# Supplementary material for: A Star Pattern Recognition Algorithm Based on the Radial Companion-Circumferential Feature
Source: Hindawi journal article supplement (doi:10.1155/2022/1857481), 2022-09-13
Supplement: f1 [file 1857481.f1.zip]

Archive with 3 entries (3 files):
- 1857481.f1/Annex 2-simple star catalog.pdf
- 1857481.f1/Annex 3- 8 star maps data.pdf
- 1857481.f1/Annex1-Background of the project.doc
