# Supplementary material for: A Star Pattern Recognition Algorithm Based on the Radial Companion-Circumferential Feature
Source: Hindawi journal article supplement (doi:10.1155/2022/1857481), 2022-09-13
Supplement: f1 [file 1857481.f1.zip › 1857481.f1/Annex 2-simple star catalog.pdf]

|    |          |          |      |
|----|----------|----------|------|
| 1  | 0.269093 | -48.8099 | 5.71 |
| 2  | 0.33383  | -50.3374 | 5.54 |
| 3  | 0.398765 | -77.0657 | 4.79 |
| 4  | 0.404231 | 61.2228  | 5.58 |
| 5  | 0.456035 | -3.0275  | 5.13 |
| 6  | 0.490079 | -6.01407 | 4.4  |
| 7  | 0.542313 | 27.08226 | 5.8  |
| 8  | 0.583003 | -29.7204 | 5.04 |
| 9  | 0.62376  | 8.485463 | 5.7  |
| 10 | 0.650363 | 66.09897 | 5.84 |
| 11 | 0.934958 | -17.336  | 4.55 |
| 12 | 1.056927 | 62.28766 | 5.87 |
| 13 | 1.082475 | -16.529  | 5.78 |
| 14 | 1.125494 | -10.5095 | 4.94 |
| 15 | 1.172118 | -71.4369 | 5.59 |
| 16 | 1.174922 | 67.16645 | 5.69 |
| 17 | 1.275625 | 61.31397 | 5.8  |
| 18 | 1.33392  | -5.70762 | 4.62 |
| 19 | 1.424839 | 13.39627 | 5.55 |
| 20 | 1.579898 | -49.0752 | 5.71 |
| 21 | 1.610583 | 64.19617 | 5.57 |
| 22 | 1.945416 | -22.5086 | 5.94 |
| 23 | 2.014531 | -33.5293 | 5.66 |
| 24 | 2.073052 | -8.82411 | 5.99 |
| 25 | 2.096911 | 29.09043 | 2.06 |
| 26 | 2.260103 | 18.21196 | 5.56 |
| 27 | 2.294521 | 59.14978 | 2.28 |
| 28 | 2.337786 | -27.9879 | 5.44 |
| 29 | 2.352675 | -45.7474 | 3.88 |
| 30 | 2.509065 | -82.224  | 5.28 |
| 31 | 2.509176 | 11.14581 | 5.54 |
| 32 | 2.578624 | -5.24859 | 5.85 |
| 33 | 2.580191 | 46.07227 | 5.03 |
| 34 | 2.678478 | -12.5799 | 5.87 |
| 35 | 2.816072 | -15.468  | 4.9  |
| 36 | 2.893417 | -27.7997 | 5.41 |
| 37 | 2.933369 | -35.1331 | 5.24 |
| 38 | 3.041608 | -17.9383 | 5.27 |
| 39 | 3.30897  | 15.1836  | 2.83 |
| 40 | 3.331758 | -84.994  | 5.79 |
| 41 | 3.378502 | 41.03537 | 5.72 |
| 42 | 3.42602  | -26.0223 | 5.95 |
| 43 | 3.615118 | -7.78053 | 5.15 |
| 44 | 3.650685 | 20.2067  | 4.8  |
| 45 | 3.660067 | -18.9329 | 4.46 |
| 46 | 3.727145 | -9.56957 | 5.77 |
| 47 | 4.036943 | -31.4464 | 5.65 |
| 48 | 4.237681 | 61.53319 | 5.74 |
| 49 | 4.27291  | 38.68164 | 4.62 |
| 50 | 4.287682 | 47.94741 | 5.86 |
| 51 | 4.581904 | 36.78522 | 4.51 |
| 52 | 4.659406 | 31.51723 | 5.88 |
| 53 | 4.856978 | -8.82392 | 3.55 |
| 54 | 5.01775  | -64.8748 | 4.23 |
| 55 | 5.101677 | 30.93561 | 5.88 |
| 56 | 5.149423 | 8.190271 | 5.38 |
| 57 | 5.16265  | -69.6249 | 5.5  |
| 58 | 5.189659 | 32.91119 | 5.81 |
| 59 | 5.280288 | 37.9686  | 5.16 |

|     |          |          |      |
|-----|----------|----------|------|
| 60  | 5.36992  | -77.4269 | 5.97 |
| 61  | 5.379993 | -28.9815 | 5.17 |
| 62  | 5.442807 | -20.058  | 5.72 |
| 63  | 6.065221 | 52.01991 | 5.59 |
| 64  | 6.19794  | 61.83106 | 5.39 |
| 65  | 6.276711 | 53.04679 | 5.73 |
| 66  | 6.350868 | 1.939693 | 5.77 |
| 67  | 6.4378   | -77.2542 | 2.82 |
| 68  | 6.550841 | -43.6798 | 3.95 |
| 69  | 6.571046 | -42.306  | 2.4  |
| 70  | 6.811285 | -25.5472 | 5.98 |
| 71  | 6.982077 | -33.0072 | 4.87 |
| 72  | 7.012146 | 17.89312 | 5.06 |
| 73  | 7.056891 | 44.39445 | 5.19 |
| 74  | 7.110504 | -39.915  | 5.42 |
| 75  | 7.509825 | -3.95733 | 5.73 |
| 76  | 7.530688 | 29.75156 | 5.22 |
| 77  | 7.583053 | 59.97755 | 5.95 |
| 78  | 7.594392 | -23.7877 | 5.17 |
| 79  | 7.608824 | -48.2149 | 5.67 |
| 80  | 7.854086 | -48.8035 | 4.76 |
| 81  | 7.856833 | 33.58164 | 5.87 |
| 82  | 7.92149  | 52.83953 | 5.6  |
| 83  | 7.943162 | 54.52229 | 4.74 |
| 84  | 8.099096 | 6.955464 | 5.67 |
| 85  | 8.147858 | 20.29432 | 5.37 |
| 86  | 8.182938 | -63.0315 | 5.07 |
| 87  | 8.249965 | 62.93178 | 4.19 |
| 88  | 8.293311 | 54.89499 | 5.92 |
| 89  | 8.42101  | -29.5583 | 5.55 |
| 90  | 8.61597  | -52.3731 | 5.57 |
| 91  | 8.812015 | -3.59285 | 5.2  |
| 92  | 8.886806 | -0.50561 | 5.94 |
| 93  | 8.921567 | -48.0009 | 5.52 |
| 94  | 9.034627 | 54.16845 | 5.09 |
| 95  | 9.11394  | 60.32621 | 5.8  |
| 96  | 9.193504 | 44.48859 | 5.15 |
| 97  | 9.197135 | 15.23173 | 5.88 |
| 98  | 9.220207 | 33.71934 | 4.35 |
| 99  | 9.242853 | 53.89691 | 3.68 |
| 100 | 9.336253 | -24.7673 | 5.6  |
| 101 | 9.338414 | 35.3995  | 5.43 |
| 102 | 9.638941 | 29.31175 | 4.35 |
| 103 | 9.791225 | 49.35459 | 5.44 |
| 104 | 9.831983 | 30.86102 | 3.27 |
| 105 | 9.840859 | 21.25047 | 5.88 |
| 106 | 9.966458 | -44.7963 | 6    |
| 107 | 9.981549 | 21.4385  | 5.43 |
| 108 | 10.10696 | -59.4546 | 5.9  |
| 109 | 10.12684 | 56.53733 | 2.25 |
| 110 | 10.17655 | -4.35184 | 5.9  |
| 111 | 10.27994 | 39.45866 | 5.31 |
| 112 | 10.33147 | -46.085  | 4.6  |
| 113 | 10.44332 | -56.5013 | 5.71 |
| 114 | 10.51426 | 66.14759 | 5.82 |
| 115 | 10.51623 | 50.51253 | 4.81 |
| 116 | 10.61822 | -65.468  | 5.39 |
| 117 | 10.67479 | -60.2628 | 5.99 |
| 118 | 10.83849 | -57.4631 | 4.37 |

|     |          |          |      |
|-----|----------|----------|------|
| 119 | 10.86696 | 47.02455 | 4.96 |
| 120 | 10.89738 | -17.9866 | 2.05 |
| 121 | 10.9587  | -12.0118 | 6    |
| 122 | 11.04751 | -10.6096 | 4.77 |
| 123 | 11.05041 | -38.4217 | 5.9  |
| 124 | 11.10913 | 47.86398 | 5.66 |
| 125 | 11.18132 | 48.28436 | 4.48 |
| 126 | 11.18498 | -22.0061 | 5.23 |
| 127 | 11.23772 | -42.6766 | 5.94 |
| 128 | 11.32156 | 55.2214  | 5.42 |
| 129 | 11.41282 | 74.98807 | 5.65 |
| 130 | 11.43997 | -47.552  | 5.8  |
| 131 | 11.54897 | -22.5221 | 5.5  |
| 132 | 11.63733 | 15.4755  | 5.41 |
| 133 | 11.75608 | 11.97385 | 5.51 |
| 134 | 11.83469 | 24.26718 | 4.09 |
| 135 | 11.84847 | 6.740956 | 5.98 |
| 136 | 11.93008 | -18.0613 | 5.7  |
| 137 | 11.94189 | 74.84757 | 5.43 |
| 138 | 12.00444 | -21.7225 | 5.57 |
| 139 | 12.03807 | 72.67448 | 5.86 |
| 140 | 12.07254 | 7.299928 | 5.92 |
| 141 | 12.09574 | 5.280615 | 5.75 |
| 142 | 12.14757 | -74.9234 | 5.08 |
| 143 | 12.1706  | 7.585079 | 4.42 |
| 144 | 12.20842 | 50.96817 | 4.91 |
| 145 | 12.24462 | 16.94064 | 5.07 |
| 146 | 12.27621 | 57.81519 | 3.45 |
| 147 | 12.30812 | -24.1367 | 5.9  |
| 148 | 12.35673 | -13.5613 | 5.6  |
| 149 | 12.45353 | 41.07891 | 4.54 |
| 150 | 12.53163 | -10.6443 | 5.17 |
| 151 | 12.67161 | -50.9868 | 5.23 |
| 152 | 12.68172 | 64.24755 | 5.37 |
| 153 | 13.16927 | -24.0058 | 5.47 |
| 154 | 13.25206 | -1.14426 | 4.76 |
| 155 | 13.26749 | 61.12397 | 4.8  |
| 156 | 13.40781 | -62.8714 | 5.75 |
| 157 | 13.64678 | 19.18842 | 5.8  |
| 158 | 13.72122 | 83.70744 | 5.59 |
| 159 | 13.74211 | 23.62834 | 5.5  |
| 160 | 13.75065 | 58.9727  | 4.82 |
| 161 | 13.7513  | -69.5271 | 5.46 |
| 162 | 13.92667 | -7.34715 | 5.87 |
| 163 | 14.00621 | -11.2665 | 5.34 |
| 164 | 14.16627 | 59.18106 | 4.63 |
| 165 | 14.17722 | 60.71674 | 2.18 |
| 166 | 14.18838 | 38.49934 | 3.87 |
| 167 | 14.19572 | 60.36284 | 5.55 |
| 168 | 14.30167 | 23.41765 | 4.4  |
| 169 | 14.45897 | 28.99222 | 5.43 |
| 170 | 14.55925 | 33.95088 | 5.99 |
| 171 | 14.62943 | 66.35179 | 5.97 |
| 172 | 14.6515  | -29.3574 | 4.31 |
| 173 | 14.68278 | -11.38   | 5.62 |
| 174 | 15.32615 | -38.9165 | 5.59 |
| 175 | 15.61014 | -31.552  | 5.51 |
| 176 | 15.70457 | 31.80426 | 5.5  |
| 177 | 15.70496 | -46.3973 | 5.39 |

|     |          |          |      |
|-----|----------|----------|------|
| 178 | 15.72609 | 41.34516 | 5.94 |
| 179 | 15.73587 | 7.890136 | 4.28 |
| 180 | 15.76057 | -4.8366  | 5.4  |
| 181 | 15.90419 | 61.07482 | 5.96 |
| 182 | 16.00996 | 52.50216 | 5.99 |
| 183 | 16.08105 | 61.58018 | 5.84 |
| 184 | 16.27232 | 14.94613 | 5.64 |
| 185 | 16.52103 | -46.7184 | 3.32 |
| 186 | 16.52145 | -9.83935 | 5.58 |
| 187 | 16.82777 | -61.7753 | 5.35 |
| 188 | 16.94254 | -9.78555 | 5.71 |
| 189 | 16.94942 | -41.4869 | 5.21 |
| 190 | 16.98818 | 20.73911 | 5.57 |
| 191 | 17.00354 | 43.94209 | 5.04 |
| 192 | 17.06831 | 54.92034 | 5.17 |
| 193 | 17.09249 | 5.649819 | 5.51 |
| 194 | 17.09617 | -55.2458 | 3.98 |
| 195 | 17.13944 | 58.26345 | 5.78 |
| 196 | 17.14747 | -10.1823 | 3.46 |
| 197 | 17.18699 | 86.25709 | 4.24 |
| 198 | 17.37552 | 47.24179 | 4.26 |
| 199 | 17.43302 | 35.62056 | 2.08 |
| 200 | 17.45501 | 19.65841 | 5.56 |
| 201 | 17.57809 | 42.08148 | 5.67 |
| 202 | 17.58105 | 25.45776 | 5.8  |
| 203 | 17.6398  | 2.44567  | 5.95 |
| 204 | 17.66384 | 68.77862 | 5.32 |
| 205 | 17.77568 | 55.1499  | 4.34 |
| 206 | 17.7782  | 31.42474 | 5.16 |
| 207 | 17.79282 | 37.72412 | 5.79 |
| 208 | 17.85655 | 64.20268 | 5.56 |
| 209 | 17.86342 | 21.03465 | 4.66 |
| 210 | 17.91515 | 30.08964 | 4.52 |
| 211 | 17.92251 | 65.01885 | 5.57 |
| 212 | 17.93129 | -2.25108 | 5.93 |
| 213 | 18.07009 | 79.67396 | 5.59 |
| 214 | 18.1893  | -37.8565 | 5.94 |
| 215 | 18.43286 | 7.575354 | 5.2  |
| 216 | 18.43728 | 24.58371 | 4.67 |
| 217 | 18.53179 | 16.13348 | 5.97 |
| 218 | 18.60017 | -7.92283 | 5.15 |
| 219 | 18.70488 | -0.97379 | 5.7  |
| 220 | 18.79634 | -45.5317 | 4.97 |
| 221 | 18.94234 | -68.8759 | 4.25 |
| 222 | 19.04961 | 71.74385 | 5.91 |
| 223 | 19.1512  | -2.50037 | 5.43 |
| 224 | 19.44982 | 3.614466 | 5.15 |
| 225 | 19.86665 | 27.26406 | 4.75 |
| 226 | 20.02048 | 58.23161 | 5    |
| 227 | 20.28072 | 28.73821 | 5.22 |
| 228 | 20.58508 | 45.52878 | 4.87 |
| 229 | 20.85395 | 20.46897 | 5.98 |
| 230 | 20.87899 | -30.9456 | 5.83 |
| 231 | 20.91923 | 37.71494 | 5.59 |
| 232 | 21.00585 | -8.18326 | 3.61 |
| 233 | 21.08549 | -6.91459 | 5.92 |
| 234 | 21.16994 | -41.4925 | 5.42 |
| 235 | 21.27211 | -64.3695 | 5.91 |
| 236 | 21.40515 | -14.5988 | 4.91 |

|     |          |          |      |
|-----|----------|----------|------|
| 237 | 21.45397 | 60.23528 | 2.68 |
| 238 | 21.48342 | 68.13001 | 4.72 |
| 239 | 21.56359 | 19.17235 | 5.35 |
| 240 | 21.57786 | 43.45774 | 5.98 |
| 241 | 21.67366 | 19.24042 | 5.5  |
| 242 | 21.71485 | -13.0565 | 5.51 |
| 243 | 21.91409 | 45.40669 | 4.83 |
| 244 | 22.09136 | -43.3182 | 3.44 |
| 245 | 22.40056 | -21.6293 | 5.11 |
| 246 | 22.52543 | 47.00727 | 5.26 |
| 247 | 22.54631 | 6.143821 | 4.84 |
| 248 | 22.59544 | -26.2079 | 5.93 |
| 249 | 22.80732 | 70.2646  | 5.83 |
| 250 | 22.81294 | -49.0727 | 3.94 |
| 251 | 22.87087 | 15.34582 | 3.63 |
| 252 | 22.9302  | -30.2831 | 5.79 |
| 253 | 23.23355 | -36.8652 | 5.5  |
| 254 | 23.35713 | 58.32733 | 5.72 |
| 255 | 23.42849 | -7.02534 | 5.76 |
| 256 | 23.48282 | 59.23204 | 4.69 |
| 257 | 23.56919 | 37.23715 | 5.9  |
| 258 | 23.65741 | -15.6764 | 5.62 |
| 259 | 23.70444 | 18.46051 | 5.9  |
| 260 | 23.97815 | 17.43384 | 5.95 |
| 261 | 23.9957  | -15.4002 | 5.41 |
| 262 | 24.03546 | -29.9073 | 5.7  |
| 263 | 24.19935 | 41.40546 | 4.1  |
| 264 | 24.27465 | 12.14153 | 5.55 |
| 265 | 24.36667 | -84.7696 | 5.67 |
| 266 | 24.42853 | -57.2368 | 0.54 |
| 267 | 24.48151 | -82.975  | 5.88 |
| 268 | 24.49815 | 48.62821 | 3.59 |
| 269 | 24.53153 | 57.97763 | 5.54 |
| 270 | 24.61452 | -36.5283 | 5.94 |
| 271 | 24.62882 | 73.04004 | 5.28 |
| 272 | 24.71579 | -21.2754 | 5.58 |
| 273 | 24.83751 | 44.38616 | 5.01 |
| 274 | 24.92008 | 16.40586 | 5.99 |
| 275 | 25.14507 | 40.57705 | 4.97 |
| 276 | 25.16521 | 43.29769 | 5.64 |
| 277 | 25.35789 | 5.487613 | 4.44 |
| 278 | 25.41349 | 30.04712 | 5.96 |
| 279 | 25.43681 | -11.3247 | 5.8  |
| 280 | 25.44643 | 42.61337 | 4.96 |
| 281 | 25.44986 | -60.7893 | 5.7  |
| 282 | 25.51247 | -36.8323 | 5.71 |
| 283 | 25.51454 | 35.24571 | 5.64 |
| 284 | 25.53581 | -32.327  | 5.26 |
| 285 | 25.58553 | 68.04302 | 5.57 |
| 286 | 25.62215 | -53.7408 | 5.52 |
| 287 | 25.62401 | 20.2685  | 5.24 |
| 288 | 25.68129 | -3.6902  | 4.99 |
| 289 | 25.73277 | 70.62253 | 5.18 |
| 290 | 25.83231 | 60.55133 | 5.78 |
| 291 | 25.91516 | 50.68873 | 4.04 |
| 292 | 26.01701 | -15.9375 | 3.49 |
| 293 | 26.34846 | 9.157736 | 4.27 |
| 294 | 26.41149 | -25.0526 | 5.33 |
| 295 | 26.49692 | -5.7333  | 5.36 |

|     |          |          |      |
|-----|----------|----------|------|
| 296 | 26.52486 | -50.8163 | 5.49 |
| 297 | 26.5261  | -53.522  | 5.04 |
| 298 | 26.93681 | 63.8525  | 5.62 |
| 299 | 27.04557 | 16.95555 | 5.86 |
| 300 | 27.10841 | 3.685447 | 5.91 |
| 301 | 27.16219 | 37.95287 | 5.94 |
| 302 | 27.17318 | 32.69021 | 5.79 |
| 303 | 27.39626 | -10.6864 | 4.66 |
| 304 | 27.53571 | 22.27534 | 5.83 |
| 305 | 27.71655 | 11.04338 | 5.93 |
| 306 | 27.72681 | -50.2061 | 5.94 |
| 307 | 27.73803 | 51.93342 | 5.96 |
| 308 | 27.86514 | -10.335  | 3.73 |
| 309 | 27.99717 | 55.14738 | 5.53 |
| 310 | 28.03905 | 50.79279 | 5.7  |
| 311 | 28.21714 | -16.9292 | 5.79 |
| 312 | 28.27045 | 29.57883 | 3.42 |
| 313 | 28.32227 | 40.72979 | 5.4  |
| 314 | 28.38896 | 3.187537 | 4.62 |
| 315 | 28.41142 | -46.3027 | 4.43 |
| 316 | 28.59181 | -42.497  | 5.12 |
| 317 | 28.59886 | 63.6701  | 3.35 |
| 318 | 28.66004 | 20.80804 | 2.66 |
| 319 | 28.73388 | -67.6473 | 4.69 |
| 320 | 28.96267 | 23.57732 | 5.75 |
| 321 | 28.977   | 37.27779 | 5.9  |
| 322 | 28.98947 | -51.6089 | 3.72 |
| 323 | 29.00011 | 68.68524 | 4.98 |
| 324 | 29.03902 | 37.25183 | 5.69 |
| 325 | 29.16749 | -22.5268 | 4.9  |
| 326 | 29.292   | -47.3853 | 4.84 |
| 327 | 29.33773 | 17.81753 | 5.1  |
| 328 | 29.43227 | 27.80438 | 5.86 |
| 329 | 29.48216 | 23.59606 | 4.77 |
| 330 | 29.63961 | 49.20435 | 5.71 |
| 331 | 29.69247 | -61.5699 | 2.86 |
| 332 | 29.89868 | 21.05857 | 5.89 |
| 333 | 29.90849 | 64.6216  | 5.29 |
| 334 | 29.91173 | -42.0305 | 5.57 |
| 335 | 29.9425  | -20.8245 | 5.44 |
| 336 | 30.00128 | -21.0778 | 4    |
| 337 | 30.03817 | 3.097015 | 5.88 |
| 338 | 30.11176 | -8.52387 | 5.51 |
| 339 | 30.31135 | -30.0018 | 5.36 |
| 340 | 30.42657 | -44.7135 | 5.14 |
| 341 | 30.48939 | 70.90702 | 4.52 |
| 342 | 30.57545 | 54.48754 | 5    |
| 343 | 30.64616 | 13.47672 | 6    |
| 344 | 30.71865 | 64.90147 | 6    |
| 345 | 30.74148 | 33.28414 | 5.52 |
| 346 | 30.74404 | -15.3059 | 5.86 |
| 347 | 30.75078 | 64.39002 | 5.62 |
| 348 | 30.79854 | 0.128507 | 5.43 |
| 349 | 30.85877 | 72.42129 | 3.95 |
| 350 | 30.91393 | 25.93547 | 5.69 |
| 351 | 30.9187  | -4.10352 | 5.62 |
| 352 | 30.95071 | -0.34025 | 5.95 |
| 353 | 31.12266 | -29.2968 | 4.7  |
| 354 | 31.28092 | 77.28134 | 5.27 |

|     |          |          |      |
|-----|----------|----------|------|
| 355 | 31.38145 | 76.11506 | 5.22 |
| 356 | 31.64136 | 22.64832 | 5.03 |
| 357 | 31.79336 | 23.46242 | 2.02 |
| 358 | 32.12192 | 37.85908 | 4.79 |
| 359 | 32.16908 | 58.4236  | 5.72 |
| 360 | 32.28872 | -43.5166 | 5.84 |
| 361 | 32.35557 | 25.93989 | 4.98 |
| 362 | 32.38595 | 34.9873  | 3.02 |
| 363 | 32.65665 | 19.50034 | 5.71 |
| 364 | 32.83783 | 8.569805 | 5.64 |
| 365 | 32.84261 | -10.0522 | 6    |
| 366 | 32.89931 | -1.82543 | 5.94 |
| 367 | 33.09283 | 30.30307 | 5.15 |
| 368 | 33.15641 | 24.16778 | 5.97 |
| 369 | 33.19809 | -2.39364 | 5.65 |
| 370 | 33.20036 | 21.21099 | 5.23 |
| 371 | 33.22696 | -30.7238 | 5.27 |
| 372 | 33.24998 | 8.846717 | 4.37 |
| 373 | 33.25411 | -21.0001 | 5.87 |
| 374 | 33.26377 | 15.27986 | 5.71 |
| 375 | 33.30552 | 44.23165 | 4.83 |
| 376 | 33.40143 | 51.06582 | 5.31 |
| 377 | 33.56059 | -67.8414 | 5.57 |
| 378 | 33.63311 | -41.1668 | 5.91 |
| 379 | 33.86927 | -67.7464 | 5.67 |
| 380 | 33.92822 | 25.04302 | 5.58 |
| 381 | 33.94188 | 25.78294 | 5.79 |
| 382 | 33.98452 | 33.3589  | 5.25 |
| 383 | 34.12744 | -51.5122 | 3.55 |
| 384 | 34.24602 | -6.42212 | 5.5  |
| 385 | 34.26346 | 34.22423 | 4.87 |
| 386 | 34.32861 | 33.84719 | 4.01 |
| 387 | 34.49953 | 57.89982 | 5.75 |
| 388 | 34.506   | 1.757802 | 5.6  |
| 389 | 34.5191  | 57.51632 | 5.99 |
| 390 | 34.5314  | 19.90116 | 5.58 |
| 391 | 34.73747 | 28.64267 | 5.3  |
| 392 | 34.81998 | 47.37997 | 5.32 |
| 393 | 34.83664 | -2.97764 | 4.95 |
| 394 | 34.97613 | -55.9448 | 5.81 |
| 395 | 35.24253 | 50.15147 | 5.57 |
| 396 | 35.43726 | -68.6594 | 4.08 |
| 397 | 35.48595 | 0.395676 | 5.3  |
| 398 | 35.50638 | -10.7775 | 5.43 |
| 399 | 35.52076 | -17.6622 | 5.88 |
| 400 | 35.55165 | -0.88485 | 5.43 |
| 401 | 35.58931 | 55.84565 | 5.2  |
| 402 | 35.63561 | -23.8163 | 5.2  |
| 403 | 35.7096  | 41.3963  | 5.8  |
| 404 | 35.71794 | -73.6458 | 5.99 |
| 405 | 35.72781 | -51.0921 | 5.9  |
| 406 | 36.10382 | 50.00655 | 5.19 |
| 407 | 36.2044  | 10.61057 | 5.48 |
| 408 | 36.22463 | -60.3119 | 5.37 |
| 409 | 36.40593 | 50.27863 | 4.72 |
| 410 | 36.48752 | -12.2905 | 4.88 |
| 411 | 36.50146 | -15.3412 | 5.86 |
| 412 | 36.64674 | -20.0426 | 5.89 |
| 413 | 36.74634 | -47.7038 | 4.25 |

|     |          |          |      |
|-----|----------|----------|------|
| 414 | 36.86572 | 31.80128 | 5.56 |
| 415 | 37.0071  | -33.811  | 5.13 |
| 416 | 37.03976 | 8.460054 | 4.28 |
| 417 | 37.04159 | 29.66933 | 5.29 |
| 418 | 37.20206 | 29.93176 | 5.9  |
| 419 | 37.26644 | 67.40247 | 4.63 |
| 420 | 37.63481 | 25.23504 | 5.89 |
| 421 | 37.8754  | 2.267182 | 5.26 |
| 422 | 37.91893 | -79.1094 | 5.27 |
| 423 | 37.95452 | 89.26411 | 2    |
| 424 | 38.02178 | -15.2447 | 4.74 |
| 425 | 38.02571 | 36.14727 | 5.15 |
| 426 | 38.03925 | -1.0349  | 5.36 |
| 427 | 38.21925 | 34.54241 | 5.84 |
| 428 | 38.22559 | 15.03455 | 6    |
| 429 | 38.27928 | -34.65   | 5.9  |
| 430 | 38.46127 | -28.2323 | 4.97 |
| 431 | 38.67761 | -7.85945 | 5.73 |
| 432 | 38.91142 | 37.31226 | 5.71 |
| 433 | 38.94505 | 34.68756 | 5.39 |
| 434 | 38.96863 | 5.593246 | 4.88 |
| 435 | 39.0002  | -7.8316  | 5.53 |
| 436 | 39.02039 | 6.88687  | 5.79 |
| 437 | 39.03861 | -30.045  | 5.73 |
| 438 | 39.14613 | 7.730026 | 5.81 |
| 439 | 39.15798 | 12.44764 | 5.65 |
| 440 | 39.23828 | 38.73358 | 5.91 |
| 441 | 39.2442  | -34.578  | 5.78 |
| 442 | 39.35155 | -52.5431 | 5.3  |
| 443 | 39.40028 | 65.74534 | 5.79 |
| 444 | 39.42417 | -3.39617 | 5.65 |
| 445 | 39.50846 | 72.81825 | 5.18 |
| 446 | 39.57776 | -30.1941 | 5.84 |
| 447 | 39.70414 | 21.96141 | 5.45 |
| 448 | 39.87065 | 0.328511 | 4.07 |
| 449 | 39.89098 | -11.8722 | 4.83 |
| 450 | 39.89734 | -68.2669 | 4.11 |
| 451 | 39.94997 | -42.8917 | 4.74 |
| 452 | 40.05176 | -9.45288 | 5.8  |
| 453 | 40.16505 | -54.5499 | 5.22 |
| 454 | 40.16681 | -39.8554 | 4.12 |
| 455 | 40.17115 | 27.06094 | 5.3  |
| 456 | 40.30833 | -0.69565 | 5.76 |
| 457 | 40.3922  | -14.5493 | 5.98 |
| 458 | 40.52753 | -38.3837 | 5.99 |
| 459 | 40.56215 | 40.19394 | 4.9  |
| 460 | 40.59142 | 20.01147 | 5.74 |
| 461 | 40.63944 | -50.8003 | 5.4  |
| 462 | 40.74801 | 53.52611 | 5.84 |
| 463 | 40.76183 | 55.10602 | 5.76 |
| 464 | 40.82516 | 3.235819 | 3.47 |
| 465 | 40.86297 | 27.70715 | 4.65 |
| 466 | 41.0215  | 44.29704 | 5.44 |
| 467 | 41.03062 | -13.8587 | 4.25 |
| 468 | 41.04994 | 49.22845 | 4.11 |
| 469 | 41.13739 | 15.31186 | 5.78 |
| 470 | 41.20707 | 67.82463 | 5.95 |
| 471 | 41.23559 | 10.11415 | 4.27 |
| 472 | 41.23992 | 12.44576 | 5.19 |

|     |          |          |      |
|-----|----------|----------|------|
| 473 | 41.27577 | -18.5726 | 4.47 |
| 474 | 41.36449 | -63.7046 | 5.75 |
| 475 | 41.38598 | -67.6166 | 4.84 |
| 476 | 41.94878 | 81.44848 | 5.78 |
| 477 | 41.97725 | 29.24712 | 4.52 |
| 478 | 42.13371 | 18.28379 | 5.83 |
| 479 | 42.19127 | 25.18806 | 5.9  |
| 480 | 42.2562  | -62.8065 | 5.26 |
| 481 | 42.27258 | -32.4059 | 4.46 |
| 482 | 42.32317 | 17.46431 | 5.32 |
| 483 | 42.47576 | -27.942  | 5.39 |
| 484 | 42.49597 | 27.26051 | 3.62 |
| 485 | 42.5616  | -35.8436 | 5.93 |
| 486 | 42.61858 | -75.0669 | 4.74 |
| 487 | 42.64608 | 38.31864 | 4.22 |
| 488 | 42.66836 | -35.6758 | 5.48 |
| 489 | 42.67421 | 55.8955  | 3.76 |
| 490 | 42.75967 | -21.004  | 4.77 |
| 491 | 42.87328 | 15.08207 | 5.52 |
| 492 | 42.87849 | 35.05974 | 4.55 |
| 493 | 42.92388 | 46.84194 | 5.87 |
| 494 | 42.9948  | 68.8885  | 5.94 |
| 495 | 43.39332 | -38.437  | 5.93 |
| 496 | 43.39718 | -22.3763 | 5.93 |
| 497 | 43.42757 | 38.33749 | 5.35 |
| 498 | 43.56442 | 52.76248 | 3.94 |
| 499 | 43.95207 | 18.33164 | 5.82 |
| 500 | 43.98717 | 61.52114 | 5.59 |
| 501 | 44.05737 | 8.381563 | 5.97 |
| 502 | 44.10687 | -8.89814 | 3.9  |
| 503 | 44.10898 | 18.02312 | 5.59 |
| 504 | 44.15593 | -3.71232 | 5.17 |
| 505 | 44.32201 | 31.93422 | 5.1  |
| 506 | 44.34903 | -23.8622 | 5.44 |
| 507 | 44.52176 | 20.66873 | 5.8  |
| 508 | 44.52389 | -23.606  | 5.81 |
| 509 | 44.67532 | -2.78288 | 5.24 |
| 510 | 44.69029 | 39.66273 | 4.69 |
| 511 | 44.69915 | -64.0713 | 4.98 |
| 512 | 44.76532 | 35.18313 | 4.94 |
| 513 | 44.90076 | -25.2741 | 5.7  |
| 514 | 44.91616 | 41.03294 | 5.88 |
| 515 | 44.9215  | -2.46495 | 5.55 |
| 516 | 44.92876 | 8.907365 | 4.71 |
| 517 | 44.95747 | 47.22069 | 5.49 |
| 518 | 45.18392 | 10.87039 | 5.95 |
| 519 | 45.21756 | 52.35174 | 5.26 |
| 520 | 45.29177 | -7.66301 | 5.75 |
| 521 | 45.40682 | -28.0916 | 5.88 |
| 522 | 45.47559 | 26.46235 | 5.92 |
| 523 | 45.48383 | -9.96141 | 5.83 |
| 524 | 45.56437 | -71.9025 | 5.51 |
| 525 | 45.56988 | 4.089734 | 2.55 |
| 526 | 45.59382 | 4.352884 | 5.62 |
| 527 | 45.59792 | -23.6245 | 4.09 |
| 528 | 45.67615 | -7.68547 | 5.33 |
| 529 | 45.73276 | -46.975  | 5.8  |
| 530 | 45.90341 | -59.7378 | 5.12 |
| 531 | 46.06882 | -7.60086 | 5.26 |

|     |          |          |      |
|-----|----------|----------|------|
| 532 | 46.19913 | 53.50644 | 2.94 |
| 533 | 46.29414 | 38.84027 | 3.41 |
| 534 | 46.36126 | 25.25519 | 5.46 |
| 535 | 46.38505 | 56.70572 | 4.77 |
| 536 | 46.53268 | 79.41854 | 5.52 |
| 537 | 46.59869 | 13.18725 | 5.64 |
| 538 | 46.63955 | -6.08855 | 5.26 |
| 539 | 46.82916 | 64.05759 | 5.89 |
| 540 | 46.88393 | -78.9892 | 5.67 |
| 541 | 47.04222 | 40.95565 | 2.11 |
| 542 | 47.26675 | 49.61328 | 4.05 |
| 543 | 47.37405 | 44.85754 | 3.79 |
| 544 | 47.40309 | 29.07708 | 5.75 |
| 545 | 47.66164 | 11.87263 | 5.97 |
| 546 | 47.82242 | 39.61158 | 4.61 |
| 547 | 47.90736 | 19.72668 | 4.35 |
| 548 | 47.9278  | 81.47071 | 5.91 |
| 549 | 47.98446 | 74.39366 | 4.84 |
| 550 | 48.01887 | -28.9876 | 3.8  |
| 551 | 48.05936 | 27.25697 | 5.78 |
| 552 | 48.10986 | 6.660883 | 5.57 |
| 553 | 48.13817 | -57.3215 | 5.78 |
| 554 | 48.19349 | -1.1961  | 5.07 |
| 555 | 48.34947 | 48.17695 | 5.92 |
| 556 | 48.7254  | 21.04444 | 4.88 |
| 557 | 48.83515 | 30.55669 | 5.61 |
| 558 | 48.94988 | 57.14062 | 5.82 |
| 559 | 48.95844 | -8.81973 | 4.81 |
| 560 | 48.99025 | -77.3885 | 5.51 |
| 561 | 49.05085 | 50.93766 | 5.05 |
| 562 | 49.14662 | 32.18402 | 6    |
| 563 | 49.36082 | -47.7517 | 5.84 |
| 564 | 49.44064 | 39.28337 | 5.98 |
| 565 | 49.44235 | -62.5753 | 5.53 |
| 566 | 49.44731 | 44.02502 | 5.49 |
| 567 | 49.51081 | -28.7971 | 5.92 |
| 568 | 49.55341 | -62.5064 | 5.24 |
| 569 | 49.59212 | -22.5111 | 4.87 |
| 570 | 49.59344 | -0.93029 | 5.42 |
| 571 | 49.65726 | 50.22217 | 5.17 |
| 572 | 49.67146 | -18.5598 | 5.83 |
| 573 | 49.6826  | 34.22265 | 4.82 |
| 574 | 49.78183 | 50.09497 | 5.04 |
| 575 | 49.8404  | 3.370198 | 4.85 |
| 576 | 49.87917 | -21.7579 | 3.74 |
| 577 | 49.89545 | -24.1229 | 5.65 |
| 578 | 49.98188 | -43.0698 | 4.26 |
| 579 | 49.98249 | 27.07113 | 5.92 |
| 580 | 49.99697 | 65.65229 | 4.74 |
| 581 | 50.08233 | 77.73474 | 5.45 |
| 582 | 50.08484 | 29.04846 | 4.46 |
| 583 | 50.27835 | 3.67562  | 5.68 |
| 584 | 50.30677 | 21.14709 | 5.31 |
| 585 | 50.35004 | -23.6351 | 5.5  |
| 586 | 50.36066 | 43.32965 | 4.95 |
| 587 | 50.46889 | 49.0709  | 5.94 |
| 588 | 50.54956 | 27.60755 | 5.55 |
| 589 | 50.68851 | 20.74207 | 5.08 |
| 590 | 50.80498 | 49.21327 | 5.33 |

|     |          |          |      |
|-----|----------|----------|------|
| 591 | 51.07698 | 24.72406 | 5.5  |
| 592 | 51.08071 | 49.86118 | 1.81 |
| 593 | 51.12376 | 33.53596 | 5.8  |
| 594 | 51.16899 | 64.586   | 5.17 |
| 595 | 51.20331 | 9.02887  | 3.61 |
| 596 | 51.40105 | -69.3364 | 5.96 |
| 597 | 51.59385 | -27.3175 | 5.93 |
| 598 | 51.7923  | 9.73268  | 3.73 |
| 599 | 51.88925 | -35.6813 | 5.7  |
| 600 | 52.00395 | -11.2866 | 5.74 |
| 601 | 52.01279 | 49.06287 | 4.99 |
| 602 | 52.08625 | 33.80756 | 5.72 |
| 603 | 52.21803 | 49.84838 | 5.59 |
| 604 | 52.26722 | 59.94033 | 4.26 |
| 605 | 52.34188 | 49.50895 | 4.69 |
| 606 | 52.34449 | -62.9375 | 4.71 |
| 607 | 52.40011 | -12.6747 | 5.58 |
| 608 | 52.41307 | -6.80446 | 5.99 |
| 609 | 52.4781  | 58.87875 | 4.6  |
| 610 | 52.47978 | -42.6343 | 5.77 |
| 611 | 52.49539 | -78.3519 | 5.68 |
| 612 | 52.50077 | 55.45181 | 5.1  |
| 613 | 52.60195 | 11.33644 | 5.13 |
| 614 | 52.64368 | 47.99522 | 4.34 |
| 615 | 52.65396 | 48.1036  | 5.82 |
| 616 | 52.65398 | -47.3751 | 5.98 |
| 617 | 52.65441 | -5.07515 | 4.74 |
| 618 | 52.68925 | 6.188703 | 5.92 |
| 619 | 52.71545 | -66.4897 | 5.81 |
| 620 | 52.71824 | 12.93668 | 4.13 |
| 621 | 53.03584 | 48.02348 | 5.47 |
| 622 | 53.08385 | 84.91104 | 5.61 |
| 623 | 53.10942 | 46.05686 | 5.31 |
| 624 | 53.14501 | -50.3786 | 5.66 |
| 625 | 53.14979 | 9.373438 | 5.76 |
| 626 | 53.16674 | 35.46173 | 5.91 |
| 627 | 53.23268 | -9.45826 | 3.73 |
| 628 | 53.39598 | 39.89948 | 5.8  |
| 629 | 53.41275 | 54.97486 | 5.98 |
| 630 | 53.44698 | -21.6329 | 4.27 |
| 631 | 53.61094 | 24.46439 | 5.99 |
| 632 | 53.99028 | -11.1938 | 5.58 |
| 633 | 54.07254 | -17.4671 | 5.25 |
| 634 | 54.12241 | 48.19263 | 4.32 |
| 635 | 54.19704 | 0.587758 | 5.9  |
| 636 | 54.21826 | 0.401662 | 4.3  |
| 637 | 54.27367 | -40.2745 | 4.59 |
| 638 | 54.62189 | -7.39186 | 5.85 |
| 639 | 54.75466 | -5.62621 | 5.97 |
| 640 | 54.96301 | 3.056863 | 5.55 |
| 641 | 55.15972 | -5.21071 | 5.53 |
| 642 | 55.28274 | 37.5802  | 5.55 |
| 643 | 55.53885 | 63.21681 | 5.1  |
| 644 | 55.56209 | -31.9384 | 4.98 |
| 645 | 55.57895 | 19.70025 | 5.69 |
| 646 | 55.59436 | 33.96503 | 4.98 |
| 647 | 55.67806 | 59.96939 | 5.74 |
| 648 | 55.70856 | -37.3135 | 4.59 |
| 649 | 55.73126 | 47.78755 | 3.02 |

|     |          |          |      |
|-----|----------|----------|------|
| 650 | 55.81209 | -9.76339 | 3.53 |
| 651 | 55.89097 | -10.4857 | 5.6  |
| 652 | 56.04991 | -64.8069 | 3.84 |
| 653 | 56.07972 | 32.28825 | 3.86 |
| 654 | 56.12713 | -1.16309 | 5.24 |
| 655 | 56.13097 | 36.4601  | 5.6  |
| 656 | 56.2009  | 24.28947 | 5.46 |
| 657 | 56.21891 | 24.11334 | 3.71 |
| 658 | 56.23541 | -0.29672 | 5.56 |
| 659 | 56.29058 | 24.83926 | 5.66 |
| 660 | 56.29847 | 42.57855 | 3.78 |
| 661 | 56.30206 | 24.46728 | 4.3  |
| 662 | 56.31615 | -47.3595 | 5.72 |
| 663 | 56.41851 | 6.049991 | 5.34 |
| 664 | 56.45669 | 24.36775 | 3.88 |
| 665 | 56.47698 | 24.55451 | 5.77 |
| 666 | 56.49692 | 45.6819  | 5.66 |
| 667 | 56.50391 | 67.20161 | 5.79 |
| 668 | 56.50971 | 63.34505 | 4.81 |
| 669 | 56.53557 | -12.1016 | 4.43 |
| 670 | 56.53901 | 6.803521 | 5.92 |
| 671 | 56.58156 | 23.94836 | 4.17 |
| 672 | 56.61429 | -29.3382 | 5.92 |
| 673 | 56.71203 | -23.2497 | 4.22 |
| 674 | 56.80976 | -74.239  | 3.26 |
| 675 | 56.87115 | 24.10514 | 2.87 |
| 676 | 56.91521 | -23.8747 | 5.24 |
| 677 | 56.9835  | -30.1679 | 5.53 |
| 678 | 57.06779 | 11.14329 | 5.08 |
| 679 | 57.08674 | 23.42125 | 5.45 |
| 680 | 57.14877 | -20.903  | 5.82 |
| 681 | 57.16231 | 0.227857 | 5.91 |
| 682 | 57.28382 | 43.96309 | 5.95 |
| 683 | 57.29059 | 24.05342 | 3.63 |
| 684 | 57.29673 | 24.13671 | 5.06 |
| 685 | 57.30724 | 70.87105 | 5.4  |
| 686 | 57.36352 | -36.2003 | 4.17 |
| 687 | 57.38034 | 65.52597 | 4.42 |
| 688 | 57.38621 | 33.09138 | 5.15 |
| 689 | 57.40245 | 63.29699 | 5.83 |
| 690 | 57.51842 | 44.96786 | 5.66 |
| 691 | 57.57891 | 25.57935 | 5.23 |
| 692 | 57.58962 | 71.33227 | 4.62 |
| 693 | 57.97383 | 34.35912 | 5.79 |
| 694 | 58.00095 | 6.534908 | 5.69 |
| 695 | 58.17357 | -5.36126 | 5.49 |
| 696 | 58.29186 | 17.32708 | 5.97 |
| 697 | 58.38883 | -46.8937 | 5.92 |
| 698 | 58.41126 | 48.6505  | 5.76 |
| 699 | 58.41228 | -34.7323 | 5.1  |
| 700 | 58.42793 | -24.6122 | 4.64 |
| 701 | 58.43036 | 57.97514 | 5.79 |
| 702 | 58.53301 | 31.88364 | 2.88 |
| 703 | 58.57293 | -2.95473 | 4.72 |
| 704 | 58.59651 | -40.357  | 5.71 |
| 705 | 58.8172  | -12.0991 | 5.99 |
| 706 | 58.99239 | 47.87142 | 5.39 |
| 707 | 59.11954 | 35.0809  | 5.5  |
| 708 | 59.15218 | 50.69538 | 5.28 |

|     |          |          |      |
|-----|----------|----------|------|
| 709 | 59.21699 | 22.47797 | 5.62 |
| 710 | 59.28454 | 61.10888 | 5.03 |
| 711 | 59.35602 | 63.07226 | 4.95 |
| 712 | 59.46346 | 40.01021 | 2.91 |
| 713 | 59.50736 | -13.5085 | 2.96 |
| 714 | 59.68646 | -61.4002 | 4.56 |
| 715 | 59.71831 | -5.46995 | 5.84 |
| 716 | 59.74125 | 35.79103 | 4.05 |
| 717 | 59.87555 | -12.5744 | 5.59 |
| 718 | 59.98118 | -24.0162 | 4.63 |
| 719 | 60.1694  | -30.4907 | 5.93 |
| 720 | 60.17007 | 12.49035 | 3.42 |
| 721 | 60.20319 | 18.194   | 5.87 |
| 722 | 60.2242  | -62.1593 | 4.51 |
| 723 | 60.32563 | -61.0788 | 4.96 |
| 724 | 60.38354 | -1.54966 | 5.28 |
| 725 | 60.44223 | 9.998017 | 5.68 |
| 726 | 60.6531  | -0.26892 | 5.39 |
| 727 | 60.78908 | 5.989305 | 3.9  |
| 728 | 60.93585 | 5.435624 | 5.32 |
| 729 | 60.98585 | 8.197269 | 5.45 |
| 730 | 61.04115 | 2.826947 | 5.35 |
| 731 | 61.09031 | 24.10599 | 5.51 |
| 732 | 61.09465 | -12.7923 | 5.62 |
| 733 | 61.11317 | 59.15551 | 5.04 |
| 734 | 61.17382 | 22.08193 | 4.35 |
| 735 | 61.33441 | 22.00891 | 5.89 |
| 736 | 61.40598 | -27.6518 | 5.59 |
| 737 | 61.51326 | 68.67997 | 5.87 |
| 738 | 61.64601 | 50.35126 | 4.28 |
| 739 | 61.65172 | 27.5999  | 5.18 |
| 740 | 61.75189 | 29.0013  | 5.22 |
| 741 | 61.99757 | 17.3399  | 5.92 |
| 742 | 62.15257 | 38.03973 | 5.52 |
| 743 | 62.16538 | 47.71251 | 4.01 |
| 744 | 62.25654 | 13.39828 | 5.95 |
| 745 | 62.29153 | 19.60922 | 5.51 |
| 746 | 62.32432 | -16.3859 | 5.44 |
| 747 | 62.50683 | 86.62614 | 5.84 |
| 748 | 62.51143 | 80.69868 | 5.13 |
| 749 | 62.59384 | -6.92385 | 5.44 |
| 750 | 62.69902 | -8.81981 | 5.68 |
| 751 | 62.70775 | 26.48095 | 5.4  |
| 752 | 62.71079 | -41.9936 | 4.93 |
| 753 | 62.74592 | 33.58679 | 5.73 |
| 754 | 62.83451 | 5.523047 | 5.71 |
| 755 | 62.90085 | -20.3562 | 5.79 |
| 756 | 62.96642 | -6.83758 | 4.04 |
| 757 | 63.38793 | 7.716045 | 5.29 |
| 758 | 63.48494 | 9.263824 | 4.89 |
| 759 | 63.50048 | -42.2944 | 3.86 |
| 760 | 63.5987  | -10.2563 | 4.9  |
| 761 | 63.60618 | -62.4739 | 3.34 |
| 762 | 63.65098 | 10.01141 | 5.22 |
| 763 | 63.70227 | -62.1918 | 5.45 |
| 764 | 63.72216 | 40.48367 | 4.7  |
| 765 | 63.72443 | 48.40933 | 4.15 |
| 766 | 63.818   | -7.65287 | 4.42 |
| 767 | 63.88357 | 8.892357 | 4.29 |

|     |          |          |      |
|-----|----------|----------|------|
| 768 | 64.00661 | -51.4866 | 4.26 |
| 769 | 64.12095 | -59.3022 | 4.44 |
| 770 | 64.17953 | 53.6118  | 5.2  |
| 771 | 64.22315 | 61.84999 | 5.69 |
| 772 | 64.28375 | 57.86036 | 5.72 |
| 773 | 64.31525 | 20.57859 | 4.92 |
| 774 | 64.33009 | -6.47218 | 5.94 |
| 775 | 64.47359 | -33.7983 | 3.56 |
| 776 | 64.49697 | -80.214  | 5.69 |
| 777 | 64.56091 | 50.2955  | 4.6  |
| 778 | 64.59668 | 21.5793  | 5.64 |
| 779 | 64.80516 | 50.0487  | 5.47 |
| 780 | 64.81957 | -44.2679 | 5.33 |
| 781 | 64.85874 | 21.14231 | 5.5  |
| 782 | 64.90294 | 21.77349 | 5.36 |
| 783 | 64.94835 | 15.62764 | 3.65 |
| 784 | 64.99043 | 14.0352  | 5.58 |
| 785 | 65.04797 | 50.92093 | 5.55 |
| 786 | 65.06012 | 41.80807 | 5.95 |
| 787 | 65.0884  | 27.35075 | 4.95 |
| 788 | 65.10266 | 34.56673 | 4.93 |
| 789 | 65.15129 | 15.09545 | 5.26 |
| 790 | 65.16256 | -20.6396 | 5.38 |
| 791 | 65.16802 | 65.14044 | 5.26 |
| 792 | 65.17186 | 6.130798 | 5.76 |
| 793 | 65.17848 | -7.59249 | 5.85 |
| 794 | 65.24195 | -81.5799 | 5.77 |
| 795 | 65.36266 | -0.09817 | 5.86 |
| 796 | 65.3882  | 46.49888 | 4.82 |
| 797 | 65.44855 | 60.73563 | 5.4  |
| 798 | 65.46586 | 56.50632 | 5.91 |
| 799 | 65.47219 | -63.3864 | 5.24 |
| 800 | 65.51466 | 14.0772  | 5.72 |
| 801 | 65.59471 | 20.82142 | 5.91 |
| 802 | 65.6456  | 25.62931 | 5.38 |
| 803 | 65.73372 | 17.54251 | 3.76 |
| 804 | 65.77364 | -24.8922 | 5.81 |
| 805 | 65.85443 | 16.77726 | 5.63 |
| 806 | 65.88486 | 20.98204 | 6    |
| 807 | 65.92022 | -3.74547 | 5.17 |
| 808 | 65.96594 | 9.460968 | 5.11 |
| 809 | 66.00924 | -34.0168 | 3.96 |
| 810 | 66.024   | 17.44413 | 4.8  |
| 811 | 66.12148 | 34.13076 | 5.73 |
| 812 | 66.15609 | 33.95969 | 5.79 |
| 813 | 66.23803 | 19.04201 | 5.97 |
| 814 | 66.27224 | -61.2382 | 5.93 |
| 815 | 66.34236 | 22.29387 | 4.21 |
| 816 | 66.35423 | 22.2     | 5.27 |
| 817 | 66.37243 | 17.92791 | 4.31 |
| 818 | 66.52629 | 31.43891 | 5.28 |
| 819 | 66.57693 | 22.81358 | 4.29 |
| 820 | 66.58642 | 15.61827 | 4.49 |
| 821 | 66.65155 | 14.71378 | 4.69 |
| 822 | 66.76226 | 80.82416 | 5.4  |
| 823 | 66.8227  | 22.99634 | 5.52 |
| 824 | 66.86986 | 11.2123  | 5.87 |
| 825 | 66.94178 | -62.5212 | 5.74 |
| 826 | 67.00327 | 21.61991 | 5.71 |

|     |          |          |      |
|-----|----------|----------|------|
| 827 | 67.0553  | 83.80779 | 5.51 |
| 828 | 67.09751 | 14.74097 | 5.91 |
| 829 | 67.10988 | 16.35967 | 4.97 |
| 830 | 67.13383 | 1.380821 | 5.54 |
| 831 | 67.14373 | 15.96218 | 3.84 |
| 832 | 67.15416 | 19.18043 | 3.54 |
| 833 | 67.16266 | -19.4589 | 5.94 |
| 834 | 67.16559 | 15.87088 | 3.41 |
| 835 | 67.20902 | 13.0476  | 5.02 |
| 836 | 67.27886 | -13.0484 | 5.6  |
| 837 | 67.50152 | 83.34038 | 5.47 |
| 838 | 67.53583 | 15.63784 | 5.64 |
| 839 | 67.64014 | 16.19401 | 4.77 |
| 840 | 67.65568 | 13.7244  | 5.4  |
| 841 | 67.66204 | 15.69188 | 5.46 |
| 842 | 67.66804 | -35.6535 | 5.95 |
| 843 | 67.70875 | -44.9537 | 5.07 |
| 844 | 67.96945 | -0.04401 | 4.9  |
| 845 | 68.00767 | 53.91083 | 5.77 |
| 846 | 68.15647 | -3.20954 | 5.76 |
| 847 | 68.3773  | -29.7665 | 4.51 |
| 848 | 68.37783 | 72.5286  | 5.94 |
| 849 | 68.39146 | -62.8237 | 5.78 |
| 850 | 68.46216 | 14.84442 | 4.65 |
| 851 | 68.47803 | -6.73891 | 5.73 |
| 852 | 68.49907 | -55.045  | 3.26 |
| 853 | 68.53445 | 5.568616 | 5.68 |
| 854 | 68.54845 | -8.23135 | 5.2  |
| 855 | 68.54904 | -8.97026 | 5.23 |
| 856 | 68.6583  | 28.96115 | 5.89 |
| 857 | 68.88766 | -30.5623 | 3.81 |
| 858 | 68.91359 | 10.16078 | 4.25 |
| 859 | 68.98016 | 16.5093  | 0.99 |
| 860 | 69.07976 | -3.35246 | 3.93 |
| 861 | 69.10082 | 64.2616  | 5.91 |
| 862 | 69.17262 | 41.26481 | 4.25 |
| 863 | 69.18997 | -62.0772 | 5.44 |
| 864 | 69.30697 | 0.998314 | 5.32 |
| 865 | 69.40055 | -2.47355 | 5.22 |
| 866 | 69.53935 | 16.03329 | 5.78 |
| 867 | 69.53943 | 12.51084 | 4.27 |
| 868 | 69.5451  | -14.304  | 3.87 |
| 869 | 69.56596 | 20.68472 | 5.86 |
| 870 | 69.72315 | -12.1231 | 5.01 |
| 871 | 69.77565 | 7.870976 | 5.37 |
| 872 | 69.7884  | 15.79985 | 5.09 |
| 873 | 69.81876 | 15.91798 | 4.67 |
| 874 | 69.83213 | -14.3592 | 5.46 |
| 875 | 69.97783 | 53.07954 | 5.08 |
| 876 | 69.992   | 53.4729  | 5.37 |
| 877 | 70.01424 | 12.19761 | 5.46 |
| 878 | 70.02834 | -24.4824 | 5.57 |
| 879 | 70.11046 | -19.6715 | 4.34 |
| 880 | 70.14047 | -41.8638 | 4.45 |
| 881 | 70.33234 | 28.61499 | 5.73 |
| 882 | 70.35054 | 48.30088 | 5.65 |
| 883 | 70.4594  | 38.28018 | 5.97 |
| 884 | 70.5145  | -37.1443 | 5.04 |
| 885 | 70.56125 | 22.95693 | 4.27 |

|     |          |          |      |
|-----|----------|----------|------|
| 886 | 70.69343 | -50.4813 | 5.3  |
| 887 | 70.72636 | 43.36514 | 5.3  |
| 888 | 70.76651 | -70.931  | 5.53 |
| 889 | 70.78872 | -30.7656 | 5.66 |
| 890 | 70.83997 | 49.97379 | 5.87 |
| 891 | 71.02217 | -8.50357 | 5.78 |
| 892 | 71.03326 | -18.6666 | 5.53 |
| 893 | 71.08814 | -59.7327 | 5.28 |
| 894 | 71.10762 | 11.14614 | 5.39 |
| 895 | 71.26734 | -21.2834 | 5.7  |
| 896 | 71.37563 | -3.25466 | 4.02 |
| 897 | 71.50725 | 11.70559 | 5.35 |
| 898 | 71.57012 | 18.73469 | 5.98 |
| 899 | 71.68533 | 40.31259 | 5.99 |
| 900 | 71.90122 | -16.9345 | 5.49 |
| 901 | 72.00114 | 56.75718 | 5.28 |
| 902 | 72.13555 | -16.3295 | 5.76 |
| 903 | 72.15161 | -5.67404 | 5.77 |
| 904 | 72.20981 | 75.94122 | 5.97 |
| 905 | 72.30353 | 31.43738 | 5.57 |
| 906 | 72.32949 | 32.58819 | 5.83 |
| 907 | 72.46004 | 6.961276 | 3.19 |
| 908 | 72.47766 | 37.48827 | 4.87 |
| 909 | 72.5484  | -16.2172 | 5.03 |
| 910 | 72.65301 | 8.900176 | 4.36 |
| 911 | 72.73045 | -53.4615 | 5.62 |
| 912 | 72.78886 | 48.74068 | 5.64 |
| 913 | 72.80152 | 5.605104 | 3.68 |
| 914 | 72.84359 | 18.83986 | 5.09 |
| 915 | 72.86755 | -34.9063 | 5.83 |
| 916 | 73.02175 | 63.50542 | 5.47 |
| 917 | 73.13318 | 14.25064 | 4.74 |
| 918 | 73.15825 | 36.70319 | 4.78 |
| 919 | 73.19632 | 27.89749 | 5.97 |
| 920 | 73.19899 | 42.58663 | 5.69 |
| 921 | 73.22362 | -5.4527  | 4.38 |
| 922 | 73.34489 | 2.508225 | 5.33 |
| 923 | 73.51255 | 66.34268 | 4.31 |
| 924 | 73.5629  | 2.440672 | 3.71 |
| 925 | 73.6954  | 11.42601 | 5.19 |
| 926 | 73.69909 | 7.779097 | 5.33 |
| 927 | 73.71128 | 0.467167 | 5.99 |
| 928 | 73.72387 | 10.15083 | 4.66 |
| 929 | 73.76302 | 55.25911 | 5.53 |
| 930 | 73.77843 | -16.7407 | 5.7  |
| 931 | 73.79667 | -74.9369 | 5.46 |
| 932 | 73.8277  | -16.4178 | 5.72 |
| 933 | 73.95897 | 15.04028 | 5.79 |
| 934 | 74.02948 | 52.86976 | 5.75 |
| 935 | 74.09281 | 13.51447 | 4.08 |
| 936 | 74.10077 | -5.17136 | 5.5  |
| 937 | 74.24841 | 33.16609 | 2.68 |
| 938 | 74.32165 | 53.7521  | 4.46 |
| 939 | 74.34309 | 17.15368 | 5.49 |
| 940 | 74.4527  | 23.94856 | 5.81 |
| 941 | 74.53914 | 25.05041 | 5.79 |
| 942 | 74.63709 | 1.714016 | 4.46 |
| 943 | 74.71235 | -82.4705 | 5.84 |
| 944 | 74.75568 | -16.376  | 5.68 |

|      |          |          |      |
|------|----------|----------|------|
| 945  | 74.81421 | 37.89024 | 4.99 |
| 946  | 74.96022 | -10.2633 | 5.39 |
| 947  | 74.98224 | -12.5374 | 4.78 |
| 948  | 75.07641 | 39.3947  | 5.98 |
| 949  | 75.08634 | 81.19409 | 5.09 |
| 950  | 75.35659 | -20.0519 | 4.9  |
| 951  | 75.35977 | -7.17397 | 4.79 |
| 952  | 75.4598  | 0.722112 | 5.91 |
| 953  | 75.49223 | 43.82331 | 3.03 |
| 954  | 75.54092 | -26.275  | 5.01 |
| 955  | 75.59502 | -31.7713 | 5.92 |
| 956  | 75.61953 | 41.07584 | 3.76 |
| 957  | 75.67916 | -71.3143 | 5.3  |
| 958  | 75.68743 | -22.7951 | 5.74 |
| 959  | 75.68915 | -4.21012 | 5.86 |
| 960  | 75.70286 | -49.1514 | 5.38 |
| 961  | 75.77395 | 21.58996 | 4.62 |
| 962  | 75.85454 | 60.44225 | 4.03 |
| 963  | 75.97197 | -24.3882 | 5.59 |
| 964  | 76.10168 | -35.483  | 4.57 |
| 965  | 76.14229 | 15.40411 | 4.67 |
| 966  | 76.24173 | -49.5778 | 5.04 |
| 967  | 76.31748 | -26.1524 | 5.71 |
| 968  | 76.34882 | 1.177627 | 5.87 |
| 969  | 76.36527 | -22.371  | 3.18 |
| 970  | 76.37773 | -57.4727 | 4.71 |
| 971  | 76.53522 | 58.97237 | 5.23 |
| 972  | 76.62378 | 61.16976 | 6    |
| 973  | 76.62872 | 41.23447 | 3.17 |
| 974  | 76.6693  | 51.59772 | 4.98 |
| 975  | 76.69022 | -4.65516 | 5.1  |
| 976  | 76.85401 | -12.4913 | 5.96 |
| 977  | 76.86253 | 18.64505 | 4.92 |
| 978  | 76.89178 | -63.3997 | 5.21 |
| 979  | 76.95166 | 20.41838 | 5.29 |
| 980  | 76.96244 | -5.08645 | 2.79 |
| 981  | 76.97039 | 8.498429 | 5.35 |
| 982  | 76.98098 | 21.70482 | 5.84 |
| 983  | 77.0276  | 24.26517 | 5.51 |
| 984  | 77.08413 | -8.66532 | 5.81 |
| 985  | 77.18208 | -4.45621 | 5.12 |
| 986  | 77.2866  | -8.75408 | 4.26 |
| 987  | 77.33184 | 9.829579 | 5.43 |
| 988  | 77.42481 | 15.59723 | 4.82 |
| 989  | 77.67883 | 46.96207 | 5.68 |
| 990  | 77.8299  | -2.49078 | 5.9  |
| 991  | 77.8453  | -11.8491 | 5.69 |
| 992  | 77.92318 | 16.04567 | 5.17 |
| 993  | 78.07459 | -11.8692 | 4.47 |
| 994  | 78.09358 | 73.94667 | 5.44 |
| 995  | 78.20054 | -6.05719 | 5.9  |
| 996  | 78.23292 | -16.2055 | 3.29 |
| 997  | 78.30782 | -12.9413 | 4.43 |
| 998  | 78.32284 | 2.861266 | 4.48 |
| 999  | 78.35716 | 38.4845  | 4.83 |
| 1000 | 78.43939 | -67.1853 | 4.8  |
| 1001 | 78.62019 | -35.977  | 5.74 |
| 1002 | 78.63447 | -8.20164 | 0.28 |
| 1003 | 78.68353 | 5.156151 | 5.49 |

|      |          |          |      |
|------|----------|----------|------|
| 1004 | 78.85155 | -26.9435 | 5.06 |
| 1005 | 78.85164 | 32.6876  | 4.99 |
| 1006 | 79.01723 | 11.34135 | 5.53 |
| 1007 | 79.07562 | 34.31232 | 6    |
| 1008 | 79.17233 | 45.99799 | 0.08 |
| 1009 | 79.37121 | -34.8952 | 4.82 |
| 1010 | 79.40162 | -6.84441 | 3.6  |
| 1011 | 79.41767 | -13.5198 | 5.49 |
| 1012 | 79.54404 | 33.37161 | 4.54 |
| 1013 | 79.55515 | 73.26807 | 5.82 |
| 1014 | 79.5654  | 42.79211 | 5.64 |
| 1015 | 79.7103  | -18.1301 | 5.96 |
| 1016 | 79.75012 | 33.74839 | 5.38 |
| 1017 | 79.78531 | 40.09905 | 4.69 |
| 1018 | 79.79675 | 2.595806 | 5.34 |
| 1019 | 79.81918 | 22.09649 | 4.95 |
| 1020 | 79.84223 | -50.606  | 5.44 |
| 1021 | 79.84869 | -27.3689 | 5.98 |
| 1022 | 79.89385 | -13.1768 | 4.28 |
| 1023 | 79.99593 | -12.3156 | 5.29 |
| 1024 | 80.00384 | 33.95805 | 5.04 |
| 1025 | 80.06112 | 41.08621 | 5.47 |
| 1026 | 80.09421 | 62.65371 | 5.63 |
| 1027 | 80.11216 | -21.2398 | 4.74 |
| 1028 | 80.30286 | 29.56988 | 5.66 |
| 1029 | 80.38268 | -0.41649 | 5.66 |
| 1030 | 80.4315  | 8.428556 | 5.79 |
| 1031 | 80.44062 | -0.38247 | 4.72 |
| 1032 | 80.44273 | -24.773  | 5.06 |
| 1033 | 80.45173 | 41.80457 | 5.21 |
| 1034 | 80.63972 | 79.23115 | 5.09 |
| 1035 | 80.70833 | 3.544453 | 4.98 |
| 1036 | 80.70965 | 41.02926 | 5.54 |
| 1037 | 80.8501  | -39.6784 | 5.75 |
| 1038 | 80.86601 | 57.5444  | 5.25 |
| 1039 | 80.87565 | -13.9274 | 5.24 |
| 1040 | 80.92629 | -0.15982 | 5.69 |
| 1041 | 80.98678 | -7.80806 | 4.14 |
| 1042 | 81.1061  | 17.38353 | 5    |
| 1043 | 81.11871 | -16.9758 | 5.65 |
| 1044 | 81.11924 | -2.39715 | 3.39 |
| 1045 | 81.12045 | -0.89133 | 5.07 |
| 1046 | 81.1605  | 31.14315 | 5.94 |
| 1047 | 81.16309 | 37.38535 | 4.99 |
| 1048 | 81.18678 | 1.846445 | 4.89 |
| 1049 | 81.25727 | -10.3289 | 5.59 |
| 1050 | 81.28276 | 6.349702 | 1.66 |
| 1051 | 81.49927 | -19.6954 | 5.82 |
| 1052 | 81.57297 | 28.60745 | 1.68 |
| 1053 | 81.58028 | -58.9125 | 5.13 |
| 1054 | 81.70335 | 34.39181 | 5.93 |
| 1055 | 81.70929 | 3.095674 | 4.61 |
| 1056 | 81.77217 | -40.9435 | 5.86 |
| 1057 | 81.78447 | 30.2086  | 5.73 |
| 1058 | 81.79206 | 17.96222 | 5.41 |
| 1059 | 81.90869 | 21.93697 | 4.88 |
| 1060 | 81.91203 | 34.47589 | 5.06 |
| 1061 | 81.94004 | 15.87405 | 5.52 |
| 1062 | 82.00671 | 17.23913 | 5.77 |

|      |          |          |      |
|------|----------|----------|------|
| 1063 | 82.06135 | -20.7594 | 2.84 |
| 1064 | 82.0639  | -37.2308 | 5.57 |
| 1065 | 82.31875 | 25.15022 | 5.85 |
| 1066 | 82.34869 | -3.44639 | 5.8  |
| 1067 | 82.43326 | -1.09224 | 4.7  |
| 1068 | 82.47823 | 1.78926  | 5.76 |
| 1069 | 82.5395  | -47.0777 | 5.46 |
| 1070 | 82.54251 | 63.06722 | 5.44 |
| 1071 | 82.60902 | 15.36045 | 5.94 |
| 1072 | 82.69605 | 5.948139 | 4.23 |
| 1073 | 82.70271 | 41.46199 | 5.99 |
| 1074 | 82.78178 | -20.8637 | 5.54 |
| 1075 | 82.80315 | -35.4705 | 3.87 |
| 1076 | 82.81055 | 3.292133 | 5.46 |
| 1077 | 82.90002 | -45.9253 | 5.85 |
| 1078 | 82.9709  | -76.341  | 5.18 |
| 1079 | 82.98275 | -7.30154 | 4.61 |
| 1080 | 83.00166 | -0.29908 | 2.23 |
| 1081 | 83.05313 | 18.59423 | 4.36 |
| 1082 | 83.17231 | -1.59183 | 5.34 |
| 1083 | 83.18197 | 32.19202 | 4.74 |
| 1084 | 83.18257 | -17.8223 | 2.59 |
| 1085 | 83.21423 | -38.5134 | 5.45 |
| 1086 | 83.2482  | -64.2275 | 5.34 |
| 1087 | 83.28078 | -35.1394 | 5.76 |
| 1088 | 83.38103 | -1.15607 | 5.36 |
| 1089 | 83.38179 | 18.54023 | 5.67 |
| 1090 | 83.40632 | -62.4898 | 3.76 |
| 1091 | 83.47618 | 14.30558 | 5.6  |
| 1092 | 83.51686 | -1.47025 | 5.91 |
| 1093 | 83.56989 | 3.766895 | 5.33 |
| 1094 | 83.68659 | -73.7413 | 5.84 |
| 1095 | 83.70515 | 9.489579 | 4.41 |
| 1096 | 83.80517 | 10.24009 | 5.62 |
| 1097 | 83.81448 | -33.0797 | 5.76 |
| 1098 | 83.84652 | -4.83836 | 4.6  |
| 1099 | 83.85826 | -5.9099  | 2.78 |
| 1100 | 83.86304 | 24.03959 | 5.38 |
| 1101 | 83.91452 | -4.85607 | 5.24 |
| 1102 | 84.05339 | -1.20192 | 1.72 |
| 1103 | 84.14674 | 54.42866 | 5.73 |
| 1104 | 84.14872 | -6.06475 | 5.76 |
| 1105 | 84.22662 | 9.290673 | 4.09 |
| 1106 | 84.26557 | 17.04032 | 5.53 |
| 1107 | 84.26826 | 11.035   | 5.98 |
| 1108 | 84.28707 | 26.92422 | 5.88 |
| 1109 | 84.29122 | -80.4691 | 5.65 |
| 1110 | 84.41119 | 21.14255 | 3    |
| 1111 | 84.43591 | -28.6897 | 5.28 |
| 1112 | 84.50466 | 7.54142  | 5.87 |
| 1113 | 84.65822 | -6.57396 | 5.96 |
| 1114 | 84.65869 | 30.49239 | 5.41 |
| 1115 | 84.68135 | -40.7073 | 5.81 |
| 1116 | 84.68653 | -2.60007 | 3.8  |
| 1117 | 84.72118 | -7.21283 | 4.79 |
| 1118 | 84.79644 | 4.121467 | 4.54 |
| 1119 | 84.8263  | 29.21521 | 5.99 |
| 1120 | 84.8798  | -3.5647  | 5.98 |
| 1121 | 84.91225 | -34.0741 | 2.66 |

|      |          |          |      |
|------|----------|----------|------|
| 1122 | 84.93416 | 25.89709 | 5.17 |
| 1123 | 84.95767 | -32.6292 | 5.44 |
| 1124 | 85.21131 | -1.12879 | 4.94 |
| 1125 | 85.27332 | 0.337754 | 5.93 |
| 1126 | 85.32383 | 16.53415 | 4.84 |
| 1127 | 85.55816 | -22.3737 | 5.88 |
| 1128 | 85.56331 | -34.6678 | 5.29 |
| 1129 | 85.6102  | 65.69765 | 5.62 |
| 1130 | 85.6193  | 1.474629 | 4.9  |
| 1131 | 85.72466 | -6.79616 | 5.97 |
| 1132 | 85.84029 | -18.5575 | 5.74 |
| 1133 | 86.11579 | -22.4484 | 3.6  |
| 1134 | 86.19325 | -65.7355 | 4.34 |
| 1135 | 86.47516 | 49.82626 | 5.46 |
| 1136 | 86.49956 | -32.3064 | 5.16 |
| 1137 | 86.61405 | -46.5972 | 5.3  |
| 1138 | 86.62663 | 56.11558 | 5.93 |
| 1139 | 86.64547 | 1.168193 | 5.93 |
| 1140 | 86.68957 | 15.8225  | 6    |
| 1141 | 86.71723 | 9.522343 | 5.78 |
| 1142 | 86.73892 | -14.822  | 3.55 |
| 1143 | 86.8048  | 14.48834 | 5.73 |
| 1144 | 86.8212  | -51.0665 | 3.86 |
| 1145 | 86.85915 | 17.72914 | 5.48 |
| 1146 | 86.92878 | 13.8996  | 5.28 |
| 1147 | 86.93912 | -9.6696  | 2.06 |
| 1148 | 87.00098 | 6.454156 | 5.3  |
| 1149 | 87.25403 | 24.56754 | 4.89 |
| 1150 | 87.29349 | 39.18107 | 4.52 |
| 1151 | 87.38721 | 12.65132 | 4.88 |
| 1152 | 87.40226 | -14.4837 | 5.49 |
| 1153 | 87.45693 | -56.1667 | 4.5  |
| 1154 | 87.47292 | -22.9719 | 5.87 |
| 1155 | 87.473   | -66.9012 | 5.1  |
| 1156 | 87.51119 | 9.871218 | 5.8  |
| 1157 | 87.55444 | 4.423406 | 5.95 |
| 1158 | 87.56994 | -79.3614 | 5.46 |
| 1159 | 87.62511 | 2.0247   | 5.98 |
| 1160 | 87.72175 | -52.1089 | 5.16 |
| 1161 | 87.73997 | -35.7683 | 3.11 |
| 1162 | 87.74212 | 27.96786 | 5.58 |
| 1163 | 87.76016 | 37.30557 | 4.73 |
| 1164 | 87.8304  | -20.8791 | 3.78 |
| 1165 | 87.8416  | -7.518   | 5.35 |
| 1166 | 87.8725  | 39.14848 | 3.97 |
| 1167 | 88.0322  | -9.0419  | 5.96 |
| 1168 | 88.08417 | -57.1562 | 5.94 |
| 1169 | 88.09288 | 14.17179 | 5.6  |
| 1170 | 88.09752 | 19.86785 | 6    |
| 1171 | 88.11016 | 1.855134 | 4.75 |
| 1172 | 88.13827 | -37.6311 | 5.62 |
| 1173 | 88.27867 | -33.8014 | 4.87 |
| 1174 | 88.33186 | 27.61226 | 4.56 |
| 1175 | 88.52523 | -63.0896 | 4.65 |
| 1176 | 88.59576 | 20.27617 | 4.4  |
| 1177 | 88.68179 | -11.7742 | 5.62 |
| 1178 | 88.68349 | 0.968615 | 5.97 |
| 1179 | 88.70872 | -52.6355 | 5.29 |
| 1180 | 88.71159 | 55.70695 | 4.97 |

|      |          |          |      |
|------|----------|----------|------|
| 1181 | 88.71868 | -39.9579 | 5.56 |
| 1182 | 88.7362  | 19.74961 | 5.91 |
| 1183 | 88.74095 | 59.88837 | 5.2  |
| 1184 | 88.74579 | 31.7015  | 5.91 |
| 1185 | 88.79294 | 7.407063 | 0.57 |
| 1186 | 88.87466 | -37.1207 | 4.96 |
| 1187 | 88.87571 | -4.61655 | 5.87 |
| 1188 | 89.05946 | -22.84   | 5.97 |
| 1189 | 89.08727 | -31.3824 | 5.52 |
| 1190 | 89.10122 | -14.1677 | 3.72 |
| 1191 | 89.11682 | 9.509396 | 5.98 |
| 1192 | 89.20604 | 11.52106 | 5.89 |
| 1193 | 89.38421 | -35.2833 | 4.36 |
| 1194 | 89.49857 | 25.95391 | 4.83 |
| 1195 | 89.60184 | 1.837108 | 5.9  |
| 1196 | 89.65645 | -44.0346 | 5.81 |
| 1197 | 89.70655 | 0.552979 | 5.22 |
| 1198 | 89.72182 | 12.80826 | 5.74 |
| 1199 | 89.76797 | -9.55825 | 5.04 |
| 1200 | 89.78669 | -42.8151 | 3.94 |
| 1201 | 89.84075 | 49.92454 | 5.91 |
| 1202 | 89.88182 | 54.28466 | 3.73 |
| 1203 | 89.88218 | 44.94743 | 1.9  |
| 1204 | 89.93029 | 37.21259 | 2.65 |
| 1205 | 89.98375 | 45.93674 | 4.33 |
| 1206 | 90.01396 | -3.07425 | 4.53 |
| 1207 | 90.20488 | -51.2163 | 5.66 |
| 1208 | 90.24401 | 47.90192 | 5.72 |
| 1209 | 90.31791 | -33.9118 | 5.53 |
| 1210 | 90.42941 | 48.95945 | 5.97 |
| 1211 | 90.46009 | -10.5979 | 5    |
| 1212 | 90.59583 | 9.647277 | 4.13 |
| 1213 | 90.81502 | -26.2845 | 5.04 |
| 1214 | 90.86403 | 19.69056 | 5.15 |
| 1215 | 90.97994 | 20.13845 | 4.64 |
| 1216 | 91.03003 | 23.26333 | 4.18 |
| 1217 | 91.05626 | -6.70894 | 5.26 |
| 1218 | 91.08444 | -32.1724 | 5.65 |
| 1219 | 91.16709 | -45.0789 | 5.96 |
| 1220 | 91.24243 | 5.41997  | 5.66 |
| 1221 | 91.24317 | 4.158671 | 5.63 |
| 1222 | 91.24637 | -16.4844 | 4.97 |
| 1223 | 91.2641  | 42.98164 | 5.9  |
| 1224 | 91.36263 | -10.2426 | 5.88 |
| 1225 | 91.36325 | -35.5136 | 5.8  |
| 1226 | 91.52308 | -29.7586 | 5.79 |
| 1227 | 91.53885 | -14.9353 | 4.67 |
| 1228 | 91.53909 | -66.0396 | 5.7  |
| 1229 | 91.63374 | -23.1108 | 5.46 |
| 1230 | 91.64624 | 38.48264 | 5.35 |
| 1231 | 91.6614  | -4.19384 | 5.37 |
| 1232 | 91.73964 | -21.8123 | 5.79 |
| 1233 | 91.76412 | -62.1546 | 5.04 |
| 1234 | 91.76529 | -34.312  | 5.85 |
| 1235 | 91.8818  | -37.2529 | 5    |
| 1236 | 91.89302 | 14.76847 | 4.42 |
| 1237 | 91.92349 | -19.1659 | 5.28 |
| 1238 | 91.97025 | -42.154  | 5.5  |
| 1239 | 92.18442 | -68.8434 | 5.05 |

|      |          |          |      |
|------|----------|----------|------|
| 1240 | 92.2411  | -22.4274 | 5.49 |
| 1241 | 92.24126 | 2.499692 | 5.69 |
| 1242 | 92.38516 | 22.19026 | 5.93 |
| 1243 | 92.39385 | -14.5846 | 5.56 |
| 1244 | 92.43327 | 23.11347 | 5.76 |
| 1245 | 92.44978 | -22.7743 | 5.71 |
| 1246 | 92.49589 | 58.93569 | 5.35 |
| 1247 | 92.54335 | -40.3538 | 5.56 |
| 1248 | 92.56031 | -74.753  | 5.07 |
| 1249 | 92.57462 | -54.9686 | 4.72 |
| 1250 | 92.6445  | -27.1543 | 5.7  |
| 1251 | 92.81243 | -65.5894 | 5.02 |
| 1252 | 92.88461 | 24.42025 | 5.83 |
| 1253 | 92.96589 | -6.55029 | 5.06 |
| 1254 | 92.98498 | 14.20877 | 4.46 |
| 1255 | 93.00558 | 19.79054 | 5.76 |
| 1256 | 93.01366 | 16.13041 | 4.96 |
| 1257 | 93.08385 | 32.69338 | 5.79 |
| 1258 | 93.21276 | 65.71842 | 5.35 |
| 1259 | 93.47597 | -3.74137 | 5.83 |
| 1260 | 93.6191  | 17.90635 | 5.88 |
| 1261 | 93.65293 | -4.56846 | 5.83 |
| 1262 | 93.71199 | 19.15645 | 5.21 |
| 1263 | 93.71389 | -6.27478 | 3.98 |
| 1264 | 93.71941 | 22.5068  | 3.3  |
| 1265 | 93.78501 | -20.2722 | 5.87 |
| 1266 | 93.7853  | 13.8511  | 5.91 |
| 1267 | 93.82385 | -18.4772 | 5.99 |
| 1268 | 93.84454 | 29.49808 | 4.33 |
| 1269 | 93.8547  | 16.14318 | 5.34 |
| 1270 | 93.87364 | -4.91472 | 6    |
| 1271 | 93.89277 | -0.51219 | 5.62 |
| 1272 | 93.91892 | 59.99898 | 5.35 |
| 1273 | 93.93703 | -13.7184 | 5.01 |
| 1274 | 93.93735 | 12.55107 | 5.48 |
| 1275 | 94.03205 | -16.618  | 5.97 |
| 1276 | 94.11092 | 12.27216 | 5.04 |
| 1277 | 94.13807 | -35.1405 | 4.37 |
| 1278 | 94.14828 | -39.2644 | 6    |
| 1279 | 94.25513 | -37.7374 | 5.54 |
| 1280 | 94.27758 | 9.942391 | 5.4  |
| 1281 | 94.28987 | -37.2535 | 5.88 |
| 1282 | 94.31724 | 5.100112 | 5.71 |
| 1283 | 94.42385 | -16.8159 | 5.15 |
| 1284 | 94.47842 | 61.51529 | 5.03 |
| 1285 | 94.5572  | -19.967  | 5.51 |
| 1286 | 94.71076 | -9.39002 | 5.36 |
| 1287 | 94.71157 | 69.31979 | 4.77 |
| 1288 | 94.74573 | -20.9256 | 5.78 |
| 1289 | 94.90578 | 59.01096 | 4.45 |
| 1290 | 94.92065 | -34.3966 | 5.76 |
| 1291 | 94.92833 | -7.82291 | 5.26 |
| 1292 | 94.99833 | -2.94449 | 4.92 |
| 1293 | 95.0176  | 14.65113 | 5.68 |
| 1294 | 95.0783  | -30.0634 | 3.02 |
| 1295 | 95.151   | -34.1441 | 5.54 |
| 1296 | 95.35298 | -11.7732 | 5.59 |
| 1297 | 95.44221 | 53.45218 | 5.34 |
| 1298 | 95.52845 | -33.4364 | 3.85 |

|      |          |          |       |
|------|----------|----------|-------|
| 1299 | 95.65163 | 12.57024 | 6     |
| 1300 | 95.65948 | -69.984  | 5.55  |
| 1301 | 95.67494 | -17.9559 | 1.96  |
| 1302 | 95.73261 | -56.37   | 5.61  |
| 1303 | 95.74011 | 22.51359 | 2.9   |
| 1304 | 95.90747 | -52.1809 | 5.97  |
| 1305 | 95.94202 | 4.592865 | 4.41  |
| 1306 | 95.98298 | -25.5776 | 5.61  |
| 1307 | 95.98796 | -52.6957 | -0.63 |
| 1308 | 96.00421 | -36.7078 | 5.62  |
| 1309 | 96.043   | -11.5301 | 5.21  |
| 1310 | 96.05768 | -60.2813 | 5.78  |
| 1311 | 96.22459 | 49.28789 | 4.95  |
| 1312 | 96.31894 | -0.94588 | 5.88  |
| 1313 | 96.36929 | -69.6903 | 5.38  |
| 1314 | 96.43188 | -48.1769 | 5.79  |
| 1315 | 96.60766 | 56.2851  | 5.54  |
| 1316 | 96.66494 | -1.50734 | 5.88  |
| 1317 | 96.70364 | 58.41741 | 5.19  |
| 1318 | 96.76719 | -58.0021 | 5.82  |
| 1319 | 96.80734 | 0.299246 | 5.19  |
| 1320 | 96.81496 | -0.276   | 5.55  |
| 1321 | 96.83521 | 2.908288 | 5.55  |
| 1322 | 96.98987 | -4.76215 | 5.05  |
| 1323 | 97.04253 | -32.5801 | 4.47  |
| 1324 | 97.14204 | 30.49303 | 5.75  |
| 1325 | 97.15592 | -17.466  | 5.76  |
| 1326 | 97.16351 | -32.3713 | 5.75  |
| 1327 | 97.20672 | -7.03466 | 5.34  |
| 1328 | 97.24078 | 20.21213 | 4.14  |
| 1329 | 97.36875 | -56.8528 | 5.2   |
| 1330 | 97.45444 | -50.2391 | 5.29  |
| 1331 | 97.51239 | 46.68555 | 5.87  |
| 1332 | 97.54698 | -10.0815 | 5.91  |
| 1333 | 97.69287 | -27.7696 | 5.92  |
| 1334 | 97.69628 | 58.16263 | 5.86  |
| 1335 | 97.80456 | -35.2588 | 5.83  |
| 1336 | 97.82632 | -51.826  | 5.58  |
| 1337 | 97.84602 | -12.392  | 5.16  |
| 1338 | 97.95125 | 11.54441 | 5.22  |
| 1339 | 97.95859 | -8.15824 | 5.42  |
| 1340 | 97.96403 | -23.4184 | 4.33  |
| 1341 | 97.99296 | -58.7538 | 5.72  |
| 1342 | 98.08002 | 4.855999 | 5.85  |
| 1343 | 98.08911 | -37.6967 | 5.25  |
| 1344 | 98.09637 | -5.86882 | 5.61  |
| 1345 | 98.11327 | 32.4549  | 5.82  |
| 1346 | 98.1624  | -32.0304 | 5.72  |
| 1347 | 98.22595 | 7.332965 | 4.51  |
| 1348 | 98.40068 | 14.15516 | 5.56  |
| 1349 | 98.40801 | -1.22015 | 5.09  |
| 1350 | 98.45617 | -36.232  | 5.41  |
| 1351 | 98.64721 | -32.7163 | 5.62  |
| 1352 | 98.74408 | -52.9756 | 4.38  |
| 1353 | 98.76412 | -22.9648 | 4.53  |
| 1354 | 98.80026 | 28.02231 | 5.27  |
| 1355 | 98.81595 | 0.890216 | 5.8   |
| 1356 | 98.82332 | 9.988335 | 5.89  |
| 1357 | 98.85091 | -36.7799 | 5.79  |

|      |          |          |       |
|------|----------|----------|-------|
| 1358 | 99.09521 | -18.6599 | 5.7   |
| 1359 | 99.13682 | 38.4455  | 5.43  |
| 1360 | 99.14722 | -5.21114 | 5.52  |
| 1361 | 99.17099 | -19.2559 | 3.95  |
| 1362 | 99.19416 | -13.321  | 5.95  |
| 1363 | 99.30764 | -36.9907 | 5.73  |
| 1364 | 99.40995 | 56.85753 | 5.88  |
| 1365 | 99.42244 | 61.48123 | 5.94  |
| 1366 | 99.42792 | 16.39925 | 2.02  |
| 1367 | 99.4403  | -43.1959 | 3.18  |
| 1368 | 99.44841 | -32.3397 | 5.26  |
| 1369 | 99.47259 | -18.2375 | 4.43  |
| 1370 | 99.59584 | 28.98437 | 5.75  |
| 1371 | 99.65682 | -48.2202 | 5.03  |
| 1372 | 99.66474 | 39.39085 | 5.7   |
| 1373 | 99.70492 | 39.90256 | 5.35  |
| 1374 | 99.81966 | -14.1458 | 4.82  |
| 1375 | 99.83261 | 42.48888 | 4.79  |
| 1376 | 99.92775 | -30.4705 | 5.71  |
| 1377 | 99.94882 | 12.98277 | 5.98  |
| 1378 | 100.012  | -80.8136 | 5.61  |
| 1379 | 100.1203 | 77.99578 | 5.73  |
| 1380 | 100.1344 | 71.74879 | 5.86  |
| 1381 | 100.2444 | 9.895754 | 4.67  |
| 1382 | 100.2727 | 0.495321 | 5.79  |
| 1383 | 100.4849 | -9.16754 | 5.21  |
| 1384 | 100.6014 | 17.6453  | 5.29  |
| 1385 | 100.7707 | 44.52445 | 5.03  |
| 1386 | 100.911  | 3.932528 | 5.88  |
| 1387 | 100.983  | 25.13112 | 3.01  |
| 1388 | 100.9971 | 13.22802 | 4.49  |
| 1389 | 101.1186 | -31.0705 | 5.23  |
| 1390 | 101.1894 | 28.97093 | 5.42  |
| 1391 | 101.2872 | -16.7161 | -1.44 |
| 1392 | 101.3224 | 12.89559 | 3.34  |
| 1393 | 101.3456 | -31.7937 | 5.92  |
| 1394 | 101.38   | -30.949  | 5.7   |
| 1395 | 101.4738 | -52.4097 | 5.78  |
| 1396 | 101.4975 | -14.7961 | 5.3   |
| 1397 | 101.5589 | 59.44167 | 4.87  |
| 1398 | 101.559  | 79.56481 | 5.45  |
| 1399 | 101.6351 | 8.587153 | 5.91  |
| 1400 | 101.6626 | -10.1074 | 5.66  |
| 1401 | 101.6847 | 43.57743 | 5.25  |
| 1402 | 101.7063 | 57.16918 | 5.34  |
| 1403 | 101.7129 | -14.426  | 5.28  |
| 1404 | 101.7195 | -51.2657 | 5.38  |
| 1405 | 101.828  | -55.54   | 5.6   |
| 1406 | 101.8326 | 8.037254 | 4.77  |
| 1407 | 101.8392 | -37.9297 | 5.27  |
| 1408 | 101.9051 | -8.9985  | 5.09  |
| 1409 | 101.9149 | 48.78948 | 5.22  |
| 1410 | 101.9652 | 2.412159 | 4.47  |
| 1411 | 102.0477 | -61.9414 | 3.25  |
| 1412 | 102.0794 | -1.31892 | 5.75  |
| 1413 | 102.2406 | -15.1447 | 5.4   |
| 1414 | 102.3184 | -2.27205 | 5.76  |
| 1415 | 102.4221 | 32.60676 | 5.72  |
| 1416 | 102.4577 | 16.20289 | 5.87  |

|      |          |          |      |
|------|----------|----------|------|
| 1417 | 102.4602 | -32.5085 | 3.53 |
| 1418 | 102.4638 | -53.6224 | 4.41 |
| 1419 | 102.4776 | -46.6146 | 5.15 |
| 1420 | 102.484  | -50.6146 | 2.94 |
| 1421 | 102.5907 | -17.0846 | 5.78 |
| 1422 | 102.5973 | -31.7061 | 5.74 |
| 1423 | 102.6062 | 13.41318 | 5.68 |
| 1424 | 102.6914 | 41.78123 | 4.98 |
| 1425 | 102.7076 | -0.54088 | 5.78 |
| 1426 | 102.7181 | -34.3673 | 4.99 |
| 1427 | 102.7379 | 67.57193 | 5.14 |
| 1428 | 102.8624 | -70.9634 | 5.4  |
| 1429 | 102.8877 | 21.76115 | 5.27 |
| 1430 | 102.9268 | -36.2303 | 5.95 |
| 1431 | 102.9999 | 23.60172 | 5.67 |
| 1432 | 103.1972 | 33.96125 | 3.61 |
| 1433 | 103.2061 | 8.380373 | 5.75 |
| 1434 | 103.2711 | 59.44853 | 5.36 |
| 1435 | 103.3284 | -19.0328 | 5.65 |
| 1436 | 103.3871 | -20.2243 | 4.82 |
| 1437 | 103.426  | 68.88831 | 5.11 |
| 1438 | 103.5331 | -24.1842 | 3.84 |
| 1439 | 103.5475 | -12.0386 | 4.07 |
| 1440 | 103.6028 | -1.127   | 5.45 |
| 1441 | 103.661  | 13.17783 | 4.7  |
| 1442 | 103.7614 | -20.4049 | 5.8  |
| 1443 | 103.8278 | 25.3757  | 5.75 |
| 1444 | 103.906  | -20.1365 | 4.68 |
| 1445 | 103.9455 | -22.9414 | 5.31 |
| 1446 | 104.0277 | -14.0434 | 4.97 |
| 1447 | 104.0343 | -17.0542 | 4.39 |
| 1448 | 104.0666 | -48.7211 | 4.95 |
| 1449 | 104.1076 | 9.956578 | 5.92 |
| 1450 | 104.1336 | 46.274   | 5.85 |
| 1451 | 104.1436 | -79.4202 | 5.46 |
| 1452 | 104.2335 | 46.70535 | 5.88 |
| 1453 | 104.2522 | 33.68104 | 5.92 |
| 1454 | 104.3192 | 58.42276 | 4.36 |
| 1455 | 104.3913 | -24.6308 | 5.45 |
| 1456 | 104.4046 | 45.09409 | 4.9  |
| 1457 | 104.6046 | -34.1117 | 5.07 |
| 1458 | 104.6496 | -25.4142 | 5.59 |
| 1459 | 104.6565 | -28.9721 | 1.53 |
| 1460 | 104.7376 | 3.602356 | 5.95 |
| 1461 | 104.9606 | -67.9164 | 5.17 |
| 1462 | 105.0168 | 76.97741 | 4.54 |
| 1463 | 105.0659 | 16.079   | 5.72 |
| 1464 | 105.099  | -8.40682 | 5.95 |
| 1465 | 105.2145 | -51.4026 | 5.16 |
| 1466 | 105.2748 | -25.2156 | 5.64 |
| 1467 | 105.3392 | 70.8083  | 5.68 |
| 1468 | 105.4298 | -27.9348 | 3.47 |
| 1469 | 105.4849 | -5.72207 | 5.22 |
| 1470 | 105.5729 | 15.33601 | 5.77 |
| 1471 | 105.6033 | 24.21545 | 5.18 |
| 1472 | 105.6387 | 16.67445 | 5.86 |
| 1473 | 105.7282 | -4.23923 | 4.98 |
| 1474 | 105.7561 | -23.8333 | 3.04 |
| 1475 | 105.8129 | -59.1781 | 5.65 |

|      |          |          |      |
|------|----------|----------|------|
| 1476 | 105.8246 | 9.138355 | 5.96 |
| 1477 | 105.8769 | 29.33708 | 5.94 |
| 1478 | 105.9086 | 10.95182 | 5.12 |
| 1479 | 105.9396 | -15.6333 | 4.11 |
| 1480 | 105.965  | 12.59424 | 6    |
| 1481 | 105.9734 | -49.5839 | 4.93 |
| 1482 | 105.9888 | -43.608  | 5.54 |
| 1483 | 106.0116 | -42.3373 | 5.21 |
| 1484 | 106.0219 | -5.32398 | 5.61 |
| 1485 | 106.0272 | 20.5703  | 4.01 |
| 1486 | 106.0764 | -56.7497 | 5.16 |
| 1487 | 106.4126 | 9.1858   | 5.75 |
| 1488 | 106.5483 | 34.47397 | 5.55 |
| 1489 | 106.6699 | -11.294  | 5.43 |
| 1490 | 106.7795 | -40.8933 | 5.79 |
| 1491 | 106.8054 | -51.9683 | 5.96 |
| 1492 | 106.8433 | 34.00929 | 5.92 |
| 1493 | 106.8441 | -23.8407 | 5.76 |
| 1494 | 106.9562 | 7.471214 | 5.74 |
| 1495 | 107.0918 | 15.93067 | 5.49 |
| 1496 | 107.0979 | -26.3932 | 1.84 |
| 1497 | 107.2128 | -39.6557 | 4.83 |
| 1498 | 107.4293 | -25.231  | 5.69 |
| 1499 | 107.557  | -4.23711 | 4.92 |
| 1500 | 107.5805 | -27.4915 | 5.45 |
| 1501 | 107.6978 | -48.9321 | 5.11 |
| 1502 | 107.7849 | 30.24516 | 4.39 |
| 1503 | 107.8461 | 26.85659 | 5.76 |
| 1504 | 107.8484 | -0.30193 | 5.43 |
| 1505 | 107.9139 | 39.32055 | 4.89 |
| 1506 | 107.9234 | -20.8831 | 5.84 |
| 1507 | 107.9661 | -0.49276 | 4.15 |
| 1508 | 108.0509 | -25.9426 | 5.91 |
| 1509 | 108.0659 | -40.4988 | 5.3  |
| 1510 | 108.1076 | -36.5444 | 5.94 |
| 1511 | 108.1099 | 24.12859 | 5.85 |
| 1512 | 108.1401 | -46.7593 | 4.5  |
| 1513 | 108.28   | -11.2513 | 5.76 |
| 1514 | 108.3056 | -45.1827 | 4.89 |
| 1515 | 108.3428 | 16.15895 | 5.06 |
| 1516 | 108.3475 | 51.42875 | 5.49 |
| 1517 | 108.3501 | -22.6742 | 5.98 |
| 1518 | 108.3847 | -44.6397 | 4.51 |
| 1519 | 108.5452 | -3.90178 | 5.96 |
| 1520 | 108.5634 | -26.3525 | 4.45 |
| 1521 | 108.5647 | -9.94753 | 5.9  |
| 1522 | 108.5836 | 3.111414 | 5.35 |
| 1523 | 108.6359 | 12.11582 | 5.7  |
| 1524 | 108.6589 | -48.2719 | 4.75 |
| 1525 | 108.6749 | 24.88498 | 5.84 |
| 1526 | 108.6917 | -46.8497 | 5.72 |
| 1527 | 108.7027 | -26.7727 | 4.04 |
| 1528 | 108.7132 | -27.038  | 5.58 |
| 1529 | 108.7381 | -41.4264 | 5.95 |
| 1530 | 108.8378 | -30.6864 | 5.35 |
| 1531 | 108.8384 | -52.4992 | 5.96 |
| 1532 | 108.9143 | 7.977743 | 5.83 |
| 1533 | 108.9302 | -10.5836 | 5.94 |
| 1534 | 108.9589 | 47.23996 | 5.55 |

|      |          |          |       |
|------|----------|----------|-------|
| 1535 | 108.9788 | 59.63747 | 5.2   |
| 1536 | 108.9882 | 27.89742 | 5.75  |
| 1537 | 109.0606 | -15.5857 | 5.45  |
| 1538 | 109.0645 | -46.7745 | 5.64  |
| 1539 | 109.1327 | -38.3189 | 5.81  |
| 1540 | 109.1458 | -27.8812 | 4.67  |
| 1541 | 109.2059 | -36.5926 | 5.02  |
| 1542 | 109.2076 | -67.9572 | 3.97  |
| 1543 | 109.2857 | -37.0975 | 2.71  |
| 1544 | 109.3905 | 52.13107 | 5.94  |
| 1545 | 109.5092 | 40.88339 | 5.87  |
| 1546 | 109.5177 | -43.9868 | 5.85  |
| 1547 | 109.5232 | 16.54038 | 3.58  |
| 1548 | 109.5766 | -36.734  | 4.71  |
| 1549 | 109.6332 | 49.46476 | 5.02  |
| 1550 | 109.6396 | -39.2103 | 5.25  |
| 1551 | 109.6591 | -36.7427 | 5.1   |
| 1552 | 109.6682 | -24.5587 | 4.92  |
| 1553 | 109.677  | -24.9544 | 4.4   |
| 1554 | 109.7136 | -26.5859 | 5.29  |
| 1555 | 109.8432 | 2.740694 | 5.9   |
| 1556 | 109.8674 | -16.3952 | 5.72  |
| 1557 | 109.9485 | 7.142948 | 5.91  |
| 1558 | 110.0307 | 21.98232 | 3.54  |
| 1559 | 110.0893 | -52.3115 | 5.98  |
| 1560 | 110.1617 | -52.0859 | 5.38  |
| 1561 | 110.2288 | -26.9638 | 6     |
| 1562 | 110.2429 | -14.3605 | 5.58  |
| 1563 | 110.2681 | -25.8916 | 5.89  |
| 1564 | 110.3229 | 45.2282  | 5.75  |
| 1565 | 110.4869 | 20.44366 | 5.09  |
| 1566 | 110.5109 | 36.76058 | 5.13  |
| 1567 | 110.5145 | 0.177121 | 5.98  |
| 1568 | 110.5564 | -19.0166 | 4.97  |
| 1569 | 110.6058 | -5.98283 | 5.84  |
| 1570 | 110.7169 | 55.28139 | 5.802 |
| 1571 | 110.7529 | -31.9238 | 5.42  |
| 1572 | 110.8688 | 25.05053 | 5.03  |
| 1573 | 110.8708 | -27.8343 | 5.36  |
| 1574 | 110.8829 | -32.2021 | 5.4   |
| 1575 | 111.0238 | -29.3031 | 2.46  |
| 1576 | 111.0353 | 40.67239 | 5.19  |
| 1577 | 111.1394 | 27.63786 | 5.78  |
| 1578 | 111.1674 | -16.2015 | 5.2   |
| 1579 | 111.1827 | -31.8089 | 5.34  |
| 1580 | 111.2379 | 51.88726 | 5.8   |
| 1581 | 111.2424 | 11.66952 | 5.37  |
| 1582 | 111.2846 | -13.752  | 5.79  |
| 1583 | 111.3553 | -25.2178 | 5.79  |
| 1584 | 111.4087 | -79.0942 | 5.53  |
| 1585 | 111.4121 | 9.276097 | 4.99  |
| 1586 | 111.4317 | 27.79808 | 3.79  |
| 1587 | 111.4633 | -5.77496 | 5.97  |
| 1588 | 111.591  | -51.0185 | 5.08  |
| 1589 | 111.6769 | -34.1407 | 5.9   |
| 1590 | 111.6785 | 49.21153 | 4.62  |
| 1591 | 111.7347 | 20.25756 | 5.94  |
| 1592 | 111.7478 | -23.086  | 5.62  |
| 1593 | 111.7833 | -17.8649 | 5.62  |

|      |          |          |      |
|------|----------|----------|------|
| 1594 | 111.7877 | 8.289316 | 2.89 |
| 1595 | 111.9289 | -22.8592 | 5.98 |
| 1596 | 111.9348 | 21.44525 | 5.24 |
| 1597 | 111.9965 | -29.1559 | 5.55 |
| 1598 | 112.0086 | 6.941968 | 5.24 |
| 1599 | 112.0408 | 8.92553  | 4.33 |
| 1600 | 112.2145 | 48.18393 | 5.71 |
| 1601 | 112.2705 | -31.4562 | 5.78 |
| 1602 | 112.2737 | -38.8121 | 5.4  |
| 1603 | 112.278  | 31.78455 | 4.18 |
| 1604 | 112.3076 | -43.3014 | 3.26 |
| 1605 | 112.3278 | -1.90533 | 5.58 |
| 1606 | 112.3352 | 28.11828 | 5.07 |
| 1607 | 112.3421 | -10.3267 | 5.73 |
| 1608 | 112.3568 | -7.55117 | 5.87 |
| 1609 | 112.4491 | 12.00656 | 4.54 |
| 1610 | 112.4532 | 27.91615 | 5.01 |
| 1611 | 112.4642 | -23.0243 | 4.86 |
| 1612 | 112.4832 | 49.67246 | 5.36 |
| 1613 | 112.4988 | -52.6512 | 5.87 |
| 1614 | 112.6288 | -54.3994 | 5.95 |
| 1615 | 112.6775 | -30.9623 | 4.64 |
| 1616 | 112.7196 | 68.46562 | 5.65 |
| 1617 | 112.7686 | 82.41147 | 4.89 |
| 1618 | 112.9517 | 17.08605 | 5.44 |
| 1619 | 113.024  | -8.88133 | 5.93 |
| 1620 | 113.0248 | 1.914481 | 5.24 |
| 1621 | 113.2907 | -24.7107 | 5.85 |
| 1622 | 113.2986 | 3.290379 | 5.59 |
| 1623 | 113.3315 | -19.4125 | 5.63 |
| 1624 | 113.402  | 15.82666 | 5.27 |
| 1625 | 113.4498 | -14.5239 | 4.96 |
| 1626 | 113.4627 | -36.3384 | 5.42 |
| 1627 | 113.5133 | -22.2961 | 4.45 |
| 1628 | 113.5662 | 3.371725 | 5.84 |
| 1629 | 113.5802 | -23.4749 | 5.83 |
| 1630 | 113.645  | -27.0123 | 5.78 |
| 1631 | 113.7867 | 30.96094 | 5.34 |
| 1632 | 113.8454 | -28.3693 | 4.65 |
| 1633 | 113.9155 | -52.5338 | 4.93 |
| 1634 | 113.9806 | 26.89574 | 4.07 |
| 1635 | 114.0162 | -14.4928 | 5.66 |
| 1636 | 114.1318 | 46.18029 | 5.65 |
| 1637 | 114.1446 | 5.862171 | 5.91 |
| 1638 | 114.171  | -19.7023 | 5.71 |
| 1639 | 114.183  | -48.8302 | 5.69 |
| 1640 | 114.196  | 55.75506 | 5.94 |
| 1641 | 114.3195 | -4.11098 | 5.14 |
| 1642 | 114.3421 | -34.9685 | 4.53 |
| 1643 | 114.4744 | 48.77384 | 5.91 |
| 1644 | 114.5752 | -25.3648 | 4.69 |
| 1645 | 114.5759 | -48.6014 | 5.68 |
| 1646 | 114.6369 | 35.04855 | 5.58 |
| 1647 | 114.6829 | -36.4968 | 5.78 |
| 1648 | 114.7914 | 34.58435 | 4.89 |
| 1649 | 114.8255 | 5.224993 | 0.4  |
| 1650 | 114.8639 | -38.308  | 4.84 |
| 1651 | 114.8691 | 17.67452 | 5.04 |
| 1652 | 114.9326 | -38.1393 | 5.76 |

|      |          |          |      |
|------|----------|----------|------|
| 1653 | 114.9495 | -38.2607 | 5.76 |
| 1654 | 115.0564 | -19.6609 | 5.93 |
| 1655 | 115.0612 | 38.34454 | 5.76 |
| 1656 | 115.0967 | -15.2639 | 4.97 |
| 1657 | 115.127  | 87.02009 | 5.05 |
| 1658 | 115.2438 | 23.01853 | 5.92 |
| 1659 | 115.3017 | 48.13153 | 5.59 |
| 1660 | 115.3118 | -9.55113 | 3.94 |
| 1661 | 115.3159 | -38.5335 | 5.41 |
| 1662 | 115.3965 | 3.624779 | 5.96 |
| 1663 | 115.4553 | -72.6061 | 3.95 |
| 1664 | 115.466  | 13.48045 | 5.8  |
| 1665 | 115.5134 | 14.2085  | 5.57 |
| 1666 | 115.7006 | -26.3513 | 5.63 |
| 1667 | 115.7379 | -45.1731 | 5.05 |
| 1668 | 115.7517 | 58.71036 | 4.96 |
| 1669 | 115.7999 | -36.0501 | 5.6  |
| 1670 | 115.828  | 28.88351 | 4.25 |
| 1671 | 115.8849 | -28.4109 | 4.61 |
| 1672 | 115.9247 | -40.9337 | 5.12 |
| 1673 | 115.952  | -28.9548 | 3.98 |
| 1674 | 116.0174 | 50.43379 | 5.33 |
| 1675 | 116.0288 | 25.78416 | 5.29 |
| 1676 | 116.0404 | -36.0625 | 5.8  |
| 1677 | 116.1119 | 24.39799 | 3.57 |
| 1678 | 116.1424 | -24.6741 | 5.61 |
| 1679 | 116.1424 | -37.9429 | 5.89 |
| 1680 | 116.3137 | -37.9686 | 3.62 |
| 1681 | 116.329  | 28.0262  | 1.22 |
| 1682 | 116.3959 | -34.1724 | 5.36 |
| 1683 | 116.487  | -14.5638 | 5.04 |
| 1684 | 116.5091 | -6.77251 | 5.5  |
| 1685 | 116.531  | 18.51004 | 4.87 |
| 1686 | 116.5439 | -37.9337 | 5.87 |
| 1687 | 116.5675 | 10.76825 | 5.25 |
| 1688 | 116.6637 | 37.51739 | 5.17 |
| 1689 | 116.667  | 65.45568 | 5.94 |
| 1690 | 116.8023 | -22.5195 | 5.9  |
| 1691 | 116.8541 | -38.5111 | 5.08 |
| 1692 | 116.8763 | 33.4157  | 5.14 |
| 1693 | 116.8813 | -46.6085 | 5.23 |
| 1694 | 117.0215 | -25.9372 | 4.5  |
| 1695 | 117.084  | -47.0777 | 4.69 |
| 1696 | 117.257  | -24.9122 | 5.32 |
| 1697 | 117.278  | -56.4104 | 5.58 |
| 1698 | 117.3036 | -46.8577 | 5.82 |
| 1699 | 117.3038 | -60.2837 | 5.78 |
| 1700 | 117.3096 | -46.3732 | 4.11 |
| 1701 | 117.311  | -35.2433 | 5.94 |
| 1702 | 117.3236 | -24.8598 | 3.33 |
| 1703 | 117.3975 | -33.289  | 5.6  |
| 1704 | 117.4208 | -66.196  | 5.78 |
| 1705 | 117.4217 | -17.2284 | 5.17 |
| 1706 | 117.5441 | -9.18344 | 5.6  |
| 1707 | 117.5993 | -50.5095 | 5.9  |
| 1708 | 117.925  | 1.766868 | 5.13 |
| 1709 | 117.9293 | -21.1737 | 5.61 |
| 1710 | 117.9429 | -13.898  | 5.17 |
| 1711 | 118.0543 | -40.5758 | 3.72 |

|      |          |          |      |
|------|----------|----------|------|
| 1712 | 118.0653 | -34.7054 | 5.01 |
| 1713 | 118.0787 | -14.8462 | 5.69 |
| 1714 | 118.1239 | -54.3672 | 5.69 |
| 1715 | 118.161  | -38.8628 | 4.49 |
| 1716 | 118.1994 | -5.42827 | 5.77 |
| 1717 | 118.2646 | -36.3638 | 5.43 |
| 1718 | 118.2651 | -49.613  | 4.62 |
| 1719 | 118.3257 | -48.1029 | 4.25 |
| 1720 | 118.3742 | 26.76578 | 4.98 |
| 1721 | 118.5459 | -35.8773 | 5.48 |
| 1722 | 118.6779 | 47.5646  | 5.45 |
| 1723 | 118.7222 | -57.3028 | 5.61 |
| 1724 | 118.881  | 8.862839 | 5.86 |
| 1725 | 118.9162 | 19.88397 | 5.38 |
| 1726 | 119.0777 | -60.5264 | 5.73 |
| 1727 | 119.1946 | -52.9824 | 3.46 |
| 1728 | 119.2147 | -22.8801 | 4.2  |
| 1729 | 119.2408 | -43.5004 | 5.35 |
| 1730 | 119.2477 | 15.79028 | 5.81 |
| 1731 | 119.3268 | -44.1099 | 5.08 |
| 1732 | 119.4171 | -30.3346 | 4.79 |
| 1733 | 119.4455 | -60.3031 | 5.6  |
| 1734 | 119.4655 | -45.5777 | 5.12 |
| 1735 | 119.5602 | -49.2449 | 4.47 |
| 1736 | 119.5861 | 2.224767 | 5.29 |
| 1737 | 119.7106 | -60.8245 | 5.78 |
| 1738 | 119.7575 | -45.2158 | 5.97 |
| 1739 | 119.7738 | -23.3104 | 5.09 |
| 1740 | 119.8682 | -39.297  | 5.23 |
| 1741 | 119.9064 | -60.5871 | 5.21 |
| 1742 | 119.934  | -3.67958 | 4.94 |
| 1743 | 119.9669 | -18.3992 | 4.61 |
| 1744 | 120.0489 | 73.91792 | 5.35 |
| 1745 | 120.0832 | -63.5675 | 4.81 |
| 1746 | 120.1971 | 17.3087  | 5.59 |
| 1747 | 120.2081 | -54.1513 | 5.85 |
| 1748 | 120.2328 | 25.39284 | 5.86 |
| 1749 | 120.3056 | -1.39261 | 4.68 |
| 1750 | 120.3079 | 4.879824 | 5.65 |
| 1751 | 120.3366 | 59.0474  | 5.78 |
| 1752 | 120.3762 | 16.45531 | 5.99 |
| 1753 | 120.4064 | -37.2837 | 5.91 |
| 1754 | 120.5664 | 2.334571 | 4.39 |
| 1755 | 120.6866 | -41.3098 | 5.51 |
| 1756 | 120.7673 | -32.4635 | 5.81 |
| 1757 | 120.8795 | 27.79433 | 4.94 |
| 1758 | 120.896  | -40.0031 | 2.22 |
| 1759 | 121.0675 | -32.6748 | 5.23 |
| 1760 | 121.1767 | -50.5904 | 5.96 |
| 1761 | 121.1961 | 79.47961 | 5.4  |
| 1762 | 121.2655 | -53.1079 | 5.51 |
| 1763 | 121.2687 | 13.11822 | 5.15 |
| 1764 | 121.5766 | 22.63549 | 5.98 |
| 1765 | 121.6681 | -45.266  | 5.02 |
| 1766 | 121.8252 | -20.5543 | 5.34 |
| 1767 | 121.886  | -24.3043 | 2.83 |
| 1768 | 121.9411 | 21.58182 | 5.3  |
| 1769 | 121.9825 | -68.6171 | 4.4  |
| 1770 | 122.1144 | 51.50667 | 4.8  |

|      |          |          |      |
|------|----------|----------|------|
| 1771 | 122.1485 | -2.98379 | 4.36 |
| 1772 | 122.2528 | -61.3024 | 4.75 |
| 1773 | 122.2568 | -19.245  | 4.4  |
| 1774 | 122.2896 | -48.6844 | 5.67 |
| 1775 | 122.3689 | -16.2489 | 5.66 |
| 1776 | 122.3901 | -56.0854 | 5.66 |
| 1777 | 122.3996 | -44.1228 | 5.19 |
| 1778 | 122.4298 | -47.9372 | 5.23 |
| 1779 | 122.5157 | 58.24824 | 5.9  |
| 1780 | 122.6133 | 25.50733 | 5.73 |
| 1781 | 122.6659 | -13.7992 | 5.53 |
| 1782 | 122.795  | -48.462  | 5.82 |
| 1783 | 122.8179 | -12.927  | 4.72 |
| 1784 | 122.8396 | -39.6185 | 4.42 |
| 1785 | 122.8579 | -42.9873 | 4.76 |
| 1786 | 122.8875 | -7.77254 | 5.35 |
| 1787 | 122.9999 | -46.6444 | 5.76 |
| 1788 | 123.053  | 17.64777 | 5.63 |
| 1789 | 123.2033 | 68.47407 | 5.33 |
| 1790 | 123.2869 | 29.65654 | 5.62 |
| 1791 | 123.3332 | -15.7882 | 4.99 |
| 1792 | 123.373  | -35.8995 | 4.78 |
| 1793 | 123.3927 | -50.1961 | 5.52 |
| 1794 | 123.4006 | -46.9916 | 5.14 |
| 1795 | 123.4591 | 56.45225 | 5.85 |
| 1796 | 123.493  | -36.3223 | 5.08 |
| 1797 | 123.5122 | -40.3479 | 4.43 |
| 1798 | 123.5552 | -35.49   | 5.77 |
| 1799 | 123.5995 | -45.8345 | 5.85 |
| 1800 | 123.8163 | -62.9156 | 5.25 |
| 1801 | 124.1288 | 9.185545 | 3.52 |
| 1802 | 124.4601 | 59.57113 | 5.64 |
| 1803 | 124.5725 | -35.4517 | 5.58 |
| 1804 | 124.5784 | -65.6132 | 5.06 |
| 1805 | 124.5998 | -12.6322 | 5.95 |
| 1806 | 124.6315 | -76.9197 | 4.06 |
| 1807 | 124.6388 | -36.6593 | 4.45 |
| 1808 | 124.8215 | 62.50716 | 5.73 |
| 1809 | 124.8845 | 75.75691 | 5.56 |
| 1810 | 125.0161 | 27.21771 | 5.13 |
| 1811 | 125.0874 | 20.74772 | 5.8  |
| 1812 | 125.1086 | 57.74328 | 5.89 |
| 1813 | 125.1339 | 24.02231 | 5.92 |
| 1814 | 125.1606 | -77.4845 | 4.34 |
| 1815 | 125.168  | 72.40723 | 5.98 |
| 1816 | 125.3004 | -57.9732 | 5.96 |
| 1817 | 125.3377 | -36.4842 | 5.18 |
| 1818 | 125.3384 | -20.0791 | 5.58 |
| 1819 | 125.3459 | -33.0544 | 4.82 |
| 1820 | 125.4775 | -17.5863 | 5.71 |
| 1821 | 125.5186 | -73.4    | 5.29 |
| 1822 | 125.6285 | -59.5095 | 1.95 |
| 1823 | 125.6321 | -48.4904 | 4.83 |
| 1824 | 125.7081 | -26.3482 | 5.89 |
| 1825 | 125.7088 | 43.18813 | 4.24 |
| 1826 | 125.7254 | -7.54312 | 5.94 |
| 1827 | 125.7298 | -52.1237 | 5.9  |
| 1828 | 125.841  | 18.3322  | 5.94 |
| 1829 | 125.9521 | 53.21971 | 5.52 |

|      |          |          |      |
|------|----------|----------|------|
| 1830 | 126.0826 | -80.9142 | 5.69 |
| 1831 | 126.1459 | -3.75124 | 5.62 |
| 1832 | 126.2299 | -23.1537 | 5.67 |
| 1833 | 126.2384 | -42.7698 | 5.97 |
| 1834 | 126.2656 | -24.0462 | 5.29 |
| 1835 | 126.3292 | -21.046  | 6    |
| 1836 | 126.3805 | -51.7274 | 5.17 |
| 1837 | 126.3981 | 2.102209 | 5.72 |
| 1838 | 126.4151 | -3.90642 | 3.89 |
| 1839 | 126.4341 | -66.1369 | 3.77 |
| 1840 | 126.465  | -64.6006 | 5.94 |
| 1841 | 126.4663 | -42.1531 | 5.45 |
| 1842 | 126.4782 | 7.564506 | 5.12 |
| 1843 | 126.4816 | -14.9297 | 5.96 |
| 1844 | 126.6134 | -3.98748 | 5.59 |
| 1845 | 126.6154 | 27.89358 | 5.58 |
| 1846 | 126.6748 | -12.5346 | 5.52 |
| 1847 | 126.6831 | 12.65461 | 5.58 |
| 1848 | 126.8198 | -70.0935 | 5.52 |
| 1849 | 126.9024 | -53.0885 | 5.08 |
| 1850 | 126.9976 | -35.1138 | 5.75 |
| 1851 | 127.1556 | 14.21082 | 5.96 |
| 1852 | 127.2125 | -9.74858 | 6    |
| 1853 | 127.2698 | -47.9289 | 5.33 |
| 1854 | 127.2816 | -44.1604 | 5.84 |
| 1855 | 127.3645 | -44.7248 | 5.19 |
| 1856 | 127.4401 | -46.3317 | 5.98 |
| 1857 | 127.4425 | 67.29744 | 5.88 |
| 1858 | 127.5661 | 60.71817 | 3.36 |
| 1859 | 127.6192 | -32.1593 | 5.6  |
| 1860 | 127.8772 | 24.08111 | 5.7  |
| 1861 | 127.8789 | -19.5775 | 5.42 |
| 1862 | 127.8989 | 18.09442 | 5.35 |
| 1863 | 128.1771 | 20.44116 | 5.34 |
| 1864 | 128.2291 | 38.01637 | 5.88 |
| 1865 | 128.4101 | -38.8488 | 5.92 |
| 1866 | 128.4312 | 4.757    | 5.86 |
| 1867 | 128.5067 | -2.15155 | 5.8  |
| 1868 | 128.6505 | 65.14517 | 5.46 |
| 1869 | 128.6817 | -49.9442 | 4.98 |
| 1870 | 128.6829 | 36.41962 | 5.76 |
| 1871 | 128.8148 | -58.2247 | 5.25 |
| 1872 | 128.8321 | -58.0092 | 4.85 |
| 1873 | 128.8675 | -7.98229 | 5.73 |
| 1874 | 128.8696 | -26.8435 | 5.95 |
| 1875 | 128.9624 | 6.62022  | 5.91 |
| 1876 | 128.9668 | -50.9697 | 5.79 |
| 1877 | 129.274  | 9.65558  | 5.92 |
| 1878 | 129.3285 | -62.8535 | 5.46 |
| 1879 | 129.411  | -42.9891 | 4.14 |
| 1880 | 129.414  | 5.703782 | 4.14 |
| 1881 | 129.4673 | -26.255  | 5.25 |
| 1882 | 129.5791 | 32.80202 | 5.96 |
| 1883 | 129.5924 | 53.40154 | 5.66 |
| 1884 | 129.6893 | 3.341435 | 4.45 |
| 1885 | 129.7715 | -70.3867 | 5.19 |
| 1886 | 129.7988 | 65.02091 | 5.64 |
| 1887 | 129.8234 | 52.71162 | 5.91 |
| 1888 | 129.8493 | -53.4398 | 5.45 |

|      |          |          |      |
|------|----------|----------|------|
| 1889 | 129.927  | -29.5611 | 4.88 |
| 1890 | 129.99   | -53.0547 | 5.18 |
| 1891 | 130.0061 | -12.4754 | 4.97 |
| 1892 | 130.0256 | -35.3084 | 3.97 |
| 1893 | 130.0534 | 64.32794 | 4.59 |
| 1894 | 130.0728 | -53.0154 | 5.56 |
| 1895 | 130.0733 | -52.9219 | 3.6  |
| 1896 | 130.0799 | -40.2639 | 5.21 |
| 1897 | 130.1469 | -45.1911 | 5.67 |
| 1898 | 130.1543 | -59.761  | 4.33 |
| 1899 | 130.1565 | -46.6487 | 3.81 |
| 1900 | 130.2545 | 45.83401 | 5.37 |
| 1901 | 130.2722 | -48.9227 | 5.89 |
| 1902 | 130.3047 | -47.3171 | 4.77 |
| 1903 | 130.3313 | -78.9634 | 5.46 |
| 1904 | 130.4306 | -15.9434 | 4.87 |
| 1905 | 130.4871 | -45.4107 | 5.24 |
| 1906 | 130.5675 | -48.0991 | 5.48 |
| 1907 | 130.8014 | 12.68088 | 5.63 |
| 1908 | 130.8061 | 3.398662 | 4.29 |
| 1909 | 130.8214 | 21.4685  | 4.67 |
| 1910 | 130.8981 | -33.1864 | 3.69 |
| 1911 | 130.9178 | -49.8228 | 5.15 |
| 1912 | 130.9182 | -7.23373 | 4.64 |
| 1913 | 131.0998 | -42.6493 | 4.06 |
| 1914 | 131.1712 | 18.15431 | 3.93 |
| 1915 | 131.1759 | -54.7088 | 1.94 |
| 1916 | 131.1877 | 10.08167 | 5.63 |
| 1917 | 131.2164 | -37.1472 | 5.74 |
| 1918 | 131.4798 | -79.5044 | 5.78 |
| 1919 | 131.5069 | -46.0415 | 3.9  |
| 1920 | 131.5103 | -2.04865 | 5.69 |
| 1921 | 131.5939 | -13.5477 | 4.32 |
| 1922 | 131.6273 | -45.9125 | 5.47 |
| 1923 | 131.6743 | 28.7599  | 4.02 |
| 1924 | 131.6773 | -56.7698 | 4.5  |
| 1925 | 131.6938 | 6.418809 | 3.4  |
| 1926 | 131.7334 | 12.10995 | 5.89 |
| 1927 | 131.8124 | -1.89703 | 5.28 |
| 1928 | 131.8285 | -46.1554 | 5.75 |
| 1929 | 132.1082 | 5.837813 | 4.35 |
| 1930 | 132.3405 | -3.44302 | 5.3  |
| 1931 | 132.4132 | -40.3202 | 5.47 |
| 1932 | 132.4485 | -45.3079 | 4.95 |
| 1933 | 132.4646 | -32.7805 | 5.2  |
| 1934 | 132.5093 | -29.463  | 5.87 |
| 1935 | 132.5876 | -42.0898 | 6    |
| 1936 | 132.633  | -27.7098 | 4.02 |
| 1937 | 132.6394 | -46.5292 | 5.11 |
| 1938 | 132.6451 | -66.793  | 5.34 |
| 1939 | 132.8934 | -7.17723 | 5.57 |
| 1940 | 132.9021 | -57.6336 | 5.59 |
| 1941 | 132.9868 | 43.7266  | 5.15 |
| 1942 | 133.0418 | 42.00273 | 5.98 |
| 1943 | 133.049  | 45.31282 | 5.96 |
| 1944 | 133.1443 | 32.47416 | 5.67 |
| 1945 | 133.1492 | 28.33082 | 5.95 |
| 1946 | 133.1609 | -48.3591 | 5.9  |
| 1947 | 133.2001 | -38.7241 | 5.81 |

|      |          |          |      |
|------|----------|----------|------|
| 1948 | 133.344  | 61.96227 | 5.72 |
| 1949 | 133.4527 | -60.3539 | 5.78 |
| 1950 | 133.4608 | -47.5208 | 5.31 |
| 1951 | 133.5614 | 30.57912 | 5.42 |
| 1952 | 133.5748 | -5.43446 | 6    |
| 1953 | 133.7618 | -60.6446 | 3.84 |
| 1954 | 133.7991 | -54.9658 | 5.71 |
| 1955 | 133.8018 | -18.2412 | 5.74 |
| 1956 | 133.8484 | 5.945563 | 3.12 |
| 1957 | 133.8815 | -27.6819 | 4.88 |
| 1958 | 133.9153 | 27.92748 | 5.23 |
| 1959 | 133.9815 | 11.62602 | 5.44 |
| 1960 | 134.0803 | -52.7235 | 4.71 |
| 1961 | 134.1271 | 40.20147 | 5.9  |
| 1962 | 134.1422 | -16.7087 | 5.95 |
| 1963 | 134.156  | 64.60383 | 5.57 |
| 1964 | 134.1708 | -85.6632 | 5.43 |
| 1965 | 134.2081 | 45.63165 | 5.73 |
| 1966 | 134.2358 | 32.91043 | 5.44 |
| 1967 | 134.2434 | -59.2293 | 4.91 |
| 1968 | 134.3123 | 15.32276 | 5.23 |
| 1969 | 134.3967 | 15.58128 | 5.69 |
| 1970 | 134.4815 | -48.5729 | 5.88 |
| 1971 | 134.6218 | 11.8577  | 4.26 |
| 1972 | 134.6831 | -16.1327 | 5.82 |
| 1973 | 134.7181 | -47.2347 | 5.17 |
| 1974 | 134.8019 | 48.04183 | 3.14 |
| 1975 | 134.8508 | -59.0837 | 5.16 |
| 1976 | 134.8861 | 32.41856 | 5.23 |
| 1977 | 135.0225 | -41.2536 | 4.46 |
| 1978 | 135.1599 | 41.78291 | 3.97 |
| 1979 | 135.1906 | -60.9638 | 5.79 |
| 1980 | 135.2855 | -68.6839 | 5.89 |
| 1981 | 135.3369 | -41.8643 | 5.55 |
| 1982 | 135.3505 | 32.2523  | 5.95 |
| 1983 | 135.4357 | -52.1887 | 5.26 |
| 1984 | 135.4916 | -0.48267 | 5.63 |
| 1985 | 135.6116 | -66.3961 | 4    |
| 1986 | 135.6362 | 67.62962 | 4.77 |
| 1987 | 135.6844 | 24.45292 | 5.46 |
| 1988 | 135.6867 | 7.298267 | 5.85 |
| 1989 | 135.9064 | 47.15653 | 3.58 |
| 1990 | 136.0017 | 54.28389 | 5.74 |
| 1991 | 136.0387 | -47.0977 | 3.75 |
| 1992 | 136.2867 | -72.6027 | 4.47 |
| 1993 | 136.3504 | 48.53031 | 5.48 |
| 1994 | 136.4099 | -70.5385 | 4.67 |
| 1995 | 136.4932 | 5.092316 | 4.99 |
| 1996 | 136.6324 | 38.45222 | 4.56 |
| 1997 | 136.9367 | 10.66819 | 5.25 |
| 1998 | 136.999  | -43.4326 | 2.21 |
| 1999 | 137.0002 | 29.65424 | 5.42 |
| 2000 | 137.012  | -25.8585 | 4.61 |
| 2001 | 137.0979 | 66.87323 | 5.14 |
| 2002 | 137.1757 | -8.58952 | 5.62 |
| 2003 | 137.1972 | 26.62911 | 5.96 |
| 2004 | 137.2128 | 33.88222 | 5.95 |
| 2005 | 137.2177 | 51.60465 | 4.46 |
| 2006 | 137.2675 | -18.3285 | 5.73 |

|      |          |          |      |
|------|----------|----------|------|
| 2007 | 137.298  | -12.3577 | 5.77 |
| 2008 | 137.3397 | 22.04545 | 5.15 |
| 2009 | 137.3982 | -8.78765 | 5.46 |
| 2010 | 137.485  | -30.3654 | 5.6  |
| 2011 | 137.5981 | 67.13402 | 4.82 |
| 2012 | 137.7294 | 63.51363 | 4.64 |
| 2013 | 137.742  | -58.9669 | 3.43 |
| 2014 | 137.7683 | -44.8679 | 5.02 |
| 2015 | 137.8197 | -62.317  | 3.96 |
| 2016 | 137.8891 | -46.5839 | 5.78 |
| 2017 | 137.9947 | -19.7476 | 5.72 |
| 2018 | 138.1272 | -43.6133 | 5.56 |
| 2019 | 138.2318 | -59.4139 | 5.54 |
| 2020 | 138.2999 | -69.7172 | 1.67 |
| 2021 | 138.3936 | -47.3384 | 5.91 |
| 2022 | 138.4509 | 43.21782 | 5.3  |
| 2023 | 138.5342 | -44.1458 | 5.85 |
| 2024 | 138.575  | -55.5696 | 5.26 |
| 2025 | 138.5856 | 61.42332 | 5.19 |
| 2026 | 138.5911 | 2.31428  | 3.89 |
| 2027 | 138.602  | -43.2275 | 5.25 |
| 2028 | 138.7382 | -37.6024 | 5.86 |
| 2029 | 138.8077 | 14.94151 | 5.35 |
| 2030 | 138.8094 | 34.63352 | 5.99 |
| 2031 | 138.8235 | -58.3884 | 6    |
| 2032 | 138.903  | -38.5699 | 4.92 |
| 2033 | 138.9378 | -37.4131 | 4.63 |
| 2034 | 138.9574 | 56.74141 | 5.28 |
| 2035 | 138.9691 | 72.94633 | 5.94 |
| 2036 | 139.0472 | 54.02186 | 4.82 |
| 2037 | 139.0503 | -57.5415 | 4.33 |
| 2038 | 139.096  | -44.2657 | 5.11 |
| 2039 | 139.1724 | -8.74476 | 5.48 |
| 2040 | 139.1739 | -6.35314 | 5.23 |
| 2041 | 139.2378 | -39.4015 | 5.31 |
| 2042 | 139.2725 | -59.2752 | 2.25 |
| 2043 | 139.2822 | -14.5741 | 5.84 |
| 2044 | 139.3218 | -68.6896 | 5.39 |
| 2045 | 139.355  | -74.8943 | 5.31 |
| 2046 | 139.3649 | -74.7346 | 5.87 |
| 2047 | 139.3799 | 46.81723 | 5.95 |
| 2048 | 139.5245 | -51.0509 | 5.26 |
| 2049 | 139.608  | 35.36408 | 5.94 |
| 2050 | 139.6765 | -51.5607 | 5.9  |
| 2051 | 139.711  | 36.8026  | 3.82 |
| 2052 | 139.8881 | -15.8347 | 5.8  |
| 2053 | 139.9433 | -11.9749 | 4.78 |
| 2054 | 140.1209 | -9.55569 | 4.81 |
| 2055 | 140.2367 | -62.4046 | 4.8  |
| 2056 | 140.2638 | 34.39256 | 3.13 |
| 2057 | 140.3733 | -25.9654 | 4.71 |
| 2058 | 140.4304 | 56.69922 | 5.86 |
| 2059 | 140.4585 | -55.5147 | 5.62 |
| 2060 | 140.4624 | -42.1949 | 5.58 |
| 2061 | 140.5284 | -55.0107 | 2.48 |
| 2062 | 140.6    | -46.0474 | 5.73 |
| 2063 | 140.801  | -28.8339 | 4.72 |
| 2064 | 141.0229 | -61.6489 | 5.99 |
| 2065 | 141.0384 | -80.7869 | 5.34 |

|      |          |          |      |
|------|----------|----------|------|
| 2066 | 141.1636 | 26.18232 | 4.47 |
| 2067 | 141.3501 | -5.11739 | 5.58 |
| 2068 | 141.3635 | -61.9505 | 5.78 |
| 2069 | 141.5748 | -53.3789 | 5.1  |
| 2070 | 141.593  | -1.46408 | 5.99 |
| 2071 | 141.7763 | -71.6019 | 5.46 |
| 2072 | 141.8267 | -22.3438 | 4.73 |
| 2073 | 141.8968 | -8.6586  | 1.99 |
| 2074 | 141.9449 | -6.07119 | 5.39 |
| 2075 | 142.1142 | 9.056778 | 5.42 |
| 2076 | 142.1216 | 8.188298 | 5.71 |
| 2077 | 142.1273 | -66.7019 | 5.9  |
| 2078 | 142.1666 | 45.60148 | 5.41 |
| 2079 | 142.1963 | -62.2731 | 5.9  |
| 2080 | 142.2871 | -2.76896 | 4.92 |
| 2081 | 142.3027 | -20.7491 | 5.64 |
| 2082 | 142.3113 | -35.9513 | 4.49 |
| 2083 | 142.4771 | -26.5896 | 5.49 |
| 2084 | 142.5213 | -51.5172 | 5.45 |
| 2085 | 142.5937 | -15.5774 | 5.85 |
| 2086 | 142.5976 | -58.3618 | 5.91 |
| 2087 | 142.675  | -40.4668 | 3.59 |
| 2088 | 142.6801 | 33.65571 | 5.86 |
| 2089 | 142.8055 | -57.0344 | 3.16 |
| 2090 | 142.8821 | 63.06186 | 3.65 |
| 2091 | 142.884  | -31.8718 | 5.91 |
| 2092 | 142.885  | 35.10327 | 5.38 |
| 2093 | 142.8877 | -35.7148 | 5.85 |
| 2094 | 142.9011 | -73.0809 | 5.47 |
| 2095 | 142.9301 | 22.96797 | 4.3  |
| 2096 | 142.9864 | 11.29983 | 4.97 |
| 2097 | 142.9899 | 9.715767 | 5.07 |
| 2098 | 142.9955 | -1.18466 | 4.55 |
| 2099 | 143.0803 | -40.6493 | 5.36 |
| 2100 | 143.085  | -19.4003 | 5.75 |
| 2101 | 143.2143 | 51.6773  | 3.18 |
| 2102 | 143.2324 | -13.5168 | 5.95 |
| 2103 | 143.3019 | -21.1157 | 5    |
| 2104 | 143.3585 | -22.8639 | 5.91 |
| 2105 | 143.4356 | -49.0051 | 5.12 |
| 2106 | 143.4724 | -80.9413 | 5.07 |
| 2107 | 143.5366 | -51.2553 | 5.01 |
| 2108 | 143.5558 | 36.39756 | 4.55 |
| 2109 | 143.611  | -59.2298 | 4.1  |
| 2110 | 143.6202 | 69.83034 | 4.56 |
| 2111 | 143.636  | -5.91495 | 5.56 |
| 2112 | 143.706  | 52.05148 | 4.48 |
| 2113 | 143.723  | 72.20568 | 5.77 |
| 2114 | 143.766  | 39.62149 | 4.81 |
| 2115 | 143.9146 | 35.81013 | 5.39 |
| 2116 | 144.1786 | 31.16173 | 5.57 |
| 2117 | 144.2064 | -49.355  | 4.34 |
| 2118 | 144.2509 | -25.2968 | 5.68 |
| 2119 | 144.2608 | 16.43795 | 5.73 |
| 2120 | 144.272  | 81.32638 | 4.26 |
| 2121 | 144.2912 | -32.1786 | 5.62 |
| 2122 | 144.3027 | -53.6685 | 5.47 |
| 2123 | 144.3028 | 6.835802 | 5.01 |
| 2124 | 144.3683 | -36.096  | 5.95 |

|      |          |          |      |
|------|----------|----------|------|
| 2125 | 144.5061 | -43.1909 | 5.5  |
| 2126 | 144.5907 | 40.23979 | 5.29 |
| 2127 | 144.6137 | 4.649293 | 4.67 |
| 2128 | 144.8375 | -61.3281 | 4.52 |
| 2129 | 144.8661 | 67.27223 | 5.95 |
| 2130 | 144.964  | -1.14281 | 3.9  |
| 2131 | 145.0765 | -14.3323 | 5.06 |
| 2132 | 145.1773 | -57.9835 | 5.31 |
| 2133 | 145.2591 | -57.2595 | 5.8  |
| 2134 | 145.2876 | 9.892308 | 3.53 |
| 2135 | 145.3209 | -23.5915 | 4.77 |
| 2136 | 145.3963 | 31.27782 | 5.88 |
| 2137 | 145.4497 | -55.2138 | 5.98 |
| 2138 | 145.5014 | 39.75785 | 5.61 |
| 2139 | 145.5601 | -23.9156 | 4.92 |
| 2140 | 145.5618 | 69.23754 | 5.72 |
| 2141 | 145.7383 | 72.25262 | 5.14 |
| 2142 | 145.8886 | 29.97447 | 5.64 |
| 2143 | 145.926  | -53.8913 | 5.55 |
| 2144 | 145.9329 | 14.02169 | 5.37 |
| 2145 | 146.0504 | -27.7695 | 4.79 |
| 2146 | 146.3117 | -62.5079 | 3.69 |
| 2147 | 146.4628 | 23.77425 | 2.97 |
| 2148 | 146.5419 | 6.708556 | 5.8  |
| 2149 | 146.586  | -76.7761 | 5.44 |
| 2150 | 146.5972 | 11.81004 | 5.66 |
| 2151 | 146.5984 | 1.785586 | 5.65 |
| 2152 | 146.6265 | -44.7551 | 5.56 |
| 2153 | 146.6319 | 57.12807 | 5.13 |
| 2154 | 147.1474 | 46.02101 | 5.09 |
| 2155 | 147.367  | -37.1868 | 5.95 |
| 2156 | 147.4881 | -45.7327 | 5.1  |
| 2157 | 147.6747 | -46.9339 | 5.72 |
| 2158 | 147.7316 | -62.7451 | 5.55 |
| 2159 | 147.7473 | 59.03874 | 3.78 |
| 2160 | 147.8003 | -59.4258 | 5.78 |
| 2161 | 147.8322 | -46.1939 | 5.62 |
| 2162 | 147.8696 | -14.8466 | 4.11 |
| 2163 | 147.9194 | -46.5476 | 4.58 |
| 2164 | 147.971  | 24.39537 | 5.29 |
| 2165 | 148.0266 | 54.06435 | 4.56 |
| 2166 | 148.1268 | -8.10503 | 5.08 |
| 2167 | 148.1909 | 26.00695 | 3.88 |
| 2168 | 148.4289 | 5.958573 | 5.94 |
| 2169 | 148.4587 | -51.1467 | 5.94 |
| 2170 | 148.5513 | -25.9323 | 4.87 |
| 2171 | 148.5736 | -45.2835 | 5.8  |
| 2172 | 148.7135 | -50.244  | 5.72 |
| 2173 | 148.7175 | -19.0094 | 4.93 |
| 2174 | 148.9292 | 49.81984 | 5.28 |
| 2175 | 149.1082 | 8.933157 | 5.85 |
| 2176 | 149.1479 | -33.4185 | 5.83 |
| 2177 | 149.2156 | -54.5678 | 3.54 |
| 2178 | 149.3067 | 57.4182  | 5.97 |
| 2179 | 149.4211 | 41.05563 | 5.11 |
| 2180 | 149.5557 | 12.4448  | 5.26 |
| 2181 | 149.5949 | 72.87951 | 5.84 |
| 2182 | 149.7178 | -35.891  | 5.23 |
| 2183 | 149.9009 | 29.64523 | 5.75 |

|      |          |          |       |
|------|----------|----------|-------|
| 2184 | 149.9654 | 56.81181 | 5.49  |
| 2185 | 150.0534 | 8.044223 | 4.67  |
| 2186 | 150.1825 | -82.2147 | 5.52  |
| 2187 | 150.2527 | 31.92367 | 5.38  |
| 2188 | 150.5004 | -60.4209 | 5.94  |
| 2189 | 150.704  | 21.94926 | 5.67  |
| 2190 | 151.0873 | -24.2855 | 5.71  |
| 2191 | 151.1513 | 53.89172 | 5.72  |
| 2192 | 151.2811 | -13.0646 | 4.6   |
| 2193 | 151.5467 | -47.37   | 5.09  |
| 2194 | 151.7896 | -17.1417 | 5.58  |
| 2195 | 151.8331 | 16.76266 | 3.52  |
| 2196 | 151.8573 | 35.24469 | 4.49  |
| 2197 | 151.9761 | 9.997508 | 4.37  |
| 2198 | 151.9845 | -0.37164 | 4.48  |
| 2199 | 152.093  | 11.96721 | 1.41  |
| 2200 | 152.1781 | -65.8154 | 5.26  |
| 2201 | 152.2343 | -51.8113 | 4.86  |
| 2202 | 152.3757 | -68.6828 | 5.83  |
| 2203 | 152.5245 | -12.8159 | 5.3   |
| 2204 | 152.5314 | -8.40817 | 5.9   |
| 2205 | 152.647  | -12.3541 | 3.61  |
| 2206 | 152.6572 | -41.7152 | 5.98  |
| 2207 | 152.7328 | -8.41846 | 5.62  |
| 2208 | 152.8032 | 37.4019  | 5.84  |
| 2209 | 152.9436 | -58.0605 | 5.77  |
| 2210 | 153.2015 | 4.61468  | 5.78  |
| 2211 | 153.3452 | -51.233  | 5.28  |
| 2212 | 153.3666 | -51.7558 | 5.79  |
| 2213 | 153.3776 | -66.3728 | 5.15  |
| 2214 | 153.4342 | -70.0379 | 3.3   |
| 2215 | 153.4413 | -40.3461 | 5.91  |
| 2216 | 153.684  | -42.1219 | 3.84  |
| 2217 | 153.8815 | -43.1124 | 5.57  |
| 2218 | 154.0601 | 29.3105  | 5.49  |
| 2219 | 154.1345 | 23.5031  | 5.97  |
| 2220 | 154.1697 | 13.72833 | 5.42  |
| 2221 | 154.1726 | 23.41731 | 3.44  |
| 2222 | 154.174  | 25.37071 | 5.84  |
| 2223 | 154.2707 | -61.3323 | 3.37  |
| 2224 | 154.2741 | 42.91437 | 3.44  |
| 2225 | 154.3106 | 23.10622 | 5.82  |
| 2226 | 154.4075 | -8.06891 | 5.24  |
| 2227 | 154.5084 | 65.10835 | 5.75  |
| 2228 | 154.5316 | -28.992  | 5.52  |
| 2229 | 154.6177 | -41.6685 | 5.97  |
| 2230 | 154.658  | -56.1104 | 5.81  |
| 2231 | 154.8616 | 48.39676 | 6     |
| 2232 | 154.9031 | -55.0293 | 4.56  |
| 2233 | 154.934  | 19.47091 | 4.78  |
| 2234 | 155.0696 | -47.6991 | 5.64  |
| 2235 | 155.2283 | -56.0432 | 4.496 |
| 2236 | 155.2639 | 68.74765 | 5.89  |
| 2237 | 155.544  | 41.22953 | 5.74  |
| 2238 | 155.5816 | -41.65   | 4.82  |
| 2239 | 155.5823 | 41.49952 | 3.05  |
| 2240 | 155.7423 | -66.9015 | 4.97  |
| 2241 | 155.7764 | 33.90814 | 5.89  |
| 2242 | 155.8603 | -4.07403 | 5.93  |

|      |          |          |       |
|------|----------|----------|-------|
| 2243 | 155.8721 | -38.0098 | 5.34  |
| 2244 | 156.0327 | 65.56642 | 4.94  |
| 2245 | 156.0358 | 33.71853 | 5.52  |
| 2246 | 156.0988 | -74.0316 | 3.99  |
| 2247 | 156.2476 | -58.5763 | 5.92  |
| 2248 | 156.3133 | 8.784845 | 5.62  |
| 2249 | 156.4345 | -7.05983 | 5.6   |
| 2250 | 156.4784 | 33.79612 | 4.73  |
| 2251 | 156.5226 | -16.8363 | 3.82  |
| 2252 | 156.7038 | -54.8773 | 5.56  |
| 2253 | 156.7879 | -31.0678 | 4.27  |
| 2254 | 156.852  | -57.6388 | 4.68  |
| 2255 | 156.8553 | -65.7047 | 6     |
| 2256 | 156.9697 | -58.7394 | 3.83  |
| 2257 | 156.9708 | 36.70721 | 4.21  |
| 2258 | 157.2191 | -64.1723 | 5.3   |
| 2259 | 157.3696 | -2.73908 | 5.186 |
| 2260 | 157.3707 | -29.6638 | 5.57  |
| 2261 | 157.3974 | -30.6071 | 5.58  |
| 2262 | 157.4228 | 84.25201 | 5.52  |
| 2263 | 157.5269 | 38.92513 | 5.79  |
| 2264 | 157.5728 | -0.63703 | 5.07  |
| 2265 | 157.5839 | -71.9928 | 4.72  |
| 2266 | 157.6566 | 55.98054 | 4.83  |
| 2267 | 157.7493 | -13.5885 | 5.6   |
| 2268 | 157.7586 | -73.2215 | 4.93  |
| 2269 | 157.7694 | 82.55859 | 5.26  |
| 2270 | 157.8409 | -53.7155 | 4.9   |
| 2271 | 157.9641 | 32.37955 | 5.91  |
| 2272 | 157.9893 | -45.0667 | 5.71  |
| 2273 | 158.0061 | -61.6853 | 3.37  |
| 2274 | 158.0491 | 14.13727 | 5.44  |
| 2275 | 158.14   | -44.6185 | 5.91  |
| 2276 | 158.2028 | 9.306586 | 3.85  |
| 2277 | 158.2369 | -47.0034 | 5.03  |
| 2278 | 158.3079 | 40.42556 | 4.73  |
| 2279 | 158.3788 | 34.98869 | 5.58  |
| 2280 | 158.5037 | -23.7452 | 5.07  |
| 2281 | 158.7001 | 6.953749 | 5.08  |
| 2282 | 158.759  | 8.650426 | 5.67  |
| 2283 | 158.7728 | 75.71295 | 4.85  |
| 2284 | 158.7904 | 57.08264 | 5.16  |
| 2285 | 158.8035 | -39.5626 | 5.54  |
| 2286 | 158.8671 | -78.6078 | 4.1   |
| 2287 | 158.8971 | -57.5576 | 4.44  |
| 2288 | 159.0855 | -59.5644 | 5.08  |
| 2289 | 159.1349 | -12.2301 | 5.72  |
| 2290 | 159.3072 | -27.4126 | 4.88  |
| 2291 | 159.3256 | -48.2256 | 3.84  |
| 2292 | 159.3628 | -58.7333 | 5.49  |
| 2293 | 159.3886 | -13.3845 | 4.92  |
| 2294 | 159.511  | -57.2563 | 5.89  |
| 2295 | 159.6456 | -16.8766 | 4.91  |
| 2296 | 159.6801 | 31.97624 | 4.68  |
| 2297 | 159.6875 | -59.183  | 4.74  |
| 2298 | 159.7484 | -58.8169 | 5.99  |
| 2299 | 159.7736 | 53.6683  | 5.54  |
| 2300 | 159.7818 | 37.91    | 5.84  |
| 2301 | 159.8266 | -55.6033 | 4.28  |

|      |          |          |      |
|------|----------|----------|------|
| 2302 | 160.0477 | -65.1002 | 5.51 |
| 2303 | 160.4511 | 68.4435  | 5.74 |
| 2304 | 160.4647 | -79.7833 | 5.98 |
| 2305 | 160.4856 | 65.71628 | 5.11 |
| 2306 | 160.5588 | -64.4664 | 4.76 |
| 2307 | 160.669  | -59.2158 | 5.4  |
| 2308 | 160.6799 | -32.7157 | 5.63 |
| 2309 | 160.7392 | -64.3945 | 2.74 |
| 2310 | 160.7578 | 26.32558 | 5.52 |
| 2311 | 160.7668 | 69.07621 | 4.99 |
| 2312 | 160.854  | 23.1884  | 5.08 |
| 2313 | 160.8845 | -60.5666 | 4.56 |
| 2314 | 160.887  | 46.20388 | 5.19 |
| 2315 | 160.9306 | 57.1992  | 5.79 |
| 2316 | 160.9633 | -64.249  | 5.76 |
| 2317 | 161.0288 | -63.9611 | 4.8  |
| 2318 | 161.2668 | 67.41138 | 5.99 |
| 2319 | 161.318  | -80.4696 | 5.5  |
| 2320 | 161.4458 | -80.5402 | 4.45 |
| 2321 | 161.4662 | 30.68231 | 5.26 |
| 2322 | 161.569  | -64.5146 | 5.34 |
| 2323 | 161.6023 | 18.89152 | 5.5  |
| 2324 | 161.6053 | 14.19464 | 5.48 |
| 2325 | 161.6233 | -64.2632 | 5.23 |
| 2326 | 161.6924 | -49.4203 | 2.72 |
| 2327 | 161.7134 | -64.3835 | 4.85 |
| 2328 | 161.7169 | -17.2969 | 5.43 |
| 2329 | 161.7395 | -56.7572 | 5.14 |
| 2330 | 162.0588 | -31.6879 | 5.88 |
| 2331 | 162.169  | -1.9589  | 5.92 |
| 2332 | 162.3143 | 10.5452  | 5.32 |
| 2333 | 162.3518 | -59.3238 | 5.92 |
| 2334 | 162.4062 | -16.1936 | 3.11 |
| 2335 | 162.4312 | -9.8527  | 5.85 |
| 2336 | 162.4876 | -34.0582 | 5.61 |
| 2337 | 162.5752 | -8.89776 | 5.8  |
| 2338 | 162.7725 | -3.09267 | 5.95 |
| 2339 | 162.7959 | 56.58225 | 5.66 |
| 2340 | 162.8488 | 59.32012 | 5.56 |
| 2341 | 163.1285 | -57.2404 | 5.27 |
| 2342 | 163.3279 | 34.21487 | 3.79 |
| 2343 | 163.373  | -20.1387 | 5.23 |
| 2344 | 163.3736 | -58.8532 | 3.79 |
| 2345 | 163.3779 | 69.85388 | 5.92 |
| 2346 | 163.3935 | 54.58513 | 5.12 |
| 2347 | 163.4253 | -70.7203 | 5.99 |
| 2348 | 163.4321 | -2.12921 | 5.45 |
| 2349 | 163.4948 | 43.18996 | 4.67 |
| 2350 | 163.5741 | -13.758  | 5.66 |
| 2351 | 163.6233 | -61.8266 | 5.95 |
| 2352 | 163.7424 | 34.0348  | 5.73 |
| 2353 | 163.8218 | -60.517  | 5.93 |
| 2354 | 163.9033 | 24.74972 | 4.47 |
| 2355 | 163.9267 | 0.736923 | 5.92 |
| 2356 | 163.9349 | 33.50693 | 5.03 |
| 2357 | 164.0061 | 6.185371 | 5.98 |
| 2358 | 164.1794 | -37.1378 | 4.6  |
| 2359 | 164.2827 | -50.765  | 5.91 |
| 2360 | 164.8073 | -33.7376 | 5.73 |

|      |          |          |      |
|------|----------|----------|------|
| 2361 | 164.8666 | 40.43026 | 5.03 |
| 2362 | 164.8789 | -16.3537 | 5.9  |
| 2363 | 164.8866 | 36.0931  | 6    |
| 2364 | 164.9436 | -18.2988 | 4.08 |
| 2365 | 164.9974 | -43.8071 | 5.81 |
| 2366 | 165.0386 | -42.2259 | 4.38 |
| 2367 | 165.0487 | -14.0834 | 5.85 |
| 2368 | 165.0613 | 45.52628 | 5.45 |
| 2369 | 165.1402 | 3.617494 | 4.85 |
| 2370 | 165.1867 | 6.101449 | 5    |
| 2371 | 165.2101 | 39.21209 | 5.07 |
| 2372 | 165.457  | -2.48458 | 4.72 |
| 2373 | 165.4603 | 56.38243 | 2.35 |
| 2374 | 165.5824 | 20.17984 | 4.41 |
| 2375 | 165.812  | -11.3035 | 5.51 |
| 2376 | 165.9025 | -0.00083 | 5.94 |
| 2377 | 165.932  | 61.75103 | 1.82 |
| 2378 | 166.13   | -47.6791 | 5.68 |
| 2379 | 166.2258 | -35.8047 | 5.43 |
| 2380 | 166.2543 | 7.336007 | 4.62 |
| 2381 | 166.3329 | -27.2936 | 4.93 |
| 2382 | 166.4899 | -27.2879 | 5.71 |
| 2383 | 166.6351 | -62.4241 | 4.61 |
| 2384 | 166.7079 | -70.8779 | 5.58 |
| 2385 | 166.7259 | 1.955526 | 5.53 |
| 2386 | 166.8195 | -42.6387 | 5.17 |
| 2387 | 167.1417 | -61.9472 | 5.15 |
| 2388 | 167.1475 | -58.975  | 3.92 |
| 2389 | 167.1833 | -28.0807 | 5.43 |
| 2390 | 167.2045 | 24.65846 | 5.69 |
| 2391 | 167.3295 | 36.30938 | 5.78 |
| 2392 | 167.4104 | 43.20774 | 5.91 |
| 2393 | 167.4159 | 44.49849 | 3    |
| 2394 | 167.4725 | -32.3675 | 5.78 |
| 2395 | 167.9145 | -22.8258 | 4.46 |
| 2396 | 168.1377 | -49.101  | 5.37 |
| 2397 | 168.1501 | -60.3176 | 4.62 |
| 2398 | 168.1884 | -64.1698 | 5.22 |
| 2399 | 168.3112 | -44.3722 | 5.77 |
| 2400 | 168.3783 | -59.6193 | 5.74 |
| 2401 | 168.4141 | -53.2318 | 5.75 |
| 2402 | 168.4398 | -0.0695  | 5.4  |
| 2403 | 168.5076 | 8.060696 | 5.79 |
| 2404 | 168.5271 | 20.52372 | 2.56 |
| 2405 | 168.56   | 15.42957 | 3.33 |
| 2406 | 168.801  | 23.0955  | 4.57 |
| 2407 | 168.9662 | 13.30758 | 5.31 |
| 2408 | 169.1654 | -3.6516  | 4.47 |
| 2409 | 169.1744 | 49.47625 | 5.88 |
| 2410 | 169.3225 | 2.010556 | 5.17 |
| 2411 | 169.5456 | 31.52924 | 3.79 |
| 2412 | 169.6197 | 33.09431 | 3.49 |
| 2413 | 169.729  | 1.650395 | 5.9  |
| 2414 | 169.7829 | 38.18556 | 4.76 |
| 2415 | 169.8185 | -64.5825 | 5.99 |
| 2416 | 169.8352 | -14.7785 | 3.57 |
| 2417 | 170.2517 | -54.491  | 3.89 |
| 2418 | 170.2841 | 6.029322 | 4.05 |
| 2419 | 170.7066 | 43.4827  | 4.99 |

|      |          |          |      |
|------|----------|----------|------|
| 2420 | 170.7839 | -56.7794 | 5.82 |
| 2421 | 170.8028 | -36.1648 | 5    |
| 2422 | 170.8412 | -18.78   | 5.08 |
| 2423 | 170.9811 | 10.52951 | 3.96 |
| 2424 | 171.0097 | 1.407766 | 5.39 |
| 2425 | 171.0464 | -72.2566 | 5.59 |
| 2426 | 171.1525 | -10.8593 | 4.81 |
| 2427 | 171.2205 | -17.684  | 4.08 |
| 2428 | 171.2455 | 11.43029 | 5.79 |
| 2429 | 171.3727 | -36.0631 | 5.22 |
| 2430 | 171.3879 | -37.7476 | 5.92 |
| 2431 | 171.4016 | 16.45654 | 5.58 |
| 2432 | 171.4298 | -63.9725 | 5.17 |
| 2433 | 171.488  | 55.85046 | 5.74 |
| 2434 | 171.6476 | -61.1152 | 5.29 |
| 2435 | 171.697  | -53.1599 | 5.81 |
| 2436 | 171.7897 | -12.3567 | 5.93 |
| 2437 | 171.9843 | 2.856265 | 4.94 |
| 2438 | 172.1462 | -42.6742 | 5.14 |
| 2439 | 172.2672 | 39.33697 | 5.36 |
| 2440 | 172.269  | 61.77837 | 5.84 |
| 2441 | 172.4109 | -24.464  | 5.82 |
| 2442 | 172.4244 | 15.41327 | 5.73 |
| 2443 | 172.5787 | -3.0035  | 4.76 |
| 2444 | 172.621  | 18.4098  | 5.55 |
| 2445 | 172.6297 | 43.17324 | 5.95 |
| 2446 | 172.8509 | 69.33108 | 3.81 |
| 2447 | 172.942  | -59.4421 | 5.09 |
| 2448 | 172.9533 | -59.5156 | 5.19 |
| 2449 | 173.0833 | -66.9618 | 5.89 |
| 2450 | 173.0864 | 61.08252 | 5.48 |
| 2451 | 173.1981 | -7.82752 | 5.92 |
| 2452 | 173.2003 | -40.4362 | 5.64 |
| 2453 | 173.2255 | -31.0872 | 5.14 |
| 2454 | 173.2505 | -31.8576 | 3.54 |
| 2455 | 173.405  | -40.5866 | 5.41 |
| 2456 | 173.5915 | 3.060166 | 5.76 |
| 2457 | 173.6229 | -32.8313 | 5.96 |
| 2458 | 173.677  | 16.79692 | 5.95 |
| 2459 | 173.6902 | -54.2641 | 4.62 |
| 2460 | 173.7369 | -49.1365 | 5.5  |
| 2461 | 173.7704 | 54.78542 | 5.63 |
| 2462 | 173.8053 | -47.3726 | 5.69 |
| 2463 | 173.9454 | -63.0198 | 3.12 |
| 2464 | 173.9816 | -47.6416 | 5.26 |
| 2465 | 174.0117 | 69.32295 | 5.2  |
| 2466 | 174.0748 | 27.78135 | 5.82 |
| 2467 | 174.0932 | -61.0524 | 5.84 |
| 2468 | 174.1456 | -33.5701 | 5.71 |
| 2469 | 174.1705 | -9.80225 | 4.69 |
| 2470 | 174.2372 | -0.82375 | 4.3  |
| 2471 | 174.2522 | -61.2834 | 5.13 |
| 2472 | 174.3151 | -75.8965 | 5.65 |
| 2473 | 174.3916 | -47.7473 | 5.46 |
| 2474 | 174.4516 | -67.6204 | 5.94 |
| 2475 | 174.5304 | -61.8266 | 5.14 |
| 2476 | 174.5857 | 43.62543 | 5.57 |
| 2477 | 174.615  | 8.134299 | 5.32 |
| 2478 | 174.6667 | -13.2019 | 5.49 |

|      |          |          |      |
|------|----------|----------|------|
| 2479 | 174.8733 | -65.3978 | 5.09 |
| 2480 | 175.0533 | -34.7447 | 4.7  |
| 2481 | 175.177  | -53.9686 | 5.96 |
| 2482 | 175.1961 | 21.35273 | 5.26 |
| 2483 | 175.2235 | -62.0901 | 4.94 |
| 2484 | 175.2626 | 34.20164 | 5.31 |
| 2485 | 175.3325 | -43.0957 | 5.53 |
| 2486 | 175.3927 | 31.74606 | 5.75 |
| 2487 | 175.4331 | -32.4994 | 5.21 |
| 2488 | 175.6182 | 66.74491 | 5.31 |
| 2489 | 175.8633 | -37.1902 | 5.98 |
| 2490 | 175.88   | -62.4894 | 5.01 |
| 2491 | 176.1907 | -18.3507 | 4.71 |
| 2492 | 176.321  | 8.258119 | 4.84 |
| 2493 | 176.4017 | -66.7288 | 3.63 |
| 2494 | 176.4332 | -45.6901 | 5.28 |
| 2495 | 176.4648 | 6.529376 | 4.03 |
| 2496 | 176.5126 | 47.77941 | 3.7  |
| 2497 | 176.6284 | -61.1784 | 4.11 |
| 2498 | 176.6295 | -40.5004 | 4.89 |
| 2499 | 176.7318 | 55.62819 | 5.25 |
| 2500 | 176.8298 | -57.6965 | 5.42 |
| 2501 | 176.9788 | 8.245895 | 5.32 |
| 2502 | 176.9964 | 20.21893 | 4.53 |
| 2503 | 177.0606 | -66.8149 | 4.74 |
| 2504 | 177.1613 | 14.28421 | 5.9  |
| 2505 | 177.1878 | -26.7498 | 5.11 |
| 2506 | 177.2649 | 14.57206 | 2.13 |
| 2507 | 177.4211 | -63.7885 | 4.32 |
| 2508 | 177.4238 | 34.93176 | 5.73 |
| 2509 | 177.4859 | -70.2258 | 4.97 |
| 2510 | 177.6137 | -62.6494 | 5.7  |
| 2511 | 177.6738 | 1.764718 | 3.6  |
| 2512 | 177.7593 | -5.33333 | 5.63 |
| 2513 | 177.7862 | -45.1735 | 4.46 |
| 2514 | 177.9234 | -30.8348 | 5.86 |
| 2515 | 177.9634 | -65.2059 | 4.94 |
| 2516 | 178.0428 | -56.9877 | 5.56 |
| 2517 | 178.2272 | -33.9081 | 4.29 |
| 2518 | 178.4577 | 53.69476 | 2.43 |
| 2519 | 178.6772 | -25.7139 | 5.28 |
| 2520 | 178.75   | -63.2792 | 5.92 |
| 2521 | 178.7631 | 8.443943 | 5.58 |
| 2522 | 178.9172 | -28.4771 | 5.91 |
| 2523 | 178.9189 | 15.64682 | 5.53 |
| 2524 | 178.9934 | 56.59856 | 5.83 |
| 2525 | 179.004  | -17.1508 | 5.17 |
| 2526 | 179.4167 | -62.4487 | 5.56 |
| 2527 | 179.5634 | -56.3173 | 5.44 |
| 2528 | 179.6986 | -64.3396 | 5.62 |
| 2529 | 179.8231 | 33.167   | 5.95 |
| 2530 | 179.9066 | -78.2218 | 4.91 |
| 2531 | 179.9871 | 3.655197 | 5.36 |
| 2532 | 180.1852 | -10.446  | 5.54 |
| 2533 | 180.2132 | -19.659  | 5.28 |
| 2534 | 180.2183 | 6.614323 | 4.66 |
| 2535 | 180.4145 | 36.04209 | 5.59 |
| 2536 | 180.5283 | 43.0456  | 5.21 |
| 2537 | 180.6571 | -69.1923 | 5.89 |

|      |          |          |      |
|------|----------|----------|------|
| 2538 | 180.7563 | -63.3129 | 4.33 |
| 2539 | 180.9149 | -42.4341 | 5.16 |
| 2540 | 181.0692 | 21.45915 | 5.89 |
| 2541 | 181.0801 | -63.1657 | 4.73 |
| 2542 | 181.162  | -68.3289 | 5.36 |
| 2543 | 181.1936 | -76.5191 | 5.03 |
| 2544 | 181.2384 | -60.9683 | 5.98 |
| 2545 | 181.3022 | 8.732986 | 4.12 |
| 2546 | 181.313  | 76.90573 | 5.79 |
| 2547 | 181.7204 | -64.6137 | 4.14 |
| 2548 | 181.9578 | -75.367  | 5.16 |
| 2549 | 182.0218 | -50.6613 | 4.46 |
| 2550 | 182.0613 | -48.6925 | 5.34 |
| 2551 | 182.0896 | -50.7224 | 2.58 |
| 2552 | 182.1034 | -24.7289 | 4.04 |
| 2553 | 182.2242 | -44.326  | 5.74 |
| 2554 | 182.2275 | -41.2316 | 5.52 |
| 2555 | 182.4221 | 1.897889 | 5.96 |
| 2556 | 182.5142 | 5.807008 | 5.71 |
| 2557 | 182.5312 | -22.6198 | 3.01 |
| 2558 | 182.6921 | 27.28151 | 6    |
| 2559 | 182.7499 | 81.70983 | 5.96 |
| 2560 | 182.766  | -23.6024 | 5.46 |
| 2561 | 182.913  | -52.3685 | 3.96 |
| 2562 | 182.9632 | 25.87028 | 5.65 |
| 2563 | 183.0387 | 20.54206 | 5.6  |
| 2564 | 183.0498 | 77.61624 | 5.15 |
| 2565 | 183.0916 | -62.9508 | 5.95 |
| 2566 | 183.3543 | -38.9292 | 5.77 |
| 2567 | 183.3581 | 10.26234 | 5.85 |
| 2568 | 183.5112 | -45.7239 | 5.31 |
| 2569 | 183.7483 | -20.8442 | 5.81 |
| 2570 | 183.7854 | 70.20001 | 5.73 |
| 2571 | 183.7863 | -58.7489 | 2.79 |
| 2572 | 183.8565 | 57.03262 | 3.3  |
| 2573 | 183.9515 | -17.5419 | 2.59 |
| 2574 | 184.0008 | 14.89907 | 5.1  |
| 2575 | 184.0315 | 40.66018 | 5.67 |
| 2576 | 184.0856 | 23.94541 | 4.93 |
| 2577 | 184.1256 | 33.06153 | 4.99 |
| 2578 | 184.3733 | 53.19133 | 5.8  |
| 2579 | 184.3774 | 28.93719 | 5.71 |
| 2580 | 184.3928 | -67.9607 | 4.06 |
| 2581 | 184.5868 | -79.3122 | 4.25 |
| 2582 | 184.6094 | -64.0031 | 4.05 |
| 2583 | 184.668  | -0.78718 | 5.91 |
| 2584 | 184.7083 | 75.16056 | 5.47 |
| 2585 | 184.749  | -55.143  | 5.01 |
| 2586 | 184.953  | 48.98415 | 5.29 |
| 2587 | 184.9765 | -0.6668  | 3.89 |
| 2588 | 185.0449 | -22.1757 | 5.95 |
| 2589 | 185.082  | 26.61948 | 5.52 |
| 2590 | 185.0874 | 3.312574 | 4.97 |
| 2591 | 185.1402 | -22.2159 | 5.21 |
| 2592 | 185.1793 | 17.79287 | 4.73 |
| 2593 | 185.212  | 57.86412 | 5.52 |
| 2594 | 185.2321 | -13.5657 | 5.15 |
| 2595 | 185.34   | -60.4011 | 3.59 |
| 2596 | 185.4893 | -56.3744 | 5.89 |

|      |          |          |      |
|------|----------|----------|------|
| 2597 | 185.5306 | -67.5221 | 5.16 |
| 2598 | 185.5501 | -68.3073 | 5.74 |
| 2599 | 185.6263 | 25.84616 | 4.8  |
| 2600 | 185.706  | -57.6761 | 5.38 |
| 2601 | 185.8399 | -24.8407 | 5.66 |
| 2602 | 185.8976 | -35.4127 | 5.32 |
| 2603 | 185.9364 | -38.9114 | 5.79 |
| 2604 | 186.0062 | 51.56226 | 4.76 |
| 2605 | 186.0772 | 26.09861 | 5.15 |
| 2606 | 186.2634 | 56.77783 | 5.84 |
| 2607 | 186.299  | -11.6106 | 5.95 |
| 2608 | 186.3406 | -35.1864 | 5.71 |
| 2609 | 186.4622 | 39.01862 | 5.02 |
| 2610 | 186.6003 | 27.26824 | 4.92 |
| 2611 | 186.6323 | -51.4506 | 4.82 |
| 2612 | 186.6518 | -63.0995 | 1.58 |
| 2613 | 186.7154 | -32.8301 | 5.57 |
| 2614 | 186.7345 | 28.26842 | 4.34 |
| 2615 | 186.7471 | 26.8257  | 4.96 |
| 2616 | 186.8702 | -58.9918 | 5.48 |
| 2617 | 186.8963 | 55.71272 | 5.69 |
| 2618 | 187.0099 | -50.2306 | 3.91 |
| 2619 | 187.0936 | -39.0412 | 5.46 |
| 2620 | 187.2279 | 25.91285 | 5.25 |
| 2621 | 187.3627 | 24.10893 | 5.48 |
| 2622 | 187.4302 | 20.89611 | 5.68 |
| 2623 | 187.4661 | -16.5154 | 2.97 |
| 2624 | 187.4758 | -56.5249 | 5.79 |
| 2625 | 187.4889 | 58.40574 | 5.36 |
| 2626 | 187.5277 | 69.20112 | 5.03 |
| 2627 | 187.5727 | -23.6964 | 5.63 |
| 2628 | 187.7523 | 24.56717 | 5.44 |
| 2629 | 187.7915 | -57.1132 | 1.65 |
| 2630 | 187.918  | -59.4239 | 5.5  |
| 2631 | 187.9838 | -63.5058 | 5.96 |
| 2632 | 188.0176 | -16.196  | 4.31 |
| 2633 | 188.0416 | -73.0011 | 5.88 |
| 2634 | 188.1167 | -72.133  | 3.84 |
| 2635 | 188.15   | -13.8591 | 5.74 |
| 2636 | 188.3706 | 69.78824 | 3.89 |
| 2637 | 188.3927 | -12.8302 | 5.59 |
| 2638 | 188.4122 | 33.24758 | 5.42 |
| 2639 | 188.4356 | 41.35748 | 4.25 |
| 2640 | 188.4448 | -9.45208 | 5.5  |
| 2641 | 188.5968 | -23.3968 | 2.66 |
| 2642 | 188.6766 | -44.673  | 5.77 |
| 2643 | 188.6834 | 70.02177 | 4.95 |
| 2644 | 188.7128 | 22.62926 | 4.79 |
| 2645 | 188.7823 | 18.37706 | 4.99 |
| 2646 | 188.784  | 21.88138 | 5.86 |
| 2647 | 188.9397 | -41.0219 | 5.12 |
| 2648 | 189.0043 | -39.8695 | 5.79 |
| 2649 | 189.1973 | -5.8319  | 5.88 |
| 2650 | 189.2431 | 17.08954 | 5.68 |
| 2651 | 189.2959 | -69.1356 | 2.69 |
| 2652 | 189.4257 | -48.5413 | 3.85 |
| 2653 | 189.4262 | -27.1389 | 5.41 |
| 2654 | 189.5934 | 1.854662 | 5.71 |
| 2655 | 189.6859 | -18.2501 | 6    |

|      |          |          |      |
|------|----------|----------|------|
| 2656 | 189.7644 | -30.4224 | 5.86 |
| 2657 | 189.7805 | 21.06256 | 5.48 |
| 2658 | 189.8115 | -7.99556 | 4.65 |
| 2659 | 189.9689 | -39.9873 | 4.64 |
| 2660 | 190.3458 | -46.1456 | 5.83 |
| 2661 | 190.3793 | -48.9599 | 2.18 |
| 2662 | 190.4711 | 10.23563 | 4.87 |
| 2663 | 190.4857 | -59.6858 | 4.92 |
| 2664 | 190.488  | 6.806617 | 5.58 |
| 2665 | 190.6477 | -48.8131 | 4.66 |
| 2666 | 190.7094 | -63.0586 | 5.31 |
| 2667 | 190.7882 | -56.1762 | 5.99 |
| 2668 | 190.9085 | -1.577   | 5.92 |
| 2669 | 191.0022 | -28.324  | 5.45 |
| 2670 | 191.2475 | 39.27892 | 5.96 |
| 2671 | 191.2826 | 45.44026 | 5.27 |
| 2672 | 191.4044 | 7.673326 | 5.21 |
| 2673 | 191.4085 | -60.9813 | 4.69 |
| 2674 | 191.57   | -68.1081 | 3.08 |
| 2675 | 191.5939 | 9.539684 | 5.66 |
| 2676 | 191.5946 | -56.4888 | 4.62 |
| 2677 | 191.6615 | 16.57769 | 5.11 |
| 2678 | 191.6926 | -33.3155 | 5.87 |
| 2679 | 191.829  | 62.78115 | 5.89 |
| 2680 | 191.8931 | 66.7903  | 5.43 |
| 2681 | 191.9303 | -59.6888 | 1.31 |
| 2682 | 192.1094 | -27.5974 | 5.66 |
| 2683 | 192.1644 | 60.31982 | 5.84 |
| 2684 | 192.2259 | 14.12258 | 5.71 |
| 2685 | 192.3227 | 27.55238 | 5.76 |
| 2686 | 192.4374 | -71.9863 | 5.55 |
| 2687 | 192.5448 | 37.51694 | 5.88 |
| 2688 | 192.6715 | -33.9993 | 4.91 |
| 2689 | 192.7412 | -52.7874 | 5.71 |
| 2690 | 192.8249 | -60.3298 | 5.75 |
| 2691 | 192.9247 | 27.54071 | 4.93 |
| 2692 | 192.9872 | -39.6804 | 5.98 |
| 2693 | 193.2674 | -54.9525 | 5.91 |
| 2694 | 193.2788 | -48.9433 | 4.32 |
| 2695 | 193.3239 | 21.24494 | 4.92 |
| 2696 | 193.3412 | -60.3285 | 5.76 |
| 2697 | 193.3592 | -40.1789 | 4.27 |
| 2698 | 193.4538 | -60.3762 | 5.9  |
| 2699 | 193.5073 | 55.95982 | 1.76 |
| 2700 | 193.5777 | -11.6486 | 6    |
| 2701 | 193.5882 | -9.53899 | 4.79 |
| 2702 | 193.6633 | -59.1467 | 4.61 |
| 2703 | 193.7355 | 47.19672 | 5.85 |
| 2704 | 193.7438 | -44.152  | 5.89 |
| 2705 | 193.745  | -85.1234 | 5.46 |
| 2706 | 193.831  | -42.9157 | 5.46 |
| 2707 | 193.869  | 65.43847 | 5.23 |
| 2708 | 193.9009 | 3.39747  | 3.42 |
| 2709 | 193.9881 | -56.8358 | 5.38 |
| 2710 | 194.0732 | 54.09949 | 5.84 |
| 2711 | 194.132  | -72.1852 | 5.93 |
| 2712 | 194.2681 | -51.1988 | 5.17 |
| 2713 | 194.6972 | 75.47251 | 6    |
| 2714 | 194.731  | 17.40945 | 4.75 |

|      |          |          |      |
|------|----------|----------|------|
| 2715 | 194.9147 | -3.81193 | 5.8  |
| 2716 | 194.9795 | 66.59727 | 5.37 |
| 2717 | 195.0686 | 30.78502 | 4.89 |
| 2718 | 195.1498 | -3.36849 | 5.99 |
| 2719 | 195.1821 | 56.36634 | 4.94 |
| 2720 | 195.2901 | 17.12315 | 5.97 |
| 2721 | 195.5442 | 10.95915 | 2.84 |
| 2722 | 195.5678 | -71.5489 | 3.61 |
| 2723 | 195.7722 | -71.4757 | 5.96 |
| 2724 | 195.8888 | -49.5273 | 4.83 |
| 2725 | 195.9421 | -20.5835 | 5.6  |
| 2726 | 196.4352 | 35.7989  | 5.2  |
| 2727 | 196.4678 | 45.26855 | 5.64 |
| 2728 | 196.5696 | -48.4633 | 4.71 |
| 2729 | 196.5942 | 22.61619 | 5.64 |
| 2730 | 196.6462 | -41.5884 | 5.6  |
| 2731 | 196.7261 | -35.862  | 5.63 |
| 2732 | 196.7277 | -49.9062 | 4.28 |
| 2733 | 196.7947 | 27.62474 | 4.78 |
| 2734 | 196.9095 | -53.4598 | 5.71 |
| 2735 | 196.9742 | -10.7404 | 5.16 |
| 2736 | 197.0298 | -65.306  | 5.66 |
| 2737 | 197.1353 | -8.98439 | 5.57 |
| 2738 | 197.2636 | -23.1181 | 4.94 |
| 2739 | 197.3018 | 10.02247 | 5.79 |
| 2740 | 197.4387 | -10.3293 | 5.96 |
| 2741 | 197.4494 | 16.84861 | 5.91 |
| 2742 | 197.4875 | -5.53901 | 4.39 |
| 2743 | 197.497  | 17.52943 | 4.32 |
| 2744 | 197.5134 | 38.49898 | 5.93 |
| 2745 | 197.787  | -42.2329 | 5.79 |
| 2746 | 197.8467 | -43.3686 | 5.24 |
| 2747 | 197.9643 | -69.942  | 5.91 |
| 2748 | 197.9683 | 27.87818 | 4.25 |
| 2749 | 198.0133 | -37.803  | 4.85 |
| 2750 | 198.0148 | -16.1986 | 5.04 |
| 2751 | 198.0733 | -59.9206 | 4.59 |
| 2752 | 198.1372 | 11.5561  | 5.76 |
| 2753 | 198.2033 | -66.2267 | 5.91 |
| 2754 | 198.3473 | -50.6998 | 5.91 |
| 2755 | 198.4289 | 40.15289 | 4.93 |
| 2756 | 198.5454 | -19.9309 | 5.32 |
| 2757 | 198.5504 | -58.6839 | 5.9  |
| 2758 | 198.5631 | -59.1032 | 4.91 |
| 2759 | 198.5722 | -78.4475 | 5.85 |
| 2760 | 198.6303 | 11.33166 | 5.64 |
| 2761 | 198.6803 | -48.957  | 5.84 |
| 2762 | 198.8123 | -67.8946 | 4.78 |
| 2763 | 198.8831 | 40.8552  | 5.78 |
| 2764 | 198.9949 | -19.9431 | 5.22 |
| 2765 | 199.1938 | 9.424156 | 5.2  |
| 2766 | 199.2214 | -31.5062 | 5.12 |
| 2767 | 199.3042 | -66.7834 | 4.85 |
| 2768 | 199.308  | -43.9795 | 5.82 |
| 2769 | 199.3151 | 13.67575 | 5.31 |
| 2770 | 199.3856 | 40.57261 | 4.71 |
| 2771 | 199.4012 | 5.469869 | 4.79 |
| 2772 | 199.5605 | 49.68206 | 5.15 |
| 2773 | 199.6013 | -18.3112 | 4.74 |

|      |          |          |      |
|------|----------|----------|------|
| 2774 | 199.6155 | 34.0983  | 5.79 |
| 2775 | 199.7304 | -23.1715 | 3    |
| 2776 | 200.079  | 40.15055 | 5.6  |
| 2777 | 200.1492 | -36.7123 | 2.76 |
| 2778 | 200.1576 | -52.7478 | 5.46 |
| 2779 | 200.2404 | -46.88   | 5.76 |
| 2780 | 200.4235 | 2.087243 | 5.69 |
| 2781 | 200.5404 | 5.154764 | 5.88 |
| 2782 | 200.5679 | -52.183  | 5.85 |
| 2783 | 200.6581 | -60.9884 | 4.53 |
| 2784 | 200.7546 | -17.7353 | 5.36 |
| 2785 | 200.8287 | -4.92443 | 5.86 |
| 2786 | 201.002  | -64.5357 | 4.53 |
| 2787 | 201.1385 | -5.16401 | 5.77 |
| 2788 | 201.2778 | 23.85442 | 5.76 |
| 2789 | 201.2797 | -74.8878 | 5.04 |
| 2790 | 201.2982 | -11.1613 | 1.06 |
| 2791 | 201.3064 | 54.98796 | 4    |
| 2792 | 201.308  | -64.4851 | 5.32 |
| 2793 | 201.4596 | -70.6272 | 5.66 |
| 2794 | 201.5324 | -39.7551 | 5.11 |
| 2795 | 201.5336 | 72.39148 | 5.81 |
| 2796 | 201.5476 | -1.19247 | 5.97 |
| 2797 | 201.5692 | 46.02806 | 5.88 |
| 2798 | 201.6799 | -12.7077 | 5.26 |
| 2799 | 201.7338 | -41.4976 | 5.66 |
| 2800 | 201.7367 | 78.64387 | 5.75 |
| 2801 | 201.8632 | -15.9736 | 4.75 |
| 2802 | 202.1075 | 13.77879 | 4.97 |
| 2803 | 202.1129 | 59.94579 | 5.46 |
| 2804 | 202.3042 | 10.81831 | 5.65 |
| 2805 | 202.3552 | -51.1651 | 5.05 |
| 2806 | 202.761  | -39.4073 | 3.9  |
| 2807 | 202.9912 | -6.25582 | 4.7  |
| 2808 | 203.1496 | -28.6928 | 5.7  |
| 2809 | 203.2152 | -15.363  | 5.53 |
| 2810 | 203.242  | -10.165  | 5.21 |
| 2811 | 203.5304 | 55.34843 | 5.6  |
| 2812 | 203.533  | 3.658967 | 4.92 |
| 2813 | 203.6136 | 49.01597 | 4.67 |
| 2814 | 203.6685 | -13.2143 | 5.93 |
| 2815 | 203.6733 | -0.59582 | 3.38 |
| 2816 | 203.6992 | 37.18242 | 4.94 |
| 2817 | 203.8804 | -5.39619 | 5.71 |
| 2818 | 204.2019 | -26.4952 | 5.72 |
| 2819 | 204.2462 | 24.6133  | 5.73 |
| 2820 | 204.275  | -44.1432 | 5.96 |
| 2821 | 204.2958 | 71.24225 | 5.5  |
| 2822 | 204.3016 | -61.6919 | 5.63 |
| 2823 | 204.3478 | -46.4279 | 5.9  |
| 2824 | 204.3651 | 36.2949  | 4.91 |
| 2825 | 204.6753 | -29.5609 | 5.82 |
| 2826 | 204.704  | -57.6227 | 6    |
| 2827 | 204.8769 | 52.92121 | 5.47 |
| 2828 | 204.8943 | 10.74623 | 5.58 |
| 2829 | 204.9523 | -40.0517 | 5.6  |
| 2830 | 204.9719 | -53.4664 | 2.28 |
| 2831 | 204.9992 | -49.95   | 5.85 |
| 2832 | 205.0446 | -64.5766 | 5.79 |

|      |          |          |      |
|------|----------|----------|------|
| 2833 | 205.1686 | 19.95572 | 5.76 |
| 2834 | 205.1845 | 54.68163 | 4.63 |
| 2835 | 205.2312 | -85.786  | 5.56 |
| 2836 | 205.2598 | 22.49577 | 5.63 |
| 2837 | 205.3746 | 64.82241 | 5.84 |
| 2838 | 205.4032 | -8.70298 | 5.03 |
| 2839 | 205.4365 | -54.5594 | 5.23 |
| 2840 | 205.5045 | -58.7871 | 5.39 |
| 2841 | 205.5962 | 82.75241 | 5.92 |
| 2842 | 205.6633 | 78.06444 | 5.91 |
| 2843 | 205.681  | 34.98902 | 5.98 |
| 2844 | 205.7293 | -41.401  | 5.96 |
| 2845 | 205.7655 | 3.537903 | 5.35 |
| 2846 | 205.917  | -42.0675 | 5.97 |
| 2847 | 206.1243 | -16.1791 | 5.57 |
| 2848 | 206.4037 | -26.116  | 5.81 |
| 2849 | 206.4219 | -33.0437 | 4.23 |
| 2850 | 206.4847 | -12.4265 | 5.5  |
| 2851 | 206.5564 | 41.08875 | 5.89 |
| 2852 | 206.5794 | 38.50363 | 5.92 |
| 2853 | 206.6486 | 54.43268 | 5.69 |
| 2854 | 206.6641 | -51.4328 | 4.64 |
| 2855 | 206.6805 | 25.70224 | 5.97 |
| 2856 | 206.7348 | -36.2519 | 5.16 |
| 2857 | 206.7491 | 38.5427  | 5.5  |
| 2858 | 206.8156 | 17.45691 | 4.49 |
| 2859 | 206.8558 | -17.8598 | 5.42 |
| 2860 | 206.8652 | -50.2493 | 5.93 |
| 2861 | 206.8852 | 49.31327 | 1.86 |
| 2862 | 206.9106 | -50.3207 | 5.46 |
| 2863 | 207.1614 | 31.19021 | 5.61 |
| 2864 | 207.3613 | -34.4508 | 4.29 |
| 2865 | 207.3693 | 15.79791 | 4.04 |
| 2866 | 207.3762 | -41.6877 | 3.4  |
| 2867 | 207.4041 | -42.4737 | 3.47 |
| 2868 | 207.4285 | 21.26411 | 4.91 |
| 2869 | 207.4396 | 61.48931 | 5.97 |
| 2870 | 207.4678 | -18.1342 | 4.96 |
| 2871 | 207.6028 | 5.497224 | 6    |
| 2872 | 207.7884 | 34.6644  | 5.9  |
| 2873 | 207.8581 | 64.72327 | 4.61 |
| 2874 | 207.9467 | -46.8987 | 5.76 |
| 2875 | 207.9476 | -69.4013 | 5.75 |
| 2876 | 207.9478 | 34.44424 | 4.75 |
| 2877 | 208.0203 | -52.8115 | 5.26 |
| 2878 | 208.2928 | 28.64813 | 5.91 |
| 2879 | 208.3022 | -31.9276 | 4.74 |
| 2880 | 208.3039 | 17.93287 | 5.71 |
| 2881 | 208.3865 | -35.6642 | 5.56 |
| 2882 | 208.4296 | -53.3733 | 5.89 |
| 2883 | 208.4626 | 53.72868 | 5.7  |
| 2884 | 208.4885 | -47.1282 | 5.84 |
| 2885 | 208.6712 | 18.39772 | 2.68 |
| 2886 | 208.6756 | -1.50312 | 5.16 |
| 2887 | 208.7046 | -67.6521 | 5.71 |
| 2888 | 208.8006 | -52.1608 | 5.66 |
| 2889 | 208.8849 | -47.2884 | 2.53 |
| 2890 | 208.912  | -82.6662 | 5.95 |
| 2891 | 209.0824 | -46.5929 | 5.82 |

|      |          |          |      |
|------|----------|----------|------|
| 2892 | 209.1162 | 1.050581 | 5.9  |
| 2893 | 209.1424 | 27.49208 | 5.01 |
| 2894 | 209.412  | -63.6867 | 4.71 |
| 2895 | 209.5678 | -42.1008 | 3.82 |
| 2896 | 209.6298 | -24.9722 | 5.21 |
| 2897 | 209.6622 | 21.69622 | 5.76 |
| 2898 | 209.6663 | 14.64927 | 6    |
| 2899 | 209.6698 | -44.8036 | 3.86 |
| 2900 | 209.8228 | -50.3696 | 5.92 |
| 2901 | 210.0005 | -25.0104 | 5.77 |
| 2902 | 210.2185 | -66.2689 | 5.96 |
| 2903 | 210.3351 | 8.894906 | 5.98 |
| 2904 | 210.4116 | 1.544532 | 4.24 |
| 2905 | 210.4312 | -45.6034 | 4.34 |
| 2906 | 210.5949 | -27.4298 | 5.47 |
| 2907 | 210.8604 | -56.2134 | 5.93 |
| 2908 | 210.9559 | -60.373  | 0.64 |
| 2909 | 211.0973 | 64.37585 | 3.65 |
| 2910 | 211.3328 | -76.7968 | 5.69 |
| 2911 | 211.5115 | -41.1796 | 4.36 |
| 2912 | 211.5929 | -26.6824 | 3.26 |
| 2913 | 211.6706 | -36.37   | 2.08 |
| 2914 | 211.6784 | -9.31352 | 5.46 |
| 2915 | 211.9823 | 43.85445 | 5.21 |
| 2916 | 212.0721 | 49.45817 | 5.26 |
| 2917 | 212.2122 | 77.54751 | 4.8  |
| 2918 | 212.396  | -51.5047 | 5.96 |
| 2919 | 212.4784 | -53.4389 | 4.74 |
| 2920 | 212.5997 | 25.09168 | 4.82 |
| 2921 | 212.7104 | -16.302  | 4.94 |
| 2922 | 213.0167 | 69.43255 | 5.19 |
| 2923 | 213.0659 | 2.409433 | 4.99 |
| 2924 | 213.1918 | -27.2612 | 5.08 |
| 2925 | 213.2239 | -10.2737 | 4.18 |
| 2926 | 213.3184 | -53.6657 | 5.58 |
| 2927 | 213.3709 | 51.78997 | 4.52 |
| 2928 | 213.42   | -0.84546 | 5.9  |
| 2929 | 213.5216 | 12.95944 | 5.53 |
| 2930 | 213.6778 | -41.8375 | 5.61 |
| 2931 | 213.7119 | 10.10061 | 5.29 |
| 2932 | 213.7381 | -57.0861 | 5.05 |
| 2933 | 213.8504 | -18.2007 | 5.53 |
| 2934 | 213.9153 | 19.18241 | 0.16 |
| 2935 | 214.0036 | -6.00055 | 4.08 |
| 2936 | 214.0173 | 18.91179 | 5.97 |
| 2937 | 214.0414 | 51.36723 | 4.75 |
| 2938 | 214.0959 | 46.08831 | 4.18 |
| 2939 | 214.1613 | -66.5879 | 5.76 |
| 2940 | 214.3685 | 15.26338 | 5.85 |
| 2941 | 214.4992 | 35.50951 | 4.81 |
| 2942 | 214.5579 | -81.0078 | 4.9  |
| 2943 | 214.6594 | -18.716  | 5.86 |
| 2944 | 214.7537 | -25.8154 | 5.88 |
| 2945 | 214.7775 | -13.3711 | 4.52 |
| 2946 | 214.8178 | 13.0043  | 5.4  |
| 2947 | 214.8495 | -37.0029 | 5.93 |
| 2948 | 214.8509 | -46.0581 | 3.55 |
| 2949 | 214.8853 | -2.26552 | 5.15 |
| 2950 | 214.9385 | 16.30695 | 4.84 |

|      |          |          |      |
|------|----------|----------|------|
| 2951 | 214.9646 | -61.273  | 5.22 |
| 2952 | 215.0404 | -43.0588 | 5.55 |
| 2953 | 215.0814 | -56.3865 | 4.35 |
| 2954 | 215.1393 | -37.8853 | 4.05 |
| 2955 | 215.1774 | -45.1871 | 4.78 |
| 2956 | 215.5822 | -34.7868 | 5.57 |
| 2957 | 215.5965 | -80.1089 | 5.06 |
| 2958 | 215.6545 | -58.4591 | 4.92 |
| 2959 | 215.7593 | -39.5118 | 4.42 |
| 2960 | 215.7741 | -27.754  | 4.79 |
| 2961 | 215.8446 | 8.446617 | 5.03 |
| 2962 | 215.9524 | -53.1762 | 5.99 |
| 2963 | 216.0037 | 8.243969 | 5.94 |
| 2964 | 216.0473 | 5.820131 | 5.1  |
| 2965 | 216.2026 | -24.8063 | 5.34 |
| 2966 | 216.2764 | -68.1953 | 5.6  |
| 2967 | 216.2992 | 51.85074 | 4.05 |
| 2968 | 216.5343 | -45.2214 | 4.56 |
| 2969 | 216.5451 | -45.3793 | 4.35 |
| 2970 | 216.614  | 19.2269  | 5.4  |
| 2971 | 216.7301 | -83.6679 | 4.31 |
| 2972 | 216.7795 | -65.8216 | 5.84 |
| 2973 | 216.8007 | -46.1343 | 5.82 |
| 2974 | 216.8814 | 75.69599 | 4.24 |
| 2975 | 217.0434 | -29.4916 | 4.98 |
| 2976 | 217.0506 | -2.22796 | 4.84 |
| 2977 | 217.1576 | 49.84485 | 5.58 |
| 2978 | 217.1738 | -6.90054 | 5.42 |
| 2979 | 217.4605 | 0.828929 | 5.97 |
| 2980 | 217.536  | -45.3214 | 5.51 |
| 2981 | 217.5873 | -49.519  | 5.39 |
| 2982 | 217.7952 | -38.8697 | 5.99 |
| 2983 | 217.8185 | -67.7172 | 5.85 |
| 2984 | 217.9575 | 30.37144 | 3.57 |
| 2985 | 218.0195 | 38.30825 | 3.04 |
| 2986 | 218.1289 | 55.39801 | 5.72 |
| 2987 | 218.1356 | 22.26006 | 5.9  |
| 2988 | 218.1544 | -50.4572 | 4.43 |
| 2989 | 218.3749 | -52.6795 | 5.87 |
| 2990 | 218.3849 | -54.9986 | 5.86 |
| 2991 | 218.6604 | 36.62606 | 6    |
| 2992 | 218.6651 | 49.36835 | 5.74 |
| 2993 | 218.6701 | 29.74513 | 4.47 |
| 2994 | 218.8768 | -42.1578 | 2.34 |
| 2995 | 218.8812 | -41.5174 | 5.88 |
| 2996 | 219.0793 | -46.2455 | 5.53 |
| 2997 | 219.1839 | -40.2116 | 5.74 |
| 2998 | 219.334  | -46.1334 | 5.43 |
| 2999 | 219.4718 | -49.4258 | 4.05 |
| 3000 | 219.5525 | 43.64213 | 5.72 |
| 3001 | 219.5583 | 18.29838 | 5.91 |
| 3002 | 219.5634 | 54.02334 | 5.82 |
| 3003 | 219.7093 | 44.4045  | 5.4  |
| 3004 | 220.1766 | 13.53433 | 5.94 |
| 3005 | 220.2558 | -36.1349 | 5.67 |
| 3006 | 220.4115 | 8.161764 | 4.86 |
| 3007 | 220.4313 | 11.66066 | 5.55 |
| 3008 | 220.4823 | -47.3882 | 2.29 |
| 3009 | 220.49   | -37.7935 | 4    |

|      |          |          |      |
|------|----------|----------|------|
| 3010 | 220.6267 | -64.9751 | 3.18 |
| 3011 | 220.7651 | -5.65821 | 3.87 |
| 3012 | 220.8065 | -24.9978 | 5.7  |
| 3013 | 220.8557 | 26.52785 | 4.81 |
| 3014 | 220.9143 | -35.1737 | 4.05 |
| 3015 | 220.9351 | 40.45925 | 5.71 |
| 3016 | 221.2467 | -35.1918 | 4.93 |
| 3017 | 221.3103 | 16.96428 | 4.6  |
| 3018 | 221.3222 | -62.8756 | 5.36 |
| 3019 | 221.3759 | 0.717271 | 5.68 |
| 3020 | 221.5003 | -25.4432 | 5.08 |
| 3021 | 221.5248 | 15.13179 | 5.87 |
| 3022 | 221.5282 | -23.153  | 5.81 |
| 3023 | 221.5622 | 1.892886 | 3.73 |
| 3024 | 221.6208 | -47.4411 | 5.74 |
| 3025 | 221.7554 | -52.3835 | 5.23 |
| 3026 | 221.7712 | -38.2906 | 5.9  |
| 3027 | 221.844  | -25.6243 | 5.62 |
| 3028 | 221.9367 | -26.0875 | 5.24 |
| 3029 | 221.9655 | -79.0448 | 3.81 |
| 3030 | 221.9898 | -26.6462 | 5.77 |
| 3031 | 222.1585 | -36.6347 | 6    |
| 3032 | 222.1856 | -66.5936 | 5.89 |
| 3033 | 222.3278 | 46.11621 | 5.76 |
| 3034 | 222.3281 | -24.2515 | 5.7  |
| 3035 | 222.3294 | -14.149  | 5.6  |
| 3036 | 222.4221 | 48.7208  | 5.68 |
| 3037 | 222.4933 | 28.61583 | 5.79 |
| 3038 | 222.5659 | 23.91184 | 5.88 |
| 3039 | 222.5721 | -27.9604 | 4.42 |
| 3040 | 222.5851 | 82.51194 | 5.64 |
| 3041 | 222.6235 | 37.27205 | 5.48 |
| 3042 | 222.6716 | -15.9972 | 5.15 |
| 3043 | 222.6764 | 74.15551 | 2.06 |
| 3044 | 222.7196 | -16.0418 | 2.75 |
| 3045 | 222.7545 | -2.29915 | 4.93 |
| 3046 | 222.8474 | 19.10046 | 4.67 |
| 3047 | 222.8602 | 59.29399 | 5.48 |
| 3048 | 222.9096 | -43.5754 | 4.33 |
| 3049 | 223.1469 | -63.8098 | 5.95 |
| 3050 | 223.2128 | -37.8032 | 5.02 |
| 3051 | 223.3066 | -73.1901 | 5.59 |
| 3052 | 223.349  | 19.1528  | 5.99 |
| 3053 | 223.5839 | -24.6422 | 5.26 |
| 3054 | 223.5953 | -11.8983 | 5.79 |
| 3055 | 223.658  | -33.3006 | 5.84 |
| 3056 | 223.894  | -60.1142 | 5.18 |
| 3057 | 223.9363 | -33.8558 | 5.32 |
| 3058 | 224.0551 | 14.44627 | 5.91 |
| 3059 | 224.0719 | -52.8095 | 5.39 |
| 3060 | 224.096  | 49.62845 | 5.64 |
| 3061 | 224.1833 | -62.781  | 5.08 |
| 3062 | 224.1921 | -11.4097 | 5.46 |
| 3063 | 224.2958 | -4.34646 | 4.47 |
| 3064 | 224.2987 | 16.38813 | 5.72 |
| 3065 | 224.3667 | -21.4155 | 5.75 |
| 3066 | 224.3885 | -0.16761 | 5.51 |
| 3067 | 224.3959 | 65.93246 | 4.69 |
| 3068 | 224.4708 | -76.6627 | 5.37 |

|      |          |          |      |
|------|----------|----------|------|
| 3069 | 224.633  | -43.134  | 2.68 |
| 3070 | 224.6636 | -27.6573 | 5.67 |
| 3071 | 224.7233 | -11.144  | 5.86 |
| 3072 | 224.7904 | -42.1042 | 3.13 |
| 3073 | 224.8463 | 4.567761 | 5.92 |
| 3074 | 224.9039 | 39.26533 | 5.64 |
| 3075 | 225.0471 | -77.1606 | 5.93 |
| 3076 | 225.2431 | -8.51894 | 4.95 |
| 3077 | 225.3046 | -38.0584 | 5.87 |
| 3078 | 225.3326 | -2.75493 | 5.52 |
| 3079 | 225.3629 | 60.20445 | 5.92 |
| 3080 | 225.4538 | -0.1403  | 5.72 |
| 3081 | 225.4617 | -83.2276 | 5.65 |
| 3082 | 225.4865 | 40.39057 | 3.48 |
| 3083 | 225.5268 | -28.0606 | 5.83 |
| 3084 | 225.5271 | 25.00814 | 4.79 |
| 3085 | 225.7252 | 2.091303 | 4.4  |
| 3086 | 225.747  | -32.6433 | 5.44 |
| 3087 | 225.7752 | 35.2058  | 5.52 |
| 3088 | 225.9471 | 47.65406 | 4.83 |
| 3089 | 226.0176 | -25.282  | 3.28 |
| 3090 | 226.1114 | 26.94765 | 4.51 |
| 3091 | 226.1955 | -83.0383 | 5.64 |
| 3092 | 226.2008 | -64.0314 | 5.17 |
| 3093 | 226.3299 | -41.0672 | 5.14 |
| 3094 | 226.3576 | 48.15097 | 5.59 |
| 3095 | 226.5697 | 54.55632 | 5.25 |
| 3096 | 226.6383 | -30.9185 | 5.98 |
| 3097 | 226.6567 | -16.2568 | 5.19 |
| 3098 | 226.8253 | 24.8692  | 4.93 |
| 3099 | 226.8581 | -49.0886 | 5.77 |
| 3100 | 227.0505 | -40.5839 | 5.77 |
| 3101 | 227.0991 | 26.30115 | 5.67 |
| 3102 | 227.1482 | 25.10864 | 5.81 |
| 3103 | 227.1633 | -42.8679 | 5.83 |
| 3104 | 227.2109 | -45.2799 | 4.06 |
| 3105 | 227.3746 | -67.0841 | 5.77 |
| 3106 | 227.5305 | -38.7925 | 5.98 |
| 3107 | 227.5776 | -26.3326 | 5.75 |
| 3108 | 227.7867 | -84.7878 | 5.88 |
| 3109 | 227.8166 | -55.346  | 5.46 |
| 3110 | 228.0178 | 18.97603 | 5.95 |
| 3111 | 228.0554 | -19.7917 | 4.56 |
| 3112 | 228.0712 | -52.0992 | 3.41 |
| 3113 | 228.2066 | -44.5004 | 4.82 |
| 3114 | 228.4721 | -26.1936 | 5.86 |
| 3115 | 228.5252 | 31.78784 | 5.98 |
| 3116 | 228.5799 | -70.0795 | 5.62 |
| 3117 | 228.6215 | 29.16429 | 5.28 |
| 3118 | 228.6555 | -31.5191 | 4.92 |
| 3119 | 228.6597 | 67.34672 | 5.15 |
| 3120 | 228.7973 | 4.939365 | 5.34 |
| 3121 | 228.8757 | 33.31483 | 3.47 |
| 3122 | 228.9545 | 0.372139 | 5.63 |
| 3123 | 228.9736 | -48.0737 | 5.97 |
| 3124 | 229.0168 | -41.4912 | 5.17 |
| 3125 | 229.0959 | -22.3994 | 5.51 |
| 3126 | 229.1529 | -60.904  | 5.76 |
| 3127 | 229.2371 | -60.9573 | 5.08 |

|      |          |          |      |
|------|----------|----------|------|
| 3128 | 229.2517 | -9.38292 | 2.61 |
| 3129 | 229.2745 | 71.8239  | 5.01 |
| 3130 | 229.3785 | -58.8012 | 4.07 |
| 3131 | 229.412  | -63.6105 | 4.85 |
| 3132 | 229.4577 | -30.1487 | 4.34 |
| 3133 | 229.6021 | 20.57278 | 5.69 |
| 3134 | 229.6089 | -0.46123 | 5.87 |
| 3135 | 229.6331 | -47.8751 | 4.28 |
| 3136 | 229.7048 | -60.4963 | 5.44 |
| 3137 | 229.7274 | -68.6795 | 2.88 |
| 3138 | 229.7349 | -40.7882 | 5.6  |
| 3139 | 229.8283 | 1.765408 | 5.05 |
| 3140 | 230.0215 | 51.95852 | 5.65 |
| 3141 | 230.0357 | 29.61621 | 5.51 |
| 3142 | 230.1821 | 71.83402 | 3.03 |
| 3143 | 230.2583 | 0.715337 | 5.38 |
| 3144 | 230.2817 | -5.82485 | 5.54 |
| 3145 | 230.343  | -40.6475 | 3.22 |
| 3146 | 230.4506 | -48.3176 | 5.66 |
| 3147 | 230.4515 | -36.2614 | 3.56 |
| 3148 | 230.4524 | 32.93369 | 5.38 |
| 3149 | 230.5345 | -47.9278 | 4.99 |
| 3150 | 230.6552 | 62.04708 | 5.99 |
| 3151 | 230.6557 | 39.58146 | 5.54 |
| 3152 | 230.6601 | 63.34144 | 5.72 |
| 3153 | 230.6703 | -44.6896 | 3.38 |
| 3154 | 230.789  | -36.8585 | 4.53 |
| 3155 | 230.7938 | -60.6572 | 5.65 |
| 3156 | 230.9677 | -12.3695 | 5.72 |
| 3157 | 231.0495 | -10.3223 | 4.92 |
| 3158 | 231.1226 | 37.37717 | 4.3  |
| 3159 | 231.1875 | -39.7103 | 5.38 |
| 3160 | 231.2324 | 58.96607 | 3.3  |
| 3161 | 231.3342 | -38.7336 | 4.61 |
| 3162 | 231.4475 | 15.42804 | 5.15 |
| 3163 | 231.5613 | -68.3092 | 5.89 |
| 3164 | 231.5724 | 34.336   | 5.45 |
| 3165 | 231.8255 | -36.7676 | 5.45 |
| 3166 | 231.8878 | -64.5315 | 5.72 |
| 3167 | 231.9572 | 29.1057  | 3.66 |
| 3168 | 231.9643 | 60.67022 | 5.9  |
| 3169 | 232.0642 | -16.7165 | 5.64 |
| 3170 | 232.1593 | 1.842081 | 5.16 |
| 3171 | 232.3511 | -46.7327 | 5.24 |
| 3172 | 232.6683 | -16.6095 | 5.81 |
| 3173 | 232.7323 | 40.83305 | 5.03 |
| 3174 | 232.7324 | 64.20869 | 5.74 |
| 3175 | 232.8539 | 77.34935 | 4.99 |
| 3176 | 232.8784 | -73.3896 | 5.4  |
| 3177 | 232.9458 | 40.89933 | 5    |
| 3178 | 233.1529 | -19.6705 | 5.5  |
| 3179 | 233.2301 | -16.8528 | 5.5  |
| 3180 | 233.2324 | 31.35913 | 4.16 |
| 3181 | 233.2414 | -1.1864  | 5.51 |
| 3182 | 233.5071 | -40.0664 | 5.84 |
| 3183 | 233.5446 | -10.0645 | 4.61 |
| 3184 | 233.6105 | -9.18342 | 5.16 |
| 3185 | 233.6555 | -28.047  | 5.13 |
| 3186 | 233.672  | 26.71469 | 2.22 |

|      |          |          |      |
|------|----------|----------|------|
| 3187 | 233.7852 | -41.1668 | 2.78 |
| 3188 | 233.8122 | 39.01007 | 5.14 |
| 3189 | 233.8175 | 53.92214 | 5.97 |
| 3190 | 233.8816 | -14.7895 | 3.92 |
| 3191 | 233.9719 | -44.9584 | 4.55 |
| 3192 | 233.9877 | 54.63057 | 5.77 |
| 3193 | 234.0504 | -44.3968 | 5.44 |
| 3194 | 234.1218 | 16.11908 | 5.94 |
| 3195 | 234.1232 | 10.01018 | 5.26 |
| 3196 | 234.1801 | -66.317  | 4.11 |
| 3197 | 234.256  | -28.1351 | 3.6  |
| 3198 | 234.3834 | 54.50873 | 5.85 |
| 3199 | 234.413  | 69.28334 | 5.64 |
| 3200 | 234.4502 | -23.1417 | 5.79 |
| 3201 | 234.4567 | 40.35343 | 5.26 |
| 3202 | 234.5134 | -42.5673 | 4.34 |
| 3203 | 234.5676 | 46.79775 | 5.76 |
| 3204 | 234.5678 | -21.0163 | 5.82 |
| 3205 | 234.6425 | 50.42328 | 5.84 |
| 3206 | 234.664  | -29.7778 | 3.66 |
| 3207 | 234.7061 | -52.3727 | 5.43 |
| 3208 | 234.7273 | -19.3019 | 5.36 |
| 3209 | 234.9416 | -34.4119 | 4.66 |
| 3210 | 234.9856 | -59.9083 | 5.94 |
| 3211 | 235.0704 | -23.8181 | 4.95 |
| 3212 | 235.0889 | -73.4467 | 5.65 |
| 3213 | 235.2463 | 16.02459 | 5.99 |
| 3214 | 235.2974 | -44.6612 | 4.65 |
| 3215 | 235.3877 | 19.6704  | 4.51 |
| 3216 | 235.4476 | 12.84753 | 5.33 |
| 3217 | 235.4778 | -76.082  | 5.95 |
| 3218 | 235.478  | 18.46404 | 5.8  |
| 3219 | 235.4867 | -19.6788 | 4.75 |
| 3220 | 235.6596 | -37.4249 | 5.24 |
| 3221 | 235.6709 | -34.7104 | 4.73 |
| 3222 | 235.6857 | 26.29564 | 3.82 |
| 3223 | 235.7115 | 52.3609  | 5.49 |
| 3224 | 235.8205 | -84.4653 | 5.57 |
| 3225 | 235.9971 | 32.51581 | 5.57 |
| 3226 | 236.0076 | 2.515173 | 5.87 |
| 3227 | 236.0147 | 77.79449 | 4.29 |
| 3228 | 236.0183 | -15.6728 | 5.42 |
| 3229 | 236.067  | 6.425627 | 2.63 |
| 3230 | 236.3478 | 5.447315 | 5.57 |
| 3231 | 236.5235 | -1.80419 | 5.39 |
| 3232 | 236.5469 | 15.42183 | 3.66 |
| 3233 | 236.6109 | 7.353073 | 4.42 |
| 3234 | 236.6448 | 55.47479 | 5.93 |
| 3235 | 236.6667 | 62.59956 | 5.2  |
| 3236 | 236.6842 | -34.6825 | 5.61 |
| 3237 | 236.8222 | 14.11535 | 5.71 |
| 3238 | 236.908  | 55.37663 | 5.88 |
| 3239 | 237.0554 | 13.78908 | 5.98 |
| 3240 | 237.1434 | 28.15675 | 5.9  |
| 3241 | 237.1849 | 18.14156 | 4.09 |
| 3242 | 237.2367 | -3.81851 | 5.53 |
| 3243 | 237.3985 | 26.06839 | 4.6  |
| 3244 | 237.405  | -3.43021 | 3.55 |
| 3245 | 237.4896 | -48.9124 | 5.86 |

|      |          |          |      |
|------|----------|----------|------|
| 3246 | 237.5295 | -53.2098 | 5.78 |
| 3247 | 237.5731 | 2.196509 | 5.23 |
| 3248 | 237.704  | 4.47773  | 3.71 |
| 3249 | 237.7397 | -33.6272 | 3.96 |
| 3250 | 237.7448 | -25.7513 | 4.65 |
| 3251 | 237.7784 | -55.0555 | 5.77 |
| 3252 | 237.808  | 35.65738 | 4.81 |
| 3253 | 237.815  | -3.0905  | 5.1  |
| 3254 | 237.8163 | 20.97792 | 4.74 |
| 3255 | 237.8809 | -47.0608 | 6    |
| 3256 | 238.069  | 55.82671 | 5.8  |
| 3257 | 238.1689 | 42.45152 | 4.61 |
| 3258 | 238.3336 | -20.167  | 5.03 |
| 3259 | 238.403  | -25.3271 | 4.67 |
| 3260 | 238.4564 | -16.7293 | 4.13 |
| 3261 | 238.4746 | -24.5332 | 5.38 |
| 3262 | 238.4828 | -23.9781 | 5.41 |
| 3263 | 238.6442 | 20.31097 | 5.44 |
| 3264 | 238.6577 | 43.13857 | 5.36 |
| 3265 | 238.6647 | -25.2437 | 5.87 |
| 3266 | 238.7515 | -19.3829 | 5.96 |
| 3267 | 238.7857 | -63.4307 | 2.84 |
| 3268 | 238.8733 | -68.603  | 5.1  |
| 3269 | 238.8753 | -26.266  | 5.63 |
| 3270 | 238.8775 | 42.56619 | 5.75 |
| 3271 | 238.8849 | -60.1776 | 5.86 |
| 3272 | 238.9483 | 37.94696 | 5.44 |
| 3273 | 239.0246 | -60.4825 | 5.75 |
| 3274 | 239.1133 | 15.66162 | 3.85 |
| 3275 | 239.2212 | -29.2141 | 3.88 |
| 3276 | 239.3107 | 14.41448 | 5.54 |
| 3277 | 239.3389 | -36.1853 | 5.82 |
| 3278 | 239.3969 | 26.87788 | 4.14 |
| 3279 | 239.4186 | -20.9831 | 5.85 |
| 3280 | 239.4477 | 54.74976 | 4.96 |
| 3281 | 239.5474 | -14.2794 | 4.95 |
| 3282 | 239.6453 | -24.8315 | 5.44 |
| 3283 | 239.713  | -26.1141 | 2.89 |
| 3284 | 239.7405 | 36.64377 | 5.59 |
| 3285 | 239.7423 | -65.0376 | 5.75 |
| 3286 | 239.8761 | -41.7444 | 4.99 |
| 3287 | 240.0305 | -38.3967 | 3.43 |
| 3288 | 240.0816 | -16.5334 | 5.46 |
| 3289 | 240.0834 | -22.6217 | 2.3  |
| 3290 | 240.1985 | -8.41135 | 5.53 |
| 3291 | 240.2131 | 4.427363 | 5.82 |
| 3292 | 240.2611 | 33.30351 | 5.4  |
| 3293 | 240.3097 | 17.8184  | 5.11 |
| 3294 | 240.3607 | 29.85106 | 4.98 |
| 3295 | 240.4723 | 58.56525 | 4.01 |
| 3296 | 240.5232 | 52.91592 | 5.91 |
| 3297 | 240.5737 | 22.80445 | 4.82 |
| 3298 | 240.6996 | 46.03671 | 4.72 |
| 3299 | 240.8037 | -49.2297 | 4.64 |
| 3300 | 240.8307 | 36.63179 | 5.81 |
| 3301 | 240.8359 | -25.8652 | 4.97 |
| 3302 | 240.8508 | -38.6025 | 4.89 |
| 3303 | 240.8806 | 76.79394 | 5.73 |
| 3304 | 240.8836 | -57.7751 | 4.66 |

|      |          |          |      |
|------|----------|----------|------|
| 3305 | 240.8932 | -32.0005 | 6    |
| 3306 | 241.0922 | -11.3731 | 4.16 |
| 3307 | 241.1534 | -37.863  | 5.91 |
| 3308 | 241.4826 | -72.4009 | 5.69 |
| 3309 | 241.5266 | -23.6063 | 5.9  |
| 3310 | 241.582  | 67.81013 | 5.44 |
| 3311 | 241.6227 | -45.1732 | 4.72 |
| 3312 | 241.6481 | -36.8023 | 4.22 |
| 3313 | 241.7018 | -20.6692 | 3.95 |
| 3314 | 241.8176 | -36.7557 | 5.71 |
| 3315 | 241.8514 | -20.8688 | 4.32 |
| 3316 | 241.9017 | -12.7454 | 5.76 |
| 3317 | 241.9064 | 9.891743 | 5.64 |
| 3318 | 242.0189 | 17.04698 | 5    |
| 3319 | 242.0316 | -26.3267 | 5.37 |
| 3320 | 242.117  | 8.53431  | 5.74 |
| 3321 | 242.1822 | -23.6854 | 5.86 |
| 3322 | 242.1924 | 44.93491 | 4.24 |
| 3323 | 242.2429 | 36.49094 | 4.73 |
| 3324 | 242.2453 | 3.454475 | 5.92 |
| 3325 | 242.2967 | 6.378695 | 5.94 |
| 3326 | 242.3273 | -57.9343 | 5.58 |
| 3327 | 242.4605 | -3.46673 | 5.39 |
| 3328 | 242.4691 | -33.5458 | 5.5  |
| 3329 | 242.7064 | 75.87756 | 5.48 |
| 3330 | 242.7586 | -29.4162 | 5.1  |
| 3331 | 242.8238 | -41.1198 | 5.86 |
| 3332 | 242.9085 | 23.4948  | 5.82 |
| 3333 | 242.9483 | 42.37457 | 5.87 |
| 3334 | 242.9502 | 36.42509 | 5.63 |
| 3335 | 242.9989 | -19.4607 | 4.13 |
| 3336 | 243      | -10.0643 | 4.94 |
| 3337 | 243.0305 | -8.54758 | 5.44 |
| 3338 | 243.0668 | -28.4173 | 5.67 |
| 3339 | 243.0759 | -27.9264 | 4.58 |
| 3340 | 243.3143 | 5.021086 | 5.46 |
| 3341 | 243.3207 | -53.6712 | 5.98 |
| 3342 | 243.3446 | -55.5409 | 5.79 |
| 3343 | 243.3697 | -54.6305 | 4.95 |
| 3344 | 243.4621 | -11.8377 | 5.24 |
| 3345 | 243.5864 | -3.69432 | 2.73 |
| 3346 | 243.5932 | -33.0111 | 5.92 |
| 3347 | 243.6702 | 33.85861 | 5.54 |
| 3348 | 243.8138 | -47.372  | 5.13 |
| 3349 | 243.8595 | -63.6857 | 3.85 |
| 3350 | 243.8693 | 18.80809 | 5.71 |
| 3351 | 243.9053 | -8.36944 | 5.49 |
| 3352 | 243.9575 | -57.9123 | 5.63 |
| 3353 | 244.1803 | -53.8111 | 5.47 |
| 3354 | 244.1866 | 29.15026 | 5.79 |
| 3355 | 244.2539 | -50.0681 | 4.98 |
| 3356 | 244.2726 | -67.9413 | 5.95 |
| 3357 | 244.3139 | 59.75502 | 5.43 |
| 3358 | 244.3762 | 75.75533 | 4.96 |
| 3359 | 244.5746 | -28.614  | 4.79 |
| 3360 | 244.5804 | -4.69251 | 3.24 |
| 3361 | 244.7518 | -14.8728 | 6    |
| 3362 | 244.7967 | 49.03816 | 5.92 |
| 3363 | 244.8235 | -42.674  | 5.44 |

|      |          |          |      |
|------|----------|----------|------|
| 3364 | 244.8864 | -30.9067 | 5.5  |
| 3365 | 244.9352 | 46.31337 | 3.9  |
| 3366 | 244.9601 | -50.1555 | 4.01 |
| 3367 | 244.9798 | 39.70858 | 5.49 |
| 3368 | 245.1052 | -55.1397 | 5.75 |
| 3369 | 245.1591 | -24.1693 | 4.59 |
| 3370 | 245.2972 | -25.5928 | 2.91 |
| 3371 | 245.453  | 69.10939 | 5.27 |
| 3372 | 245.4801 | 19.15313 | 3.74 |
| 3373 | 245.5181 | 1.029039 | 4.82 |
| 3374 | 245.5243 | 30.892   | 4.85 |
| 3375 | 245.5893 | 33.79905 | 5.21 |
| 3376 | 245.6166 | -49.5724 | 5.33 |
| 3377 | 245.6211 | -43.9121 | 5.91 |
| 3378 | 245.6217 | 33.70348 | 5.4  |
| 3379 | 245.9979 | 61.51421 | 2.73 |
| 3380 | 246.0054 | -39.193  | 5.37 |
| 3381 | 246.0258 | -20.0373 | 4.49 |
| 3382 | 246.0451 | 6.948207 | 5.83 |
| 3383 | 246.1056 | 55.2051  | 5.75 |
| 3384 | 246.1323 | -37.566  | 5.42 |
| 3385 | 246.3507 | 37.39408 | 5.54 |
| 3386 | 246.354  | 14.03327 | 4.58 |
| 3387 | 246.4299 | 78.96385 | 5.56 |
| 3388 | 246.756  | -18.4563 | 4.26 |
| 3389 | 246.796  | -47.5548 | 4.53 |
| 3390 | 246.9311 | -7.59793 | 5.25 |
| 3391 | 246.9508 | -8.37173 | 4.64 |
| 3392 | 246.9889 | -64.0579 | 5.29 |
| 3393 | 246.9959 | 68.76814 | 4.97 |
| 3394 | 247.0603 | -37.1799 | 5.79 |
| 3395 | 247.0632 | -58.5998 | 5.68 |
| 3396 | 247.1173 | -70.0844 | 4.91 |
| 3397 | 247.1416 | 0.665002 | 5.39 |
| 3398 | 247.1606 | 41.88168 | 4.9  |
| 3399 | 247.3519 | -26.432  | 1.07 |
| 3400 | 247.4264 | -46.2432 | 5.35 |
| 3401 | 247.4455 | -14.5509 | 5.67 |
| 3402 | 247.552  | -25.1152 | 4.79 |
| 3403 | 247.555  | 21.48961 | 2.78 |
| 3404 | 247.6398 | 20.47919 | 5.24 |
| 3405 | 247.7057 | -61.6335 | 5.18 |
| 3406 | 247.7284 | 1.983923 | 3.9  |
| 3407 | 247.7849 | -16.6127 | 4.29 |
| 3408 | 247.806  | 22.19546 | 5.77 |
| 3409 | 247.8456 | -34.7044 | 4.24 |
| 3410 | 247.924  | -41.8171 | 5.32 |
| 3411 | 247.9468 | 45.59828 | 5.67 |
| 3412 | 248.0342 | -21.4664 | 4.44 |
| 3413 | 248.107  | 60.82332 | 5.93 |
| 3414 | 248.1487 | 5.52122  | 5.63 |
| 3415 | 248.1512 | 11.48804 | 4.84 |
| 3416 | 248.3628 | -78.8971 | 3.87 |
| 3417 | 248.5209 | -44.0453 | 4.92 |
| 3418 | 248.5258 | 42.43704 | 4.21 |
| 3419 | 248.5806 | -70.9881 | 5.49 |
| 3420 | 248.9367 | -65.4954 | 5.5  |
| 3421 | 248.9706 | -28.216  | 2.83 |
| 3422 | 249.0467 | 46.61333 | 5.82 |

|      |          |          |      |
|------|----------|----------|------|
| 3423 | 249.0894 | -2.32458 | 5.77 |
| 3424 | 249.0936 | -35.2553 | 4.17 |
| 3425 | 249.094  | -42.8589 | 5.47 |
| 3426 | 249.2897 | -10.5671 | 2.58 |
| 3427 | 249.5019 | 56.01554 | 5.28 |
| 3428 | 249.6095 | -43.3984 | 5.86 |
| 3429 | 249.6869 | 48.92834 | 4.88 |
| 3430 | 249.7718 | -37.2174 | 5.93 |
| 3431 | 250.1612 | 4.219789 | 5.78 |
| 3432 | 250.2297 | 64.58905 | 4.84 |
| 3433 | 250.3215 | 31.60273 | 2.85 |
| 3434 | 250.3351 | -48.763  | 5.57 |
| 3435 | 250.3463 | -68.2961 | 5.89 |
| 3436 | 250.3933 | -17.7422 | 4.92 |
| 3437 | 250.4029 | 26.91688 | 5.92 |
| 3438 | 250.4176 | -49.6516 | 5.66 |
| 3439 | 250.427  | 1.181231 | 5.73 |
| 3440 | 250.4394 | -33.1458 | 5.84 |
| 3441 | 250.4737 | -19.9244 | 5.57 |
| 3442 | 250.724  | 38.92225 | 3.48 |
| 3443 | 250.7694 | -77.5174 | 4.23 |
| 3444 | 251.1656 | -53.1523 | 5.97 |
| 3445 | 251.1775 | -40.8397 | 5.65 |
| 3446 | 251.2508 | -28.5097 | 5.99 |
| 3447 | 251.3242 | 56.78186 | 4.85 |
| 3448 | 251.3438 | 15.74529 | 5.63 |
| 3449 | 251.4579 | 8.582616 | 5.14 |
| 3450 | 251.4927 | 82.03726 | 4.22 |
| 3451 | 251.5884 | -58.5036 | 5.74 |
| 3452 | 251.6666 | -67.1097 | 5.11 |
| 3453 | 251.6998 | -39.377  | 5.49 |
| 3454 | 251.8319 | -58.3414 | 5.58 |
| 3455 | 251.8323 | 42.23892 | 5.92 |
| 3456 | 251.9434 | 5.246746 | 5.22 |
| 3457 | 252.1662 | -69.0277 | 1.91 |
| 3458 | 252.3092 | 45.98332 | 4.82 |
| 3459 | 252.3944 | 13.26114 | 5.93 |
| 3460 | 252.4465 | -59.0414 | 3.76 |
| 3461 | 252.4585 | -10.783  | 4.64 |
| 3462 | 252.5409 | -34.2932 | 2.29 |
| 3463 | 252.5808 | 7.247683 | 5.48 |
| 3464 | 252.6623 | 29.80654 | 5.72 |
| 3465 | 252.8539 | 1.215947 | 5.51 |
| 3466 | 252.8905 | -41.2305 | 5.25 |
| 3467 | 252.9386 | 24.65643 | 5.03 |
| 3468 | 252.9676 | -38.0474 | 3    |
| 3469 | 253.0839 | -38.0175 | 3.56 |
| 3470 | 253.2419 | 31.70167 | 5.34 |
| 3471 | 253.3232 | 47.41673 | 5.98 |
| 3472 | 253.3551 | -20.4156 | 5.87 |
| 3473 | 253.4989 | -42.362  | 4.77 |
| 3474 | 253.5015 | -57.9095 | 5.92 |
| 3475 | 253.502  | 10.16536 | 4.37 |
| 3476 | 253.5077 | -41.8064 | 5.45 |
| 3477 | 253.6123 | -42.4789 | 5.85 |
| 3478 | 253.6459 | -42.3613 | 3.61 |
| 3479 | 253.6487 | -6.15398 | 5.23 |
| 3480 | 253.7299 | 20.95849 | 5.4  |
| 3481 | 253.7438 | -41.1509 | 5.82 |

|      |          |          |      |
|------|----------|----------|------|
| 3482 | 253.8424 | 18.43321 | 5.35 |
| 3483 | 254.007  | 65.1348  | 4.88 |
| 3484 | 254.1199 | -52.2837 | 5.94 |
| 3485 | 254.2002 | -23.1503 | 5.59 |
| 3486 | 254.2966 | -33.2595 | 5.48 |
| 3487 | 254.4171 | 9.375033 | 3.19 |
| 3488 | 254.5747 | -50.6412 | 5.54 |
| 3489 | 254.655  | -55.9901 | 3.11 |
| 3490 | 254.8915 | -69.2682 | 5.8  |
| 3491 | 254.896  | -53.1604 | 4.05 |
| 3492 | 254.9904 | -25.0922 | 5.9  |
| 3493 | 255.0262 | -54.5972 | 5.65 |
| 3494 | 255.0396 | -24.9891 | 5.74 |
| 3495 | 255.0724 | 30.9264  | 3.91 |
| 3496 | 255.1541 | -35.9341 | 5.94 |
| 3497 | 255.2422 | 22.6321  | 5.66 |
| 3498 | 255.265  | -4.22264 | 4.81 |
| 3499 | 255.4015 | 33.56827 | 5.28 |
| 3500 | 255.4693 | -32.1435 | 5.02 |
| 3501 | 255.5779 | 25.50562 | 5.77 |
| 3502 | 255.7828 | 14.09195 | 4.98 |
| 3503 | 255.7863 | -53.237  | 5.28 |
| 3504 | 255.9138 | 13.60535 | 5.92 |
| 3505 | 255.9623 | -38.1526 | 5.91 |
| 3506 | 256.103  | -57.7122 | 5.74 |
| 3507 | 256.2056 | -34.1229 | 4.86 |
| 3508 | 256.3201 | 0.702559 | 6    |
| 3509 | 256.3445 | 12.74083 | 4.88 |
| 3510 | 256.3844 | -0.89207 | 5.64 |
| 3511 | 256.5752 | 22.08415 | 5.57 |
| 3512 | 256.5841 | -37.2276 | 5.98 |
| 3513 | 257.0086 | 35.93517 | 5.41 |
| 3514 | 257.0619 | -17.6091 | 5.98 |
| 3515 | 257.1966 | 65.71468 | 3.18 |
| 3516 | 257.1981 | -30.4037 | 5.92 |
| 3517 | 257.3885 | 40.77703 | 5.07 |
| 3518 | 257.4498 | -10.5233 | 5.43 |
| 3519 | 257.5945 | -15.7249 | 2.43 |
| 3520 | 257.6763 | -44.5577 | 5.06 |
| 3521 | 257.9112 | -48.8734 | 5.96 |
| 3522 | 258.0383 | -43.2392 | 3.32 |
| 3523 | 258.0675 | -39.5069 | 5.67 |
| 3524 | 258.1159 | 10.58517 | 5.33 |
| 3525 | 258.1357 | 62.87434 | 5.55 |
| 3526 | 258.244  | -32.4383 | 6    |
| 3527 | 258.3245 | -67.1966 | 5.88 |
| 3528 | 258.758  | 24.8392  | 3.13 |
| 3529 | 258.7618 | 36.80916 | 3.14 |
| 3530 | 258.8302 | -33.5484 | 5.62 |
| 3531 | 258.8345 | -14.5841 | 6    |
| 3532 | 258.8998 | -38.5939 | 5.95 |
| 3533 | 258.9228 | 23.74276 | 5.98 |
| 3534 | 259.1321 | 1.210546 | 5.91 |
| 3535 | 259.1529 | -0.4453  | 4.74 |
| 3536 | 259.2652 | -32.6628 | 5.53 |
| 3537 | 259.3315 | 33.1001  | 4.81 |
| 3538 | 259.4177 | 37.2915  | 4.63 |
| 3539 | 259.5028 | -24.2869 | 5.11 |
| 3540 | 259.597  | 38.81139 | 5.97 |

|      |          |          |      |
|------|----------|----------|------|
| 3541 | 259.6541 | 10.86448 | 5.02 |
| 3542 | 259.6993 | -44.1297 | 5.75 |
| 3543 | 259.7022 | 28.82297 | 5.68 |
| 3544 | 259.7382 | -34.9898 | 5.91 |
| 3545 | 259.766  | -46.6362 | 5.47 |
| 3546 | 259.8021 | -59.6946 | 5.9  |
| 3547 | 259.9046 | 80.1364  | 5.72 |
| 3548 | 260.041  | 25.5376  | 5.37 |
| 3549 | 260.0786 | 18.05708 | 5.01 |
| 3550 | 260.088  | 46.24078 | 5.5  |
| 3551 | 260.1649 | 32.46774 | 5.39 |
| 3552 | 260.2069 | -12.8469 | 4.34 |
| 3553 | 260.2259 | 24.49944 | 5.13 |
| 3554 | 260.2516 | -21.1129 | 4.39 |
| 3555 | 260.4317 | 39.97465 | 5.56 |
| 3556 | 260.439  | 53.42043 | 5.68 |
| 3557 | 260.4978 | -67.7707 | 4.76 |
| 3558 | 260.5024 | -24.9995 | 3.26 |
| 3559 | 260.5245 | -70.1232 | 5.4  |
| 3560 | 260.7281 | -37.2208 | 5.92 |
| 3561 | 260.7301 | -58.0103 | 5.86 |
| 3562 | 260.7797 | -56.5255 | 5.77 |
| 3563 | 260.817  | -47.4682 | 5.26 |
| 3564 | 260.84   | -28.1428 | 5.3  |
| 3565 | 260.9901 | 8.852571 | 5.76 |
| 3566 | 261.0045 | -62.8642 | 5.69 |
| 3567 | 261.0274 | 22.96029 | 5.71 |
| 3568 | 261.0545 | -44.1626 | 5.11 |
| 3569 | 261.0783 | -60.6738 | 5.77 |
| 3570 | 261.1314 | 16.30101 | 5.75 |
| 3571 | 261.1751 | -21.4415 | 5.83 |
| 3572 | 261.325  | -55.5299 | 2.82 |
| 3573 | 261.3486 | -56.3777 | 3.32 |
| 3574 | 261.4223 | 60.0484  | 5.65 |
| 3575 | 261.5002 | -50.6335 | 5.2  |
| 3576 | 261.5926 | -24.1753 | 4.16 |
| 3577 | 261.6287 | 4.14036  | 4.32 |
| 3578 | 261.6578 | -5.0866  | 4.54 |
| 3579 | 261.6843 | 48.26006 | 5.84 |
| 3580 | 261.6923 | 34.6958  | 5.94 |
| 3581 | 261.7047 | 20.08098 | 5.52 |
| 3582 | 261.7166 | -45.843  | 5.6  |
| 3583 | 261.8019 | -50.6304 | 5.91 |
| 3584 | 261.8386 | -29.867  | 4.28 |
| 3585 | 261.9065 | -29.7246 | 5.99 |
| 3586 | 261.99   | -52.2972 | 5.73 |
| 3587 | 262.1621 | -55.1697 | 5.92 |
| 3588 | 262.2069 | 0.330625 | 5.42 |
| 3589 | 262.2337 | -36.7783 | 5.99 |
| 3590 | 262.5992 | -1.06292 | 5.33 |
| 3591 | 262.6082 | 52.30139 | 2.8  |
| 3592 | 262.6846 | 26.11065 | 4.39 |
| 3593 | 262.691  | -37.2958 | 2.68 |
| 3594 | 262.6983 | 86.96805 | 5.77 |
| 3595 | 262.7307 | 31.15814 | 5.63 |
| 3596 | 262.7746 | -60.6838 | 3.6  |
| 3597 | 262.8389 | 2.724507 | 5.58 |
| 3598 | 262.847  | -56.921  | 5.99 |
| 3599 | 262.854  | -23.9626 | 4.8  |

|      |          |          |      |
|------|----------|----------|------|
| 3600 | 262.8644 | -80.8591 | 5.87 |
| 3601 | 262.9566 | 28.4075  | 5.66 |
| 3602 | 262.9604 | -49.8761 | 2.85 |
| 3603 | 262.9911 | 68.13502 | 5.08 |
| 3604 | 263.0542 | 86.58646 | 4.35 |
| 3605 | 263.2802 | 41.24345 | 5.73 |
| 3606 | 263.2808 | -41.1731 | 5.85 |
| 3607 | 263.3451 | 19.25668 | 5.65 |
| 3608 | 263.3744 | -5.7448  | 5.62 |
| 3609 | 263.4022 | -37.1038 | 1.63 |
| 3610 | 263.4141 | 16.31755 | 5.69 |
| 3611 | 263.6529 | 9.5867   | 5.8  |
| 3612 | 263.6771 | -32.5817 | 5.69 |
| 3613 | 263.6931 | -11.242  | 5.54 |
| 3614 | 263.7336 | 12.56003 | 2.09 |
| 3615 | 263.7483 | 61.87455 | 5.25 |
| 3616 | 263.915  | -46.5057 | 4.58 |
| 3617 | 264.1368 | -38.6353 | 4.27 |
| 3618 | 264.1569 | 48.58563 | 5.36 |
| 3619 | 264.2379 | 68.75797 | 4.78 |
| 3620 | 264.287  | 72.45579 | 5.88 |
| 3621 | 264.3297 | -42.9978 | 1.86 |
| 3622 | 264.3638 | -50.0597 | 5.89 |
| 3623 | 264.3796 | 24.30999 | 5.76 |
| 3624 | 264.3967 | -15.3986 | 3.54 |
| 3625 | 264.4009 | -15.571  | 5.94 |
| 3626 | 264.4613 | -8.11877 | 4.62 |
| 3627 | 264.523  | -54.5004 | 5.25 |
| 3628 | 264.5396 | -10.9263 | 5.74 |
| 3629 | 264.8662 | 46.00633 | 3.81 |
| 3630 | 265.0993 | -49.4156 | 4.76 |
| 3631 | 265.3177 | -46.9218 | 5.79 |
| 3632 | 265.3407 | 51.81818 | 5.99 |
| 3633 | 265.3536 | -12.8753 | 4.24 |
| 3634 | 265.3847 | 6.313156 | 5.96 |
| 3635 | 265.4943 | 15.95243 | 5.55 |
| 3636 | 265.6182 | 24.56406 | 5.56 |
| 3637 | 265.622  | -39.03   | 2.39 |
| 3638 | 265.7129 | -36.9456 | 5.53 |
| 3639 | 265.8399 | 24.32782 | 5.73 |
| 3640 | 265.8575 | -21.6832 | 4.87 |
| 3641 | 265.8681 | 4.567303 | 2.77 |
| 3642 | 265.9966 | 53.80172 | 5.75 |
| 3643 | 266.0363 | -51.8341 | 5.12 |
| 3644 | 266.175  | -42.7293 | 5.88 |
| 3645 | 266.2328 | -57.5455 | 5.97 |
| 3646 | 266.4333 | -64.7239 | 3.59 |
| 3647 | 266.6147 | 27.72068 | 3.42 |
| 3648 | 266.7835 | 17.69701 | 5.62 |
| 3649 | 266.8901 | -27.8308 | 4.56 |
| 3650 | 266.8962 | -40.127  | 3.01 |
| 3651 | 266.9032 | -14.7258 | 5.94 |
| 3652 | 266.9732 | 2.707276 | 3.75 |
| 3653 | 267.1032 | 20.56544 | 5.7  |
| 3654 | 267.2048 | 25.62287 | 5.1  |
| 3655 | 267.2679 | 50.78108 | 5.02 |
| 3656 | 267.2937 | -31.7032 | 4.81 |
| 3657 | 267.3626 | 76.96288 | 5.03 |
| 3658 | 267.4645 | -37.0433 | 3.19 |

|      |          |          |      |
|------|----------|----------|------|
| 3659 | 267.5463 | -40.0904 | 4.81 |
| 3660 | 267.5954 | 29.32214 | 5.52 |
| 3661 | 267.6183 | -53.6124 | 5.68 |
| 3662 | 267.8856 | -40.7725 | 5.96 |
| 3663 | 267.8978 | -60.1641 | 5.78 |
| 3664 | 268.0569 | -34.7992 | 5.89 |
| 3665 | 268.0823 | -34.4168 | 5.84 |
| 3666 | 268.1477 | 1.305014 | 5.92 |
| 3667 | 268.3091 | 6.101424 | 5.77 |
| 3668 | 268.3251 | 40.00796 | 5.17 |
| 3669 | 268.3478 | -34.8951 | 5.59 |
| 3670 | 268.3822 | 56.87264 | 3.74 |
| 3671 | 268.4782 | -34.7527 | 6    |
| 3672 | 268.7965 | 72.00513 | 5.42 |
| 3673 | 268.855  | 26.04999 | 5.47 |
| 3674 | 268.9617 | 22.46422 | 5.62 |
| 3675 | 269.0633 | 37.25054 | 3.84 |
| 3676 | 269.0767 | 0.670355 | 5.84 |
| 3677 | 269.0793 | -15.8125 | 5.93 |
| 3678 | 269.1515 | 51.4889  | 2.23 |
| 3679 | 269.1743 | -28.0654 | 5.79 |
| 3680 | 269.1976 | -44.3422 | 4.86 |
| 3681 | 269.1989 | -4.08182 | 5.45 |
| 3682 | 269.268  | 0.066665 | 5.95 |
| 3683 | 269.4412 | 29.24788 | 3.7  |
| 3684 | 269.4492 | -41.7163 | 4.88 |
| 3685 | 269.6256 | 30.18928 | 4.41 |
| 3686 | 269.6627 | -28.7591 | 5.97 |
| 3687 | 269.732  | -36.8584 | 5.74 |
| 3688 | 269.7566 | -9.77363 | 3.32 |
| 3689 | 269.772  | -30.253  | 5.16 |
| 3690 | 269.9032 | -4.82113 | 5.85 |
| 3691 | 269.9481 | -23.8161 | 4.74 |
| 3692 | 269.9842 | 45.50138 | 5.69 |
| 3693 | 270.0142 | 16.75092 | 4.67 |
| 3694 | 270.0384 | 80.0041  | 5.68 |
| 3695 | 270.0658 | 4.368615 | 4.79 |
| 3696 | 270.1209 | -3.69027 | 4.63 |
| 3697 | 270.1613 | 2.931568 | 3.98 |
| 3698 | 270.4383 | 1.305076 | 4.44 |
| 3699 | 270.4766 | -22.7803 | 5.76 |
| 3700 | 270.596  | 20.83363 | 5.26 |
| 3701 | 270.7129 | -24.2825 | 5.37 |
| 3702 | 270.9685 | -24.3607 | 5.89 |
| 3703 | 271.2099 | -35.9014 | 5.97 |
| 3704 | 271.2551 | -29.5801 | 4.65 |
| 3705 | 271.3637 | 2.500099 | 4.03 |
| 3706 | 271.452  | -30.4241 | 3.63 |
| 3707 | 271.4567 | 32.23067 | 5.72 |
| 3708 | 271.5079 | 22.21888 | 4.99 |
| 3709 | 271.5308 | -8.32396 | 5.85 |
| 3710 | 271.5633 | -4.75125 | 5.74 |
| 3711 | 271.5988 | -36.0198 | 5.94 |
| 3712 | 271.6578 | -50.0915 | 3.67 |
| 3713 | 271.7564 | 30.56214 | 5.06 |
| 3714 | 271.8265 | 8.733867 | 4.64 |
| 3715 | 271.8374 | 9.563847 | 3.72 |
| 3716 | 271.8698 | 43.46189 | 5.01 |
| 3717 | 271.8856 | 28.76249 | 3.84 |

|      |          |          |      |
|------|----------|----------|------|
| 3718 | 271.9514 | -17.1542 | 5.51 |
| 3719 | 272.0093 | 36.40126 | 5.49 |
| 3720 | 272.0207 | -28.4571 | 4.56 |
| 3721 | 272.1451 | -63.6686 | 4.33 |
| 3722 | 272.1895 | 20.81456 | 4.37 |
| 3723 | 272.2203 | 20.04523 | 5.11 |
| 3724 | 272.3912 | 3.993276 | 5.71 |
| 3725 | 272.4751 | 3.119827 | 5.67 |
| 3726 | 272.4958 | 36.46628 | 5.56 |
| 3727 | 272.609  | -62.0022 | 5.48 |
| 3728 | 272.6318 | 54.28655 | 5.97 |
| 3729 | 272.6679 | 3.324256 | 5.49 |
| 3730 | 272.7732 | -41.3591 | 5.86 |
| 3731 | 272.8073 | -45.9544 | 4.52 |
| 3732 | 272.8158 | -75.8915 | 5.86 |
| 3733 | 272.9306 | -23.7012 | 4.96 |
| 3734 | 272.938  | 33.44706 | 5.99 |
| 3735 | 272.9757 | 31.40535 | 4.98 |
| 3736 | 273.1419 | -73.6724 | 5.9  |
| 3737 | 273.3029 | -41.3361 | 5.47 |
| 3738 | 273.4409 | -21.0588 | 3.84 |
| 3739 | 273.4743 | 64.39729 | 5    |
| 3740 | 273.5663 | -21.7132 | 5.48 |
| 3741 | 273.8038 | -20.7283 | 5.35 |
| 3742 | 273.804  | -20.388  | 5.98 |
| 3743 | 273.8212 | 68.75581 | 5.96 |
| 3744 | 273.9116 | 42.15935 | 5.57 |
| 3745 | 273.9192 | -63.0554 | 5.59 |
| 3746 | 273.9727 | -44.2065 | 5.45 |
| 3747 | 274.2814 | -56.0234 | 5.37 |
| 3748 | 274.2985 | -17.3739 | 5.8  |
| 3749 | 274.4068 | -36.7617 | 3.13 |
| 3750 | 274.5133 | -27.0426 | 4.65 |
| 3751 | 274.7897 | 7.259767 | 5.42 |
| 3752 | 274.7945 | 24.44606 | 5.28 |
| 3753 | 274.9655 | 36.06455 | 4.32 |
| 3754 | 274.967  | 29.66639 | 6    |
| 3755 | 275.0366 | -15.8317 | 5.39 |
| 3756 | 275.0746 | 21.9613  | 4.93 |
| 3757 | 275.1893 | 71.33781 | 4.23 |
| 3758 | 275.2169 | 3.377165 | 4.85 |
| 3759 | 275.2374 | 29.85893 | 5.61 |
| 3760 | 275.2485 | -29.8281 | 2.7  |
| 3761 | 275.2543 | 28.86995 | 5.13 |
| 3762 | 275.2641 | 72.73284 | 3.57 |
| 3763 | 275.3275 | -2.89883 | 3.25 |
| 3764 | 275.3458 | -18.86   | 5.77 |
| 3765 | 275.3861 | 49.12159 | 5.03 |
| 3766 | 275.5363 | 23.28518 | 5.42 |
| 3767 | 275.5774 | -38.6569 | 5.07 |
| 3768 | 275.6472 | 12.02968 | 5.98 |
| 3769 | 275.7043 | 17.82662 | 5.25 |
| 3770 | 275.7212 | -36.6696 | 5.35 |
| 3771 | 275.8007 | -12.0148 | 5.71 |
| 3772 | 275.8068 | -61.4939 | 4.36 |
| 3773 | 275.8701 | -36.238  | 5.52 |
| 3774 | 275.9019 | -75.0443 | 5.47 |
| 3775 | 275.9149 | -8.93438 | 4.67 |
| 3776 | 275.9245 | 21.76975 | 3.85 |

|      |          |          |      |
|------|----------|----------|------|
| 3777 | 275.9775 | 58.80074 | 5.04 |
| 3778 | 276.043  | -34.3846 | 1.81 |
| 3779 | 276.0574 | 39.50724 | 5.12 |
| 3780 | 276.076  | -44.1103 | 5.24 |
| 3781 | 276.2559 | -30.7566 | 5.58 |
| 3782 | 276.3377 | -20.5417 | 4.86 |
| 3783 | 276.4117 | 8.032006 | 5.66 |
| 3784 | 276.4949 | 29.82893 | 5.82 |
| 3785 | 276.4964 | 65.56348 | 4.83 |
| 3786 | 276.7251 | -48.1172 | 5.45 |
| 3787 | 276.7434 | -45.9685 | 3.49 |
| 3788 | 276.7676 | -53.1102 | 5.97 |
| 3789 | 276.8021 | 0.196108 | 5.2  |
| 3790 | 276.9562 | -29.8169 | 5.91 |
| 3791 | 276.9927 | -25.4217 | 2.83 |
| 3792 | 276.9949 | 6.194104 | 5.71 |
| 3793 | 277.113  | -38.9957 | 5.64 |
| 3794 | 277.2077 | -49.0706 | 4.11 |
| 3795 | 277.2994 | -14.5658 | 4.69 |
| 3796 | 277.3331 | -80.2327 | 5.95 |
| 3797 | 277.3988 | 23.8662  | 5.88 |
| 3798 | 277.4207 | -1.98531 | 5.38 |
| 3799 | 277.4374 | 77.54707 | 5.64 |
| 3800 | 277.4831 | -47.2205 | 5.68 |
| 3801 | 277.4864 | -57.5231 | 5.75 |
| 3802 | 277.5494 | -18.7288 | 5.63 |
| 3803 | 277.7685 | 16.92856 | 5.76 |
| 3804 | 277.7702 | -32.9891 | 5.39 |
| 3805 | 277.8434 | -62.2783 | 4.62 |
| 3806 | 277.8571 | -10.7958 | 5.76 |
| 3807 | 277.8596 | -18.4027 | 5.13 |
| 3808 | 277.9393 | -45.9148 | 4.93 |
| 3809 | 277.9843 | -43.5074 | 5.69 |
| 3810 | 277.9875 | -1.00298 | 5.95 |
| 3811 | 278.0081 | -45.7574 | 5.08 |
| 3812 | 278.0889 | -39.704  | 5.16 |
| 3813 | 278.1438 | 57.0456  | 4.78 |
| 3814 | 278.1805 | -14.8657 | 5.5  |
| 3815 | 278.1923 | 23.6168  | 5.86 |
| 3816 | 278.2082 | 30.55421 | 5.47 |
| 3817 | 278.2306 | -73.9656 | 5.88 |
| 3818 | 278.3464 | -38.726  | 5.61 |
| 3819 | 278.3758 | -42.3125 | 4.62 |
| 3820 | 278.4126 | -14.8536 | 5.74 |
| 3821 | 278.4729 | -24.0323 | 5.5  |
| 3822 | 278.4862 | 52.35353 | 5.37 |
| 3823 | 278.4907 | -33.0166 | 5.28 |
| 3824 | 278.76   | -10.9772 | 5.13 |
| 3825 | 278.8018 | -8.24407 | 3.85 |
| 3826 | 278.8025 | 18.20341 | 5.79 |
| 3827 | 278.8767 | 23.60553 | 5.64 |
| 3828 | 279.116  | 9.122491 | 5.38 |
| 3829 | 279.1556 | 33.46904 | 5.42 |
| 3830 | 279.1628 | 6.671805 | 5.44 |
| 3831 | 279.2347 | 38.78369 | 0.03 |
| 3832 | 279.3896 | 62.52659 | 5.74 |
| 3833 | 279.3998 | -0.30947 | 5.77 |
| 3834 | 279.4768 | -21.3977 | 5.94 |
| 3835 | 279.628  | -23.5049 | 5.78 |

|      |          |          |      |
|------|----------|----------|------|
| 3836 | 279.7225 | -21.0519 | 5.86 |
| 3837 | 279.8096 | -47.9098 | 5.85 |
| 3838 | 279.8965 | -43.1859 | 5.43 |
| 3839 | 279.9701 | 52.19608 | 6    |
| 3840 | 280.0016 | -7.7908  | 5.82 |
| 3841 | 280.5684 | -9.05255 | 4.71 |
| 3842 | 280.6581 | 55.53946 | 5.03 |
| 3843 | 280.7589 | -71.4281 | 4.01 |
| 3844 | 280.8802 | -8.27521 | 4.9  |
| 3845 | 280.9056 | -64.5514 | 5.76 |
| 3846 | 280.9456 | -38.3234 | 5.12 |
| 3847 | 280.965  | 31.92661 | 5.68 |
| 3848 | 281.0807 | -35.642  | 4.86 |
| 3849 | 281.2067 | -25.0109 | 5.82 |
| 3850 | 281.2081 | 2.060038 | 5.02 |
| 3851 | 281.2382 | -39.6862 | 5.44 |
| 3852 | 281.3621 | -64.8713 | 4.78 |
| 3853 | 281.3682 | 5.500128 | 5.82 |
| 3854 | 281.4141 | -26.9908 | 3.17 |
| 3855 | 281.4155 | 20.54631 | 4.21 |
| 3856 | 281.4449 | 74.08555 | 5.24 |
| 3857 | 281.5187 | 26.66213 | 4.83 |
| 3858 | 281.5859 | -22.3922 | 5.38 |
| 3859 | 281.5926 | 75.43396 | 5.37 |
| 3860 | 281.6191 | -0.96169 | 5.88 |
| 3861 | 281.6795 | 52.98796 | 5.91 |
| 3862 | 281.6805 | -10.125  | 5.72 |
| 3863 | 281.7553 | 18.18152 | 4.35 |
| 3864 | 281.7936 | -4.74787 | 4.23 |
| 3865 | 281.8706 | -5.70515 | 5.4  |
| 3866 | 281.9359 | -40.4062 | 5.21 |
| 3867 | 282.1579 | -65.0777 | 5.71 |
| 3868 | 282.2104 | -43.68   | 5.46 |
| 3869 | 282.2224 | 19.32872 | 5.9  |
| 3870 | 282.3639 | -45.8101 | 5.8  |
| 3871 | 282.3958 | -43.4341 | 5.6  |
| 3872 | 282.4171 | -20.3247 | 5.22 |
| 3873 | 282.4206 | -5.91286 | 5.98 |
| 3874 | 282.4413 | 32.81282 | 5.93 |
| 3875 | 282.4705 | 32.55106 | 5.23 |
| 3876 | 282.52   | 33.36267 | 3.52 |
| 3877 | 282.7438 | -9.7741  | 5.84 |
| 3878 | 282.8004 | 59.38835 | 4.64 |
| 3879 | 282.8956 | 52.97512 | 5.52 |
| 3880 | 283.0543 | -62.1876 | 4.22 |
| 3881 | 283.0685 | 21.42514 | 5.41 |
| 3882 | 283.1135 | -46.5951 | 5.51 |
| 3883 | 283.1652 | -52.1074 | 5.18 |
| 3884 | 283.3064 | 50.70822 | 4.91 |
| 3885 | 283.4315 | 36.97172 | 5.58 |
| 3886 | 283.5004 | -21.3598 | 5.68 |
| 3887 | 283.5424 | -22.7448 | 4.85 |
| 3888 | 283.5552 | 27.90953 | 5.64 |
| 3889 | 283.5994 | 71.29719 | 4.82 |
| 3890 | 283.6262 | 36.89861 | 4.28 |
| 3891 | 283.6796 | -15.603  | 5.1  |
| 3892 | 283.687  | 22.64508 | 4.59 |
| 3893 | 283.6964 | 48.8594  | 5.84 |
| 3894 | 283.6964 | -87.6058 | 5.28 |

|      |          |          |      |
|------|----------|----------|------|
| 3895 | 283.7174 | 41.60272 | 5.46 |
| 3896 | 283.7798 | -22.6713 | 5    |
| 3897 | 283.8164 | -26.2967 | 2.07 |
| 3898 | 283.8338 | 43.94609 | 4.19 |
| 3899 | 283.8644 | 6.61529  | 5.58 |
| 3900 | 283.8792 | -16.3766 | 5.56 |
| 3901 | 284.0028 | -23.1738 | 5.93 |
| 3902 | 284.0255 | 18.10541 | 5.7  |
| 3903 | 284.0706 | -42.7107 | 5.35 |
| 3904 | 284.1072 | 65.25808 | 5.63 |
| 3905 | 284.1687 | -37.3432 | 5.36 |
| 3906 | 284.1877 | 57.81485 | 5.67 |
| 3907 | 284.2376 | -67.2335 | 4.4  |
| 3908 | 284.2567 | 32.90127 | 5.23 |
| 3909 | 284.2653 | -5.84631 | 4.82 |
| 3910 | 284.3191 | 2.535346 | 5.57 |
| 3911 | 284.3353 | -20.6563 | 5.06 |
| 3912 | 284.4325 | -21.1067 | 3.53 |
| 3913 | 284.5079 | 38.26619 | 5.9  |
| 3914 | 284.5614 | 17.36091 | 5.33 |
| 3915 | 284.6157 | -52.9386 | 4.85 |
| 3916 | 284.6519 | -60.2005 | 5.13 |
| 3917 | 284.6807 | -37.1074 | 4.83 |
| 3918 | 284.6955 | 13.90665 | 5.91 |
| 3919 | 284.7359 | 32.68956 | 3.25 |
| 3920 | 284.7739 | 13.62225 | 5.27 |
| 3921 | 284.8492 | -12.8405 | 5.52 |
| 3922 | 284.9057 | 15.0683  | 4.02 |
| 3923 | 284.9395 | 26.2304  | 5.26 |
| 3924 | 285.0034 | 32.14551 | 4.94 |
| 3925 | 285.0149 | -66.6536 | 5.98 |
| 3926 | 285.057  | 50.53347 | 5.38 |
| 3927 | 285.1811 | 55.6583  | 5.52 |
| 3928 | 285.3223 | 26.29141 | 5.69 |
| 3929 | 285.3599 | 46.93481 | 5.01 |
| 3930 | 285.4201 | -5.73912 | 4.02 |
| 3931 | 285.6153 | -24.8468 | 5.63 |
| 3932 | 285.653  | -29.8801 | 2.61 |
| 3933 | 285.7271 | -3.69899 | 5.41 |
| 3934 | 285.7787 | -42.0951 | 4.74 |
| 3935 | 285.8237 | -38.2531 | 5.72 |
| 3936 | 285.8735 | -68.7555 | 5.87 |
| 3937 | 285.8844 | 1.818768 | 5.83 |
| 3938 | 285.9898 | -51.0186 | 5.93 |
| 3939 | 286.1044 | -31.0471 | 5.5  |
| 3940 | 286.1708 | -21.7415 | 3.77 |
| 3941 | 286.2299 | 53.39665 | 5.41 |
| 3942 | 286.2403 | -4.03142 | 5.4  |
| 3943 | 286.2411 | 31.74407 | 5.62 |
| 3944 | 286.3525 | 13.86348 | 2.99 |
| 3945 | 286.4216 | -15.6604 | 5.94 |
| 3946 | 286.5622 | -4.88255 | 3.44 |
| 3947 | 286.5831 | -52.3409 | 5.18 |
| 3948 | 286.6572 | 28.62859 | 5.53 |
| 3949 | 286.66   | 24.25079 | 5.79 |
| 3950 | 286.7317 | -48.2991 | 5.96 |
| 3951 | 286.735  | -27.6704 | 3.32 |
| 3952 | 286.7442 | 11.07123 | 5.08 |
| 3953 | 286.8255 | 36.10016 | 5.26 |

|      |          |          |      |
|------|----------|----------|------|
| 3954 | 286.8566 | 32.50174 | 5.23 |
| 3955 | 287.0696 | -19.2903 | 5.58 |
| 3956 | 287.0874 | -40.4967 | 4.58 |
| 3957 | 287.1075 | 52.42573 | 5.9  |
| 3958 | 287.2496 | 6.073207 | 5.23 |
| 3959 | 287.2912 | 76.5605  | 5.12 |
| 3960 | 287.3681 | -37.9045 | 4.1  |
| 3961 | 287.441  | -21.0236 | 2.9  |
| 3962 | 287.4703 | -68.4244 | 5.31 |
| 3963 | 287.4902 | -41.8923 | 5.86 |
| 3964 | 287.5073 | -39.3408 | 4.11 |
| 3965 | 287.9191 | 56.85921 | 5.14 |
| 3966 | 287.9417 | 31.28346 | 5.94 |
| 3967 | 288.1388 | 67.66154 | 3.08 |
| 3968 | 288.1696 | -7.93952 | 5.36 |
| 3969 | 288.307  | -25.9068 | 5.77 |
| 3970 | 288.3147 | -12.2826 | 5.5  |
| 3971 | 288.4279 | 2.293708 | 5.15 |
| 3972 | 288.4395 | 39.14597 | 4.41 |
| 3973 | 288.4798 | 57.7051  | 5    |
| 3974 | 288.6648 | -45.1935 | 5.91 |
| 3975 | 288.8223 | 21.23212 | 5.65 |
| 3976 | 288.8337 | 15.08365 | 5.58 |
| 3977 | 288.8536 | 30.52638 | 5.89 |
| 3978 | 288.8851 | -25.2567 | 4.87 |
| 3979 | 288.8877 | 73.35547 | 4.45 |
| 3980 | 289.0543 | 21.39043 | 4.77 |
| 3981 | 289.0906 | -45.466  | 5.38 |
| 3982 | 289.0921 | 38.13373 | 4.34 |
| 3983 | 289.1116 | 14.54462 | 5.68 |
| 3984 | 289.1293 | 4.834796 | 5.58 |
| 3985 | 289.2757 | 53.36846 | 3.8  |
| 3986 | 289.301  | -66.661  | 5.51 |
| 3987 | 289.4087 | -18.9529 | 4.88 |
| 3988 | 289.4318 | 23.02554 | 5.48 |
| 3989 | 289.4542 | 11.59542 | 5.3  |
| 3990 | 289.6354 | 1.085129 | 5.1  |
| 3991 | 289.914  | 12.37468 | 5.53 |
| 3992 | 289.9166 | -35.4215 | 5.59 |
| 3993 | 290.0668 | 57.64513 | 5.92 |
| 3994 | 290.1371 | -5.41577 | 4.99 |
| 3995 | 290.1487 | -0.89216 | 5.47 |
| 3996 | 290.159  | -22.4025 | 5.59 |
| 3997 | 290.1671 | 65.71453 | 4.59 |
| 3998 | 290.4182 | -17.8472 | 3.93 |
| 3999 | 290.4318 | -15.955  | 4.58 |
| 4000 | 290.4621 | -18.3084 | 5.85 |
| 4001 | 290.5898 | -0.25234 | 5.82 |
| 4002 | 290.6596 | -44.459  | 4.01 |
| 4003 | 290.712  | 26.2624  | 5.2  |
| 4004 | 290.7134 | -54.4239 | 5.03 |
| 4005 | 290.8047 | -44.7998 | 4.28 |
| 4006 | 290.9716 | -40.6159 | 3.96 |
| 4007 | 290.9854 | 43.38817 | 5.85 |
| 4008 | 291.0316 | 29.62134 | 4.99 |
| 4009 | 291.2425 | 11.94442 | 5.16 |
| 4010 | 291.2668 | -29.3094 | 5.92 |
| 4011 | 291.3187 | -24.5086 | 5.02 |
| 4012 | 291.34   | -13.8971 | 5.71 |

|      |          |          |      |
|------|----------|----------|------|
| 4013 | 291.3692 | 19.79837 | 5.15 |
| 4014 | 291.3736 | -23.9625 | 5.44 |
| 4015 | 291.3746 | 3.114775 | 3.37 |
| 4016 | 291.538  | 36.3179  | 5.18 |
| 4017 | 291.546  | -15.0533 | 5.72 |
| 4018 | 291.5552 | 20.09773 | 5.6  |
| 4019 | 291.5798 | -21.7767 | 5.57 |
| 4020 | 291.6006 | 13.0238  | 5.76 |
| 4021 | 291.6195 | 19.89149 | 5.83 |
| 4022 | 291.6295 | 0.33857  | 4.68 |
| 4023 | 291.7353 | -29.7432 | 5.65 |
| 4024 | 291.8582 | 52.32044 | 5.73 |
| 4025 | 291.9505 | -54.3253 | 5.69 |
| 4026 | 292.0867 | 2.93003  | 5.85 |
| 4027 | 292.1764 | 24.6649  | 4.44 |
| 4028 | 292.2378 | 24.76872 | 5.82 |
| 4029 | 292.2541 | 1.950448 | 5.79 |
| 4030 | 292.3423 | 14.59602 | 5.57 |
| 4031 | 292.3494 | -43.4452 | 5.71 |
| 4032 | 292.4265 | 51.72978 | 3.77 |
| 4033 | 292.4674 | -26.9856 | 5.49 |
| 4034 | 292.666  | -2.78889 | 5.03 |
| 4035 | 292.7957 | -68.4339 | 5.98 |
| 4036 | 292.8305 | 50.30671 | 5.54 |
| 4037 | 292.8401 | 26.61717 | 5.89 |
| 4038 | 292.943  | 34.45297 | 4.74 |
| 4039 | 293.09   | 69.66118 | 4.67 |
| 4040 | 293.2243 | -53.1856 | 5.75 |
| 4041 | 293.3401 | -45.2717 | 5.59 |
| 4042 | 293.5223 | 7.378941 | 4.45 |
| 4043 | 293.5354 | -40.0346 | 5.91 |
| 4044 | 293.5825 | 51.23662 | 5.72 |
| 4045 | 293.6454 | 19.7734  | 5    |
| 4046 | 293.6719 | 42.41251 | 5.35 |
| 4047 | 293.7122 | 29.46295 | 5.41 |
| 4048 | 293.7802 | -10.5604 | 5.13 |
| 4049 | 293.8041 | -48.0992 | 4.89 |
| 4050 | 294.0069 | -24.7191 | 5.65 |
| 4051 | 294.1106 | 50.2211  | 4.5  |
| 4052 | 294.1582 | 44.69494 | 5.18 |
| 4053 | 294.1768 | -24.8836 | 4.61 |
| 4054 | 294.1803 | -1.2866  | 4.36 |
| 4055 | 294.2186 | 11.27321 | 5.98 |
| 4056 | 294.2227 | -7.02748 | 4.97 |
| 4057 | 294.2639 | -18.2311 | 5.65 |
| 4058 | 294.3225 | 16.4628  | 5.66 |
| 4059 | 294.3934 | -14.3018 | 5.47 |
| 4060 | 294.4472 | -4.64764 | 5.45 |
| 4061 | 294.6716 | 54.97379 | 5.89 |
| 4062 | 294.7985 | 5.397773 | 5.18 |
| 4063 | 294.8442 | 30.15332 | 4.68 |
| 4064 | 294.8604 | 42.81828 | 5.41 |
| 4065 | 295.0241 | 18.01389 | 4.39 |
| 4066 | 295.0299 | -23.4291 | 5.97 |
| 4067 | 295.1805 | -0.62123 | 5.66 |
| 4068 | 295.1808 | -16.2933 | 5.3  |
| 4069 | 295.2091 | 45.52494 | 5.07 |
| 4070 | 295.2622 | 17.47604 | 4.38 |
| 4071 | 295.2731 | 13.81567 | 6    |

|      |          |          |      |
|------|----------|----------|------|
| 4072 | 295.454  | 50.52506 | 5.96 |
| 4073 | 295.6297 | -16.124  | 5.07 |
| 4074 | 295.6417 | 11.82658 | 5.3  |
| 4075 | 295.6859 | 32.42674 | 5.93 |
| 4076 | 295.8897 | -15.4701 | 5.49 |
| 4077 | 295.9289 | 25.77193 | 5.49 |
| 4078 | 295.9379 | 41.77311 | 5.86 |
| 4079 | 296.0692 | 37.35436 | 4.89 |
| 4080 | 296.0767 | 69.33706 | 5.91 |
| 4081 | 296.2437 | 45.13081 | 2.91 |
| 4082 | 296.4164 | 7.613158 | 5.89 |
| 4083 | 296.5051 | -31.9086 | 5.52 |
| 4084 | 296.5649 | 10.61326 | 2.71 |
| 4085 | 296.5906 | -19.7611 | 4.88 |
| 4086 | 296.6067 | 33.7276  | 5    |
| 4087 | 296.8469 | 18.53428 | 3.83 |
| 4088 | 296.8657 | 38.40761 | 5.84 |
| 4089 | 297.005  | -56.3626 | 5.34 |
| 4090 | 297.0431 | 70.26793 | 3.84 |
| 4091 | 297.2444 | 19.14207 | 5.03 |
| 4092 | 297.2592 | -10.8708 | 6    |
| 4093 | 297.3554 | -72.5034 | 5.4  |
| 4094 | 297.5586 | -47.5574 | 5.92 |
| 4095 | 297.6416 | 38.72242 | 5.19 |
| 4096 | 297.6555 | 40.59976 | 5.69 |
| 4097 | 297.6572 | 52.988   | 5.02 |
| 4098 | 297.6867 | -59.1937 | 5.43 |
| 4099 | 297.6949 | -10.7635 | 5.39 |
| 4100 | 297.6958 | 8.868322 | 0.93 |
| 4101 | 297.7568 | 10.41573 | 5.12 |
| 4102 | 297.7671 | 22.61005 | 4.91 |
| 4103 | 297.9609 | -39.8744 | 5.33 |
| 4104 | 297.9961 | 47.02734 | 5.64 |
| 4105 | 298.0066 | 24.99216 | 5.6  |
| 4106 | 298.0299 | 47.93179 | 5.91 |
| 4107 | 298.05   | -19.045  | 5.9  |
| 4108 | 298.1182 | 1.005661 | 3.87 |
| 4109 | 298.1572 | -54.971  | 5.72 |
| 4110 | 298.3224 | 57.52348 | 5.14 |
| 4111 | 298.3281 | -3.11446 | 5.63 |
| 4112 | 298.3654 | 24.07961 | 4.6  |
| 4113 | 298.5345 | -8.57421 | 5.77 |
| 4114 | 298.562  | 8.461453 | 4.72 |
| 4115 | 298.6295 | 24.31938 | 5.57 |
| 4116 | 298.6569 | -8.22729 | 5.69 |
| 4117 | 298.6867 | 0.273628 | 5.63 |
| 4118 | 298.701  | 36.99568 | 5.79 |
| 4119 | 298.8154 | -41.8683 | 4.12 |
| 4120 | 298.8283 | 6.406763 | 3.72 |
| 4121 | 298.9074 | 52.43895 | 4.91 |
| 4122 | 298.9598 | -26.2995 | 4.7  |
| 4123 | 298.9657 | 38.48671 | 4.95 |
| 4124 | 298.9807 | 58.84597 | 4.97 |
| 4125 | 299.0053 | 16.6348  | 5.71 |
| 4126 | 299.0594 | 11.42372 | 5.29 |
| 4127 | 299.0765 | 35.08342 | 3.9  |
| 4128 | 299.2368 | -27.1699 | 4.53 |
| 4129 | 299.2763 | -58.9014 | 5.25 |
| 4130 | 299.3078 | 40.36782 | 5.46 |

|      |          |          |      |
|------|----------|----------|------|
| 4131 | 299.4394 | 16.78916 | 5.54 |
| 4132 | 299.4876 | -15.4915 | 5.01 |
| 4133 | 299.6583 | 30.98367 | 5.51 |
| 4134 | 299.672  | -69.164  | 5.73 |
| 4135 | 299.6893 | 19.49215 | 3.51 |
| 4136 | 299.7383 | -26.1958 | 4.85 |
| 4137 | 299.7939 | 23.10128 | 5.68 |
| 4138 | 299.8351 | 45.77254 | 5.93 |
| 4139 | 299.9341 | -35.2763 | 4.37 |
| 4140 | 299.9473 | -9.95823 | 5.86 |
| 4141 | 299.964  | -34.6978 | 5.31 |
| 4142 | 299.98   | 37.04289 | 5.15 |
| 4143 | 300.0138 | 17.51651 | 5.39 |
| 4144 | 300.0664 | -37.7017 | 5.95 |
| 4145 | 300.0844 | -33.7035 | 5.65 |
| 4146 | 300.0963 | -66.9494 | 5.76 |
| 4147 | 300.1481 | -72.9105 | 3.95 |
| 4148 | 300.2014 | -45.1129 | 5.8  |
| 4149 | 300.2457 | 8.557735 | 5.9  |
| 4150 | 300.2752 | 27.75357 | 4.66 |
| 4151 | 300.3398 | 50.1047  | 5.06 |
| 4152 | 300.3689 | 64.82097 | 5.23 |
| 4153 | 300.4363 | 24.80042 | 5.88 |
| 4154 | 300.4364 | -59.3759 | 5.05 |
| 4155 | 300.4686 | -66.944  | 5.33 |
| 4156 | 300.4942 | -13.6372 | 5.7  |
| 4157 | 300.506  | 24.93804 | 5.26 |
| 4158 | 300.6645 | -27.7098 | 4.49 |
| 4159 | 300.7045 | 67.87357 | 4.51 |
| 4160 | 300.8183 | 18.50099 | 5.98 |
| 4161 | 300.8751 | 16.03125 | 5.67 |
| 4162 | 300.8894 | -37.9407 | 4.76 |
| 4163 | 300.9059 | 29.89681 | 5.73 |
| 4164 | 301.0259 | 17.07017 | 5.79 |
| 4165 | 301.0346 | 7.277966 | 5.52 |
| 4166 | 301.0816 | -32.0563 | 4.99 |
| 4167 | 301.0965 | -0.70931 | 5.68 |
| 4168 | 301.1507 | 32.2186  | 5.65 |
| 4169 | 301.2896 | 19.99107 | 5.09 |
| 4170 | 301.387  | 61.99542 | 5.41 |
| 4171 | 301.5577 | 53.16569 | 5.82 |
| 4172 | 301.5907 | 35.97247 | 5.39 |
| 4173 | 301.7225 | 23.61443 | 5.08 |
| 4174 | 301.8465 | -52.8808 | 4.92 |
| 4175 | 302.0076 | -0.67819 | 5.97 |
| 4176 | 302.1817 | -66.1821 | 3.55 |
| 4177 | 302.2223 | 77.71142 | 4.4  |
| 4178 | 302.3567 | 36.83962 | 4.94 |
| 4179 | 302.6397 | 26.90417 | 5.52 |
| 4180 | 302.7997 | -36.1012 | 5.32 |
| 4181 | 302.8262 | -0.82146 | 3.25 |
| 4182 | 302.8955 | 62.07854 | 5.71 |
| 4183 | 302.9499 | 26.80899 | 5.49 |
| 4184 | 303.0029 | 26.47881 | 5.91 |
| 4185 | 303.1078 | -12.6175 | 5.84 |
| 4186 | 303.3078 | -1.00934 | 5.46 |
| 4187 | 303.3252 | 46.81568 | 4.83 |
| 4188 | 303.3494 | 56.56772 | 4.28 |
| 4189 | 303.3651 | 60.64057 | 5.8  |

|      |          |          |      |
|------|----------|----------|------|
| 4190 | 303.4079 | 46.74133 | 3.81 |
| 4191 | 303.5605 | 28.69482 | 5.2  |
| 4192 | 303.5692 | 15.19761 | 4.95 |
| 4193 | 303.5793 | -52.4458 | 5.64 |
| 4194 | 303.6335 | 36.8063  | 4.95 |
| 4195 | 303.8162 | 25.59196 | 4.77 |
| 4196 | 303.8225 | -27.033  | 5.73 |
| 4197 | 303.849  | 33.72908 | 5.71 |
| 4198 | 303.868  | 47.71421 | 4    |
| 4199 | 303.876  | 23.50891 | 5.18 |
| 4200 | 303.9422 | 27.81425 | 4.52 |
| 4201 | 304.0026 | 45.57953 | 5.87 |
| 4202 | 304.1962 | 24.6711  | 5.3  |
| 4203 | 304.2304 | 40.36508 | 5.25 |
| 4204 | 304.3805 | 66.85369 | 5.92 |
| 4205 | 304.412  | -12.5082 | 4.24 |
| 4206 | 304.4467 | 38.03293 | 4.79 |
| 4207 | 304.5058 | -21.81   | 5.86 |
| 4208 | 304.5136 | -12.5449 | 3.58 |
| 4209 | 304.5291 | 40.73208 | 5.84 |
| 4210 | 304.6031 | 55.39709 | 5.76 |
| 4211 | 304.6194 | 36.9998  | 5.58 |
| 4212 | 304.6628 | 34.98278 | 5.18 |
| 4213 | 304.8484 | -19.1185 | 5.27 |
| 4214 | 304.903  | 62.25747 | 5.72 |
| 4215 | 305.0008 | 13.54809 | 5.96 |
| 4216 | 305.0251 | 68.88032 | 5.68 |
| 4217 | 305.0892 | 17.79293 | 5.82 |
| 4218 | 305.1659 | -12.7591 | 4.76 |
| 4219 | 305.2528 | -14.7814 | 3.09 |
| 4220 | 305.298  | 63.98012 | 5.69 |
| 4221 | 305.5143 | 24.4461  | 5.53 |
| 4222 | 305.5224 | 45.79499 | 5.58 |
| 4223 | 305.5571 | 40.25668 | 2.23 |
| 4224 | 305.6146 | -42.0495 | 5.58 |
| 4225 | 305.6887 | 41.02601 | 5.94 |
| 4226 | 305.7946 | 5.342987 | 5.3  |
| 4227 | 305.9349 | 37.47645 | 5.87 |
| 4228 | 305.9651 | 32.19017 | 4.43 |
| 4229 | 305.9716 | -42.4229 | 5.64 |
| 4230 | 306.3618 | -28.6633 | 5.85 |
| 4231 | 306.4119 | -56.7351 | 1.92 |
| 4232 | 306.4189 | 21.40964 | 5.69 |
| 4233 | 306.7594 | 49.38337 | 5.73 |
| 4234 | 306.83   | -18.2117 | 5.25 |
| 4235 | 306.8927 | 38.44033 | 5.64 |
| 4236 | 307.0608 | 81.42271 | 5.37 |
| 4237 | 307.2151 | -17.8137 | 4.8  |
| 4238 | 307.335  | 36.45473 | 5.91 |
| 4239 | 307.3489 | 30.36856 | 4.01 |
| 4240 | 307.363  | 56.06819 | 5.9  |
| 4241 | 307.3649 | 81.09128 | 5.97 |
| 4242 | 307.3954 | 62.99411 | 4.21 |
| 4243 | 307.4125 | -2.88553 | 4.91 |
| 4244 | 307.4746 | -18.5832 | 5.91 |
| 4245 | 307.5148 | 48.95157 | 4.95 |
| 4246 | 307.8284 | 49.2203  | 5.45 |
| 4247 | 307.8767 | 74.95462 | 5.19 |
| 4248 | 308.0987 | -9.85338 | 5.66 |

|      |          |          |      |
|------|----------|----------|------|
| 4249 | 308.3032 | 11.30326 | 4.04 |
| 4250 | 308.3235 | -80.9649 | 5.77 |
| 4251 | 308.4758 | 35.25085 | 4.65 |
| 4252 | 308.4785 | 46.69387 | 5.78 |
| 4253 | 308.4795 | -44.516  | 5.12 |
| 4254 | 308.4877 | 13.02725 | 5.39 |
| 4255 | 308.8272 | 14.67421 | 4.66 |
| 4256 | 308.8952 | -60.5817 | 4.76 |
| 4257 | 309.1818 | -2.54996 | 4.89 |
| 4258 | 309.2695 | 26.46195 | 5.6  |
| 4259 | 309.3873 | 14.59509 | 3.63 |
| 4260 | 309.3918 | -47.2915 | 3.11 |
| 4261 | 309.3971 | -61.5299 | 4.86 |
| 4262 | 309.4547 | 11.37768 | 5.43 |
| 4263 | 309.5775 | -81.2891 | 5.92 |
| 4264 | 309.5845 | -1.10512 | 4.31 |
| 4265 | 309.6306 | 21.20117 | 4.81 |
| 4266 | 309.633  | 24.11596 | 5.06 |
| 4267 | 309.6458 | 23.68049 | 5.94 |
| 4268 | 309.6833 | 13.31512 | 5.69 |
| 4269 | 309.748  | 30.33427 | 5.68 |
| 4270 | 309.7707 | 15.8382  | 5.98 |
| 4271 | 309.7824 | 10.0862  | 5.07 |
| 4272 | 309.818  | -14.9548 | 5.26 |
| 4273 | 309.8537 | 0.486445 | 5.15 |
| 4274 | 309.9095 | 15.91208 | 3.78 |
| 4275 | 310.011  | -60.5489 | 5.12 |
| 4276 | 310.0123 | -18.1387 | 5.15 |
| 4277 | 310.0132 | 43.45888 | 5.98 |
| 4278 | 310.0826 | -33.4318 | 5.47 |
| 4279 | 310.1355 | -16.1242 | 5.79 |
| 4280 | 310.2606 | 32.30729 | 5.51 |
| 4281 | 310.3486 | -31.5983 | 5.76 |
| 4282 | 310.358  | 45.28034 | 1.33 |
| 4283 | 310.4854 | 41.71687 | 5.68 |
| 4284 | 310.4878 | -66.7607 | 5.15 |
| 4285 | 310.5124 | -76.1806 | 5.99 |
| 4286 | 310.5526 | 50.34003 | 5.41 |
| 4287 | 310.6468 | 82.53116 | 5.75 |
| 4288 | 310.7959 | 66.65745 | 5.59 |
| 4289 | 310.8647 | 15.07458 | 4.43 |
| 4290 | 311.0097 | -51.921  | 4.52 |
| 4291 | 311.0919 | 56.4884  | 5.94 |
| 4292 | 311.2188 | 25.27062 | 4.92 |
| 4293 | 311.2396 | -66.2032 | 3.42 |
| 4294 | 311.3224 | 61.83878 | 3.42 |
| 4295 | 311.338  | 57.57973 | 4.52 |
| 4296 | 311.4156 | 30.71972 | 4.23 |
| 4297 | 311.5239 | -25.2709 | 4.15 |
| 4298 | 311.5416 | -21.514  | 5.91 |
| 4299 | 311.5528 | 33.97026 | 2.49 |
| 4300 | 311.5836 | -39.1993 | 5.48 |
| 4301 | 311.7948 | 34.37412 | 4.93 |
| 4302 | 311.8522 | 36.49072 | 4.57 |
| 4303 | 311.8894 | 80.55226 | 5.36 |
| 4304 | 311.919  | -9.49578 | 3.77 |
| 4305 | 311.9343 | -5.0277  | 4.46 |
| 4306 | 311.9514 | 6.008209 | 5.62 |
| 4307 | 311.9554 | 47.83187 | 5.6  |

|      |          |          |      |
|------|----------|----------|------|
| 4308 | 312.1214 | -43.9885 | 5.11 |
| 4309 | 312.2345 | 46.11413 | 4.86 |
| 4310 | 312.3234 | -25.7812 | 5.86 |
| 4311 | 312.3257 | -68.7765 | 5.41 |
| 4312 | 312.3707 | -46.2268 | 4.89 |
| 4313 | 312.492  | -33.7797 | 4.9  |
| 4314 | 312.5205 | 44.0593  | 5.07 |
| 4315 | 312.6741 | -12.5449 | 5.87 |
| 4316 | 312.7532 | -37.9133 | 5.51 |
| 4317 | 312.8677 | 28.25051 | 5.61 |
| 4318 | 312.8752 | -51.6082 | 5.06 |
| 4319 | 312.9554 | -26.9191 | 4.11 |
| 4320 | 313.032  | 27.09698 | 4.57 |
| 4321 | 313.0362 | -5.50706 | 5.55 |
| 4322 | 313.1635 | -8.98332 | 4.72 |
| 4323 | 313.3115 | 44.38726 | 4.79 |
| 4324 | 313.3274 | 45.18167 | 5.46 |
| 4325 | 313.4174 | -39.8099 | 5.34 |
| 4326 | 313.4746 | 33.43789 | 5.47 |
| 4327 | 313.6402 | 28.05762 | 5    |
| 4328 | 313.6848 | 75.92557 | 6    |
| 4329 | 313.6992 | -17.9229 | 5.78 |
| 4330 | 313.7025 | -58.4542 | 3.65 |
| 4331 | 313.9029 | 13.72154 | 5.19 |
| 4332 | 313.9107 | 12.56856 | 5.54 |
| 4333 | 313.9575 | 47.41766 | 5.72 |
| 4334 | 314.1062 | 50.7286  | 5.84 |
| 4335 | 314.1079 | 49.19585 | 5.92 |
| 4336 | 314.1449 | 44.92472 | 5.97 |
| 4337 | 314.1972 | -26.2964 | 5.7  |
| 4338 | 314.2251 | -9.69754 | 5.48 |
| 4339 | 314.2934 | 41.16714 | 3.94 |
| 4340 | 314.4194 | -16.0315 | 5.88 |
| 4341 | 314.5681 | 22.32591 | 5.29 |
| 4342 | 314.5811 | 44.47171 | 5.56 |
| 4343 | 314.6081 | 10.83929 | 5.52 |
| 4344 | 314.6251 | 50.46179 | 5.59 |
| 4345 | 314.6743 | -14.4831 | 5.96 |
| 4346 | 314.7684 | 4.293551 | 5.4  |
| 4347 | 314.8558 | 59.43859 | 5.53 |
| 4348 | 314.9565 | 47.52095 | 4.76 |
| 4349 | 315.0166 | 7.516197 | 5.99 |
| 4350 | 315.0895 | -51.2653 | 5.77 |
| 4351 | 315.1154 | 19.32958 | 5.71 |
| 4352 | 315.2955 | 46.15577 | 5.43 |
| 4353 | 315.3036 | 36.02601 | 6    |
| 4354 | 315.3228 | -32.2578 | 4.67 |
| 4355 | 315.5375 | 56.66961 | 5.83 |
| 4356 | 315.6132 | -38.531  | 5.95 |
| 4357 | 315.7415 | -38.6314 | 5.33 |
| 4358 | 315.9484 | 53.2859  | 5.92 |
| 4359 | 316.0197 | -5.82307 | 5.74 |
| 4360 | 316.1013 | -19.855  | 4.85 |
| 4361 | 316.1444 | 5.502862 | 5.61 |
| 4362 | 316.1794 | -77.0238 | 5.13 |
| 4363 | 316.2328 | 43.92785 | 3.71 |
| 4364 | 316.3094 | -54.727  | 5.17 |
| 4365 | 316.3613 | 5.958199 | 5.96 |
| 4366 | 316.3719 | 78.12639 | 5.92 |

|      |          |          |      |
|------|----------|----------|------|
| 4367 | 316.4868 | -17.2329 | 4.08 |
| 4368 | 316.5048 | -30.1251 | 5.7  |
| 4369 | 316.5971 | 71.4318  | 5.88 |
| 4370 | 316.6028 | -32.3416 | 5.2  |
| 4371 | 316.6063 | -41.386  | 5.52 |
| 4372 | 316.626  | 31.18466 | 5.77 |
| 4373 | 316.6504 | 47.6484  | 4.53 |
| 4374 | 316.7248 | 38.74942 | 5.2  |
| 4375 | 316.7819 | -25.0059 | 4.52 |
| 4376 | 317.1362 | -63.9283 | 5.76 |
| 4377 | 317.1401 | -21.1937 | 5.3  |
| 4378 | 317.162  | 30.20564 | 5.7  |
| 4379 | 317.1952 | -88.9565 | 5.45 |
| 4380 | 317.3435 | -73.173  | 5.67 |
| 4381 | 317.3985 | -11.3717 | 4.51 |
| 4382 | 317.5649 | 53.5631  | 5.75 |
| 4383 | 317.5854 | 10.13158 | 4.71 |
| 4384 | 317.951  | 59.98661 | 5.73 |
| 4385 | 318.0571 | -40.2694 | 5.83 |
| 4386 | 318.2341 | 30.22692 | 3.2  |
| 4387 | 318.2628 | -39.4249 | 5.26 |
| 4388 | 318.3222 | -27.6193 | 5.41 |
| 4389 | 318.329  | -36.4235 | 5.96 |
| 4390 | 318.3355 | -70.1263 | 5.08 |
| 4391 | 318.6201 | 10.00696 | 4.5  |
| 4392 | 318.6979 | 38.04532 | 3.74 |
| 4393 | 318.9079 | -20.6517 | 5.16 |
| 4394 | 318.9269 | 77.0123  | 5.91 |
| 4395 | 318.9368 | -15.1715 | 5.33 |
| 4396 | 318.9411 | -53.2631 | 5.74 |
| 4397 | 318.956  | 5.247845 | 3.94 |
| 4398 | 319.3094 | 55.798   | 5.98 |
| 4399 | 319.354  | 39.39468 | 4.26 |
| 4400 | 319.4795 | 34.8969  | 4.42 |
| 4401 | 319.4845 | -32.1725 | 4.72 |
| 4402 | 319.4887 | -17.9851 | 5.4  |
| 4403 | 319.5461 | -4.51948 | 5.83 |
| 4404 | 319.6133 | 43.94594 | 5.05 |
| 4405 | 319.6449 | 62.58557 | 2.47 |
| 4406 | 319.7168 | 11.20337 | 5.97 |
| 4407 | 319.8154 | 58.6235  | 5.71 |
| 4408 | 319.8424 | 38.23747 | 5.89 |
| 4409 | 319.8426 | 64.87186 | 5.19 |
| 4410 | 319.8698 | 49.51029 | 5.75 |
| 4411 | 319.9666 | -53.4494 | 4.5  |
| 4412 | 320.1902 | -40.8095 | 4.81 |
| 4413 | 320.268  | -4.56013 | 5.86 |
| 4414 | 320.2683 | 23.85597 | 5.59 |
| 4415 | 320.2701 | 7.354503 | 5.82 |
| 4416 | 320.5017 | 49.38885 | 5.68 |
| 4417 | 320.5217 | 19.80451 | 4.09 |
| 4418 | 320.5617 | -16.8345 | 4.29 |
| 4419 | 320.7234 | 6.811141 | 5.16 |
| 4420 | 320.7344 | -9.31933 | 5.98 |
| 4421 | 320.7521 | -22.669  | 5.62 |
| 4422 | 320.9951 | 24.27414 | 5.7  |
| 4423 | 321.04   | -20.8519 | 5.37 |
| 4424 | 321.0479 | -12.8781 | 5.49 |
| 4425 | 321.1034 | -41.0067 | 5.78 |

|      |          |          |      |
|------|----------|----------|------|
| 4426 | 321.1417 | 26.17456 | 5.67 |
| 4427 | 321.2065 | 80.52483 | 5.96 |
| 4428 | 321.3043 | -9.74855 | 5.72 |
| 4429 | 321.3207 | -3.55675 | 5.48 |
| 4430 | 321.3315 | 46.71434 | 5.6  |
| 4431 | 321.4459 | 36.66739 | 5.92 |
| 4432 | 321.5953 | -37.8294 | 5.64 |
| 4433 | 321.6109 | -65.3662 | 4.23 |
| 4434 | 321.6668 | -22.4113 | 3.75 |
| 4435 | 321.6874 | 52.89854 | 6    |
| 4436 | 321.7151 | 48.83517 | 5.29 |
| 4437 | 321.7568 | -42.5479 | 5.5  |
| 4438 | 321.8117 | -21.1962 | 5.77 |
| 4439 | 321.839  | 37.1168  | 5.3  |
| 4440 | 321.9169 | 27.60859 | 5.39 |
| 4441 | 321.9423 | 66.8091  | 5.42 |
| 4442 | 322.0344 | 32.22533 | 5.75 |
| 4443 | 322.165  | 70.56072 | 3.23 |
| 4444 | 322.1808 | -21.8072 | 4.51 |
| 4445 | 322.1872 | -69.5054 | 5.61 |
| 4446 | 322.2491 | 22.17944 | 5.94 |
| 4447 | 322.3623 | 46.54058 | 5.23 |
| 4448 | 322.4871 | 23.63884 | 4.52 |
| 4449 | 322.747  | 60.45943 | 5.54 |
| 4450 | 322.8897 | -5.57117 | 2.89 |
| 4451 | 323.0245 | -41.1793 | 5.29 |
| 4452 | 323.0607 | -33.9446 | 5.97 |
| 4453 | 323.2358 | 49.97763 | 5.77 |
| 4454 | 323.348  | -44.8487 | 5.57 |
| 4455 | 323.4952 | 45.59184 | 3.99 |
| 4456 | 323.694  | 38.53405 | 4.87 |
| 4457 | 323.7127 | -20.0843 | 5.7  |
| 4458 | 323.8234 | -3.9833  | 5.78 |
| 4459 | 324.0457 | -26.1715 | 5.74 |
| 4460 | 324.2374 | 40.41352 | 5.05 |
| 4461 | 324.2701 | -19.466  | 4.52 |
| 4462 | 324.438  | -7.8542  | 4.69 |
| 4463 | 324.4393 | 19.31861 | 5.46 |
| 4464 | 324.4801 | 62.08194 | 4.79 |
| 4465 | 324.6331 | 5.771743 | 5.67 |
| 4466 | 324.7401 | 57.48904 | 5.7  |
| 4467 | 324.755  | 20.26545 | 5.78 |
| 4468 | 324.8886 | 2.243558 | 5.1  |
| 4469 | 325.0227 | -16.6623 | 3.68 |
| 4470 | 325.0463 | 43.27384 | 5.1  |
| 4471 | 325.3694 | -77.39   | 3.74 |
| 4472 | 325.3869 | -14.0476 | 5.16 |
| 4473 | 325.4804 | 71.31142 | 4.54 |
| 4474 | 325.5029 | -23.2629 | 5.24 |
| 4475 | 325.5045 | 35.5102  | 5.98 |
| 4476 | 325.5236 | 51.18962 | 4.68 |
| 4477 | 325.5421 | 1.285253 | 5.65 |
| 4478 | 325.5644 | 5.680138 | 5.31 |
| 4479 | 325.5957 | 41.07701 | 5.73 |
| 4480 | 325.6646 | -18.8663 | 4.73 |
| 4481 | 325.7668 | 72.32008 | 5.18 |
| 4482 | 325.7683 | -14.3997 | 5.89 |
| 4483 | 325.777  | 41.15497 | 5.52 |
| 4484 | 325.8569 | 38.28359 | 5.7  |

|      |          |          |      |
|------|----------|----------|------|
| 4485 | 325.8769 | 58.78005 | 4.02 |
| 4486 | 326.004  | -14.7494 | 5.96 |
| 4487 | 326.0357 | 28.74263 | 4.77 |
| 4488 | 326.0465 | 9.875011 | 2.39 |
| 4489 | 326.1279 | 17.35002 | 4.34 |
| 4490 | 326.1305 | 14.77194 | 5.96 |
| 4491 | 326.1614 | 25.64503 | 4.15 |
| 4492 | 326.222  | 62.46057 | 5.96 |
| 4493 | 326.2367 | -33.0258 | 4.34 |
| 4494 | 326.2511 | -9.08243 | 5.08 |
| 4495 | 326.3622 | 61.12081 | 4.31 |
| 4496 | 326.5182 | 22.94888 | 5.27 |
| 4497 | 326.6337 | -11.366  | 5.58 |
| 4498 | 326.6984 | 49.30957 | 4.25 |
| 4499 | 326.7602 | -16.1273 | 2.85 |
| 4500 | 326.8082 | 2.686124 | 5.64 |
| 4501 | 326.8554 | 60.69269 | 5.52 |
| 4502 | 326.934  | -30.8983 | 5.02 |
| 4503 | 327.0656 | -47.3036 | 5.57 |
| 4504 | 327.4612 | 30.17422 | 5.08 |
| 4505 | 327.5005 | -64.7125 | 5.62 |
| 4506 | 327.5363 | 17.28589 | 5.34 |
| 4507 | 327.6966 | -69.6294 | 5.51 |
| 4508 | 327.7273 | -82.7189 | 5.29 |
| 4509 | 327.8927 | 19.82668 | 5.78 |
| 4510 | 328.0043 | 55.79674 | 5.69 |
| 4511 | 328.1247 | 28.79354 | 5.53 |
| 4512 | 328.2657 | 25.92514 | 5.09 |
| 4513 | 328.324  | -13.5518 | 5.09 |
| 4514 | 328.4058 | 19.66844 | 5.68 |
| 4515 | 328.4822 | -37.3649 | 3.01 |
| 4516 | 328.5432 | -4.27618 | 5.71 |
| 4517 | 328.7215 | 56.61123 | 5.8  |
| 4518 | 328.7975 | -61.8866 | 5.92 |
| 4519 | 328.8792 | 65.32081 | 5.95 |
| 4520 | 329.0949 | -37.2537 | 5.46 |
| 4521 | 329.1631 | 63.62556 | 5.17 |
| 4522 | 329.2349 | 12.07649 | 5.55 |
| 4523 | 329.4795 | -54.9926 | 4.41 |
| 4524 | 329.723  | 62.69799 | 6    |
| 4525 | 329.8124 | 73.1799  | 5.04 |
| 4526 | 329.8246 | -38.3951 | 5.5  |
| 4527 | 330.033  | 6.717438 | 6    |
| 4528 | 330.2093 | -28.4537 | 5.43 |
| 4529 | 330.2709 | 0.604715 | 5.6  |
| 4530 | 330.2723 | 13.11982 | 5.61 |
| 4531 | 330.2885 | 8.257164 | 5.64 |
| 4532 | 330.4608 | 52.88225 | 5.78 |
| 4533 | 330.5191 | 58.00037 | 5.55 |
| 4534 | 330.7361 | 44.64986 | 5.6  |
| 4535 | 330.7659 | -76.1184 | 5.94 |
| 4536 | 330.8186 | -6.52241 | 5.55 |
| 4537 | 330.8285 | -2.15536 | 4.75 |
| 4538 | 330.8293 | 11.38655 | 5.83 |
| 4539 | 330.8402 | -56.786  | 4.72 |
| 4540 | 330.9477 | 64.62797 | 4.4  |
| 4541 | 330.9707 | 63.11992 | 5.29 |
| 4542 | 331.1532 | -26.8224 | 5.96 |
| 4543 | 331.1976 | -0.90634 | 5.28 |

|      |          |          |      |
|------|----------|----------|------|
| 4544 | 331.2521 | 62.78567 | 5.26 |
| 4545 | 331.2866 | 62.27981 | 5.12 |
| 4546 | 331.2972 | 26.67369 | 5.75 |
| 4547 | 331.3945 | 28.96398 | 5.69 |
| 4548 | 331.4198 | 5.058531 | 4.85 |
| 4549 | 331.446  | -0.31985 | 2.94 |
| 4550 | 331.4626 | -59.6361 | 5.62 |
| 4551 | 331.5081 | 45.01435 | 5.09 |
| 4552 | 331.5287 | -39.5434 | 4.46 |
| 4553 | 331.6093 | -13.8697 | 4.29 |
| 4554 | 331.7528 | 25.34511 | 3.77 |
| 4555 | 331.8691 | 19.47553 | 5.74 |
| 4556 | 331.9596 | 21.70293 | 5.79 |
| 4557 | 332.0583 | -46.961  | 1.77 |
| 4558 | 332.0959 | -32.9885 | 4.5  |
| 4559 | 332.1081 | -34.0438 | 4.97 |
| 4560 | 332.2458 | -18.5196 | 5.8  |
| 4561 | 332.3068 | 33.17234 | 5.59 |
| 4562 | 332.4518 | 72.34121 | 4.8  |
| 4563 | 332.4821 | -34.015  | 5.38 |
| 4564 | 332.4969 | 33.17822 | 4.29 |
| 4565 | 332.5366 | -32.5484 | 4.94 |
| 4566 | 332.5499 | 6.197865 | 3.53 |
| 4567 | 332.6406 | -4.26686 | 5.97 |
| 4568 | 332.656  | 11.62454 | 5.78 |
| 4569 | 332.6562 | -11.5649 | 5.44 |
| 4570 | 332.6616 | 70.13257 | 5.52 |
| 4571 | 332.7137 | 58.20126 | 3.34 |
| 4572 | 332.7912 | 50.82339 | 5.39 |
| 4573 | 332.8774 | 59.41449 | 5.09 |
| 4574 | 332.9532 | 56.83936 | 5.26 |
| 4575 | 332.9639 | 16.04055 | 5.93 |
| 4576 | 333.0084 | 60.7591  | 5.36 |
| 4577 | 333.0337 | 24.95064 | 5.94 |
| 4578 | 333.0935 | 63.29104 | 5.79 |
| 4579 | 333.1993 | 34.60459 | 5.35 |
| 4580 | 333.2942 | 86.10795 | 5.27 |
| 4581 | 333.4112 | 28.60802 | 5.87 |
| 4582 | 333.4351 | -25.1809 | 5.58 |
| 4583 | 333.4552 | 45.44061 | 5.53 |
| 4584 | 333.4697 | 39.71493 | 4.5  |
| 4585 | 333.5751 | -21.0746 | 5.32 |
| 4586 | 333.5781 | -27.7669 | 5.44 |
| 4587 | 333.6849 | 42.95391 | 5.72 |
| 4588 | 333.7591 | 57.04359 | 4.18 |
| 4589 | 333.9038 | -41.3467 | 4.81 |
| 4590 | 333.9924 | 37.74874 | 4.12 |
| 4591 | 334.1107 | -41.6272 | 5.11 |
| 4592 | 334.1107 | 57.22024 | 5.88 |
| 4593 | 334.2002 | -12.8314 | 5.34 |
| 4594 | 334.2085 | -7.78329 | 4.17 |
| 4595 | 334.219  | -9.04007 | 5.79 |
| 4596 | 334.2771 | -5.38716 | 5.75 |
| 4597 | 334.4608 | -77.5116 | 5.48 |
| 4598 | 334.5527 | 62.80439 | 5.74 |
| 4599 | 334.5651 | -53.6271 | 5.4  |
| 4600 | 334.6254 | -60.2596 | 2.86 |
| 4601 | 334.7531 | -13.305  | 5.97 |
| 4602 | 335.007  | -80.4397 | 5.18 |

|      |          |          |      |
|------|----------|----------|------|
| 4603 | 335.0497 | -7.8211  | 5.35 |
| 4604 | 335.1149 | 5.789498 | 5.38 |
| 4605 | 335.2564 | 46.53657 | 4.56 |
| 4606 | 335.3306 | 28.33053 | 4.81 |
| 4607 | 335.3795 | 12.20519 | 4.82 |
| 4608 | 335.3982 | -21.5982 | 5.13 |
| 4609 | 335.4141 | -1.38733 | 3.85 |
| 4610 | 335.7833 | -45.9285 | 5.63 |
| 4611 | 335.8785 | -24.7627 | 5.53 |
| 4612 | 335.884  | -7.19442 | 5.92 |
| 4613 | 335.8901 | 52.22905 | 4.43 |
| 4614 | 336.0287 | -4.83701 | 5.79 |
| 4615 | 336.1128 | -13.5294 | 5.77 |
| 4616 | 336.1291 | 49.47639 | 4.6  |
| 4617 | 336.1537 | -72.2554 | 5.29 |
| 4618 | 336.235  | -57.7974 | 5.32 |
| 4619 | 336.2942 | -70.4316 | 5.78 |
| 4620 | 336.3193 | 1.377401 | 4.81 |
| 4621 | 336.5034 | 70.7709  | 5.47 |
| 4622 | 336.6429 | -16.7417 | 5.55 |
| 4623 | 336.6558 | 4.393766 | 5.77 |
| 4624 | 336.6767 | 78.78585 | 5.84 |
| 4625 | 336.7721 | 65.13227 | 5.53 |
| 4626 | 336.8332 | -64.9664 | 4.5  |
| 4627 | 336.9427 | 31.84004 | 5.99 |
| 4628 | 336.9647 | 4.695664 | 4.8  |
| 4629 | 337.157  | -67.4891 | 5.57 |
| 4630 | 337.1634 | -39.1318 | 5.47 |
| 4631 | 337.2833 | 9.129034 | 5.58 |
| 4632 | 337.2926 | 26.7632  | 5.77 |
| 4633 | 337.2928 | 58.4152  | 4.07 |
| 4634 | 337.3174 | -43.4956 | 3.96 |
| 4635 | 337.3826 | 47.70689 | 4.35 |
| 4636 | 337.4393 | -43.7492 | 4.15 |
| 4637 | 337.4417 | -27.1073 | 5.94 |
| 4638 | 337.4707 | 78.82428 | 5.45 |
| 4639 | 337.4914 | 4.43169  | 5.51 |
| 4640 | 337.5076 | 32.57264 | 5.63 |
| 4641 | 337.6219 | 43.12338 | 4.53 |
| 4642 | 337.6617 | -10.678  | 4.83 |
| 4643 | 337.8229 | 50.28249 | 3.78 |
| 4644 | 337.8764 | -32.3461 | 4.29 |
| 4645 | 337.9063 | -85.9673 | 5.76 |
| 4646 | 338.0676 | 76.22644 | 5.7  |
| 4647 | 338.1099 | 39.77973 | 5.89 |
| 4648 | 338.2503 | -61.9821 | 4.95 |
| 4649 | 338.4194 | 56.62474 | 5.73 |
| 4650 | 338.5121 | -1.57427 | 5.88 |
| 4651 | 338.6735 | -20.7082 | 5.21 |
| 4652 | 338.8391 | -0.1175  | 4.04 |
| 4653 | 338.9016 | -23.9911 | 5.97 |
| 4654 | 338.9422 | 73.64319 | 5.08 |
| 4655 | 338.9679 | 39.63433 | 5.71 |
| 4656 | 339.1477 | -31.6638 | 5.82 |
| 4657 | 339.2452 | -40.591  | 5.88 |
| 4658 | 339.304  | 75.37181 | 5.79 |
| 4659 | 339.3434 | 51.54512 | 4.65 |
| 4660 | 339.4391 | -4.22806 | 5.03 |
| 4661 | 339.658  | 56.79563 | 5.18 |

|      |          |          |      |
|------|----------|----------|------|
| 4662 | 339.6627 | 63.58447 | 5.2  |
| 4663 | 339.7144 | -33.0813 | 5.67 |
| 4664 | 339.7191 | 19.52226 | 5.84 |
| 4665 | 339.8153 | 39.05027 | 4.89 |
| 4666 | 340.0767 | 53.84593 | 5.93 |
| 4667 | 340.0929 | -30.6589 | 5.88 |
| 4668 | 340.1286 | 44.27631 | 4.5  |
| 4669 | 340.1639 | -27.0436 | 4.19 |
| 4670 | 340.2038 | -57.4223 | 5.97 |
| 4671 | 340.2195 | 14.54916 | 5.74 |
| 4672 | 340.3655 | 10.83136 | 3.42 |
| 4673 | 340.3694 | 40.22545 | 5.24 |
| 4674 | 340.4002 | 41.54912 | 5.94 |
| 4675 | 340.4392 | 29.30764 | 4.8  |
| 4676 | 340.4894 | 14.51639 | 5.92 |
| 4677 | 340.6537 | -47.2108 | 6    |
| 4678 | 340.6669 | -46.8846 | 2.12 |
| 4679 | 340.7506 | 30.22125 | 2.94 |
| 4680 | 340.8749 | -41.4143 | 4.84 |
| 4681 | 340.8968 | -18.8304 | 4.68 |
| 4682 | 341.0217 | 39.46535 | 5.98 |
| 4683 | 341.0228 | 41.81923 | 5.11 |
| 4684 | 341.4078 | -53.5001 | 4.85 |
| 4685 | 341.4199 | -46.5473 | 5.5  |
| 4686 | 341.5146 | -81.3816 | 4.14 |
| 4687 | 341.5426 | 44.54605 | 5.84 |
| 4688 | 341.6328 | 23.56565 | 3.96 |
| 4689 | 341.6733 | 12.17289 | 4.21 |
| 4690 | 341.8711 | 83.15383 | 4.78 |
| 4691 | 341.888  | -19.6134 | 5.25 |
| 4692 | 341.9282 | -14.0564 | 5.68 |
| 4693 | 342.046  | 37.41669 | 5.81 |
| 4694 | 342.1387 | -51.3169 | 3.49 |
| 4695 | 342.3979 | -13.5926 | 4.04 |
| 4696 | 342.4201 | 66.20041 | 3.5  |
| 4697 | 342.443  | 55.90278 | 5.44 |
| 4698 | 342.5008 | 24.60158 | 3.51 |
| 4699 | 342.5907 | 41.95339 | 5.93 |
| 4700 | 342.5951 | -80.1238 | 5.32 |
| 4701 | 342.759  | -39.1568 | 5.4  |
| 4702 | 342.7626 | 85.37374 | 5.9  |
| 4703 | 342.8372 | -29.5363 | 5.99 |
| 4704 | 342.8443 | 61.69674 | 5.83 |
| 4705 | 343.0085 | 43.31242 | 4.94 |
| 4706 | 343.1003 | 9.835664 | 5.16 |
| 4707 | 343.1314 | -32.8755 | 4.51 |
| 4708 | 343.1536 | -7.5796  | 3.75 |
| 4709 | 343.2594 | 16.84119 | 5.89 |
| 4710 | 343.3696 | -11.6165 | 5.79 |
| 4711 | 343.4173 | 44.74916 | 5.81 |
| 4712 | 343.5291 | 40.37691 | 5.82 |
| 4713 | 343.604  | 84.34618 | 4.69 |
| 4714 | 343.6626 | -15.8208 | 3.27 |
| 4715 | 343.6895 | -16.272  | 5.54 |
| 4716 | 343.761  | 37.07683 | 5.91 |
| 4717 | 343.7957 | -4.9879  | 5.75 |
| 4718 | 343.807  | 8.816166 | 4.91 |
| 4719 | 343.9354 | 36.35139 | 5.74 |
| 4720 | 343.9871 | -32.5396 | 4.22 |

|      |          |          |      |
|------|----------|----------|------|
| 4721 | 344.0985 | 41.60388 | 5.6  |
| 4722 | 344.1083 | 49.73354 | 4.98 |
| 4723 | 344.1992 | -47.9692 | 5.71 |
| 4724 | 344.2688 | 48.68407 | 5.34 |
| 4725 | 344.3666 | 20.76883 | 5.45 |
| 4726 | 344.4127 | -29.6222 | 1.23 |
| 4727 | 344.7992 | 11.72884 | 5.77 |
| 4728 | 344.8644 | 0.962927 | 5.43 |
| 4729 | 344.899  | -29.4623 | 5.51 |
| 4730 | 345.0213 | 56.94537 | 5.1  |
| 4731 | 345.0241 | -25.1642 | 5.66 |
| 4732 | 345.1788 | 3.011805 | 5.84 |
| 4733 | 345.22   | -52.7541 | 4.12 |
| 4734 | 345.2816 | -50.95   | 5.68 |
| 4735 | 345.3308 | -28.854  | 5.55 |
| 4736 | 345.3821 | -4.71146 | 5.94 |
| 4737 | 345.4803 | 42.32597 | 3.64 |
| 4738 | 345.6516 | 42.75779 | 5.09 |
| 4739 | 345.6844 | -20.8707 | 5.98 |
| 4740 | 345.8742 | -34.7494 | 5.13 |
| 4741 | 345.887  | 67.20921 | 5.23 |
| 4742 | 345.9436 | 28.08279 | 2.47 |
| 4743 | 345.9692 | 3.820045 | 4.5  |
| 4744 | 345.9985 | -41.4789 | 5.79 |
| 4745 | 346.0458 | 50.05209 | 4.65 |
| 4746 | 346.1651 | -53.9649 | 5.37 |
| 4747 | 346.1902 | 15.20526 | 2.49 |
| 4748 | 346.2176 | -68.8202 | 5.52 |
| 4749 | 346.2908 | -7.69377 | 5.44 |
| 4750 | 346.6534 | 59.41976 | 4.85 |
| 4751 | 346.6702 | -23.7431 | 4.48 |
| 4752 | 346.7197 | -43.5204 | 4.33 |
| 4753 | 346.7234 | -38.8923 | 5.63 |
| 4754 | 346.7511 | 9.409492 | 4.54 |
| 4755 | 346.7781 | 25.46826 | 4.76 |
| 4756 | 346.8696 | 21.13425 | 5.96 |
| 4757 | 346.9136 | 46.38723 | 5.3  |
| 4758 | 346.9391 | 49.29578 | 5.69 |
| 4759 | 346.9744 | 75.3875  | 4.42 |
| 4760 | 347.0878 | -28.8237 | 5.61 |
| 4761 | 347.1705 | 2.127883 | 5.43 |
| 4762 | 347.3617 | -21.1724 | 3.68 |
| 4763 | 347.3811 | 8.677161 | 5.03 |
| 4764 | 347.4339 | 59.33269 | 5.69 |
| 4765 | 347.436  | -28.0886 | 5.87 |
| 4766 | 347.4788 | -22.4576 | 4.72 |
| 4767 | 347.489  | -42.8613 | 5.83 |
| 4768 | 347.5061 | 9.822082 | 5.39 |
| 4769 | 347.5406 | -40.5915 | 5.95 |
| 4770 | 347.5897 | -45.2467 | 3.88 |
| 4771 | 347.6133 | 43.54423 | 5.91 |
| 4772 | 347.6777 | 17.59437 | 5.68 |
| 4773 | 347.9341 | 8.720116 | 5.16 |
| 4774 | 348.1375 | 49.40621 | 4.54 |
| 4775 | 348.3207 | 57.16836 | 5.57 |
| 4776 | 348.3604 | 11.065   | 5.86 |
| 4777 | 348.5807 | -6.049   | 4.23 |
| 4778 | 348.6546 | 74.23127 | 5.89 |
| 4779 | 348.7443 | -41.1054 | 5.77 |

|      |          |          |       |
|------|----------|----------|-------|
| 4780 | 348.8927 | -3.49638 | 5.56  |
| 4781 | 348.9072 | 70.88808 | 5.55  |
| 4782 | 348.9729 | -9.08774 | 4.24  |
| 4783 | 349.1658 | -44.4892 | 5.92  |
| 4784 | 349.1763 | 53.21348 | 5.58  |
| 4785 | 349.2122 | -7.7265  | 4.997 |
| 4786 | 349.2404 | -62.0012 | 5.66  |
| 4787 | 349.2914 | 3.282289 | 3.7   |
| 4788 | 349.3574 | -58.2357 | 4     |
| 4789 | 349.436  | 49.0153  | 4.83  |
| 4790 | 349.4759 | -9.18251 | 4.41  |
| 4791 | 349.5412 | -40.8244 | 5.54  |
| 4792 | 349.5972 | 41.77368 | 5.99  |
| 4793 | 349.6562 | 68.11144 | 4.86  |
| 4794 | 349.706  | -32.532  | 4.41  |
| 4795 | 349.7403 | -9.61075 | 5.01  |
| 4796 | 349.7778 | -13.4586 | 5.2   |
| 4797 | 349.8499 | -5.12435 | 5.58  |
| 4798 | 349.8505 | -18.0754 | 5.96  |
| 4799 | 349.8742 | 48.62532 | 5.45  |
| 4800 | 349.9684 | 42.07804 | 5.79  |
| 4801 | 350.0858 | 5.381307 | 5.07  |
| 4802 | 350.1593 | 23.74034 | 4.59  |
| 4803 | 350.2065 | 30.41492 | 5.58  |
| 4804 | 350.2219 | 38.18233 | 5.78  |
| 4805 | 350.3146 | -26.9868 | 5.66  |
| 4806 | 350.4789 | 31.81246 | 5.35  |
| 4807 | 350.6356 | 60.13349 | 5.53  |
| 4808 | 350.6632 | -15.0393 | 5.21  |
| 4809 | 350.7426 | -20.1006 | 3.96  |
| 4810 | 350.769  | 12.31391 | 5.08  |
| 4811 | 351.0553 | -51.8912 | 5.74  |
| 4812 | 351.2094 | 62.28281 | 4.97  |
| 4813 | 351.2118 | 32.38488 | 5.56  |
| 4814 | 351.3311 | -56.849  | 5.6   |
| 4815 | 351.3449 | 23.4041  | 4.43  |
| 4816 | 351.5116 | -20.642  | 4.37  |
| 4817 | 351.6524 | -52.7216 | 5.53  |
| 4818 | 351.7331 | 1.255608 | 4.93  |
| 4819 | 351.7536 | 87.3075  | 5.56  |
| 4820 | 351.7808 | 42.91201 | 5.75  |
| 4821 | 351.8125 | -58.4761 | 5.64  |
| 4822 | 351.8193 | 70.35978 | 5.6   |
| 4823 | 351.9183 | 25.16728 | 5.99  |
| 4824 | 351.9921 | 6.378992 | 4.28  |
| 4825 | 352.0158 | -87.4822 | 5.5   |
| 4826 | 352.2541 | -63.1107 | 5.66  |
| 4827 | 352.2887 | 12.76055 | 4.54  |
| 4828 | 352.5081 | 58.54892 | 4.89  |
| 4829 | 352.8226 | 39.2362  | 5.23  |
| 4830 | 353.2427 | -37.8183 | 4.38  |
| 4831 | 353.3193 | -20.9145 | 4.71  |
| 4832 | 353.3316 | -77.3853 | 5.82  |
| 4833 | 353.3671 | 22.49877 | 5.41  |
| 4834 | 353.4883 | 31.32528 | 4.98  |
| 4835 | 353.5376 | -1.24757 | 5.89  |
| 4836 | 353.6564 | 40.23644 | 5.56  |
| 4837 | 353.6592 | 33.49733 | 5.63  |
| 4838 | 353.7057 | -15.246  | 5.95  |

|      |          |          |      |
|------|----------|----------|------|
| 4839 | 353.746  | 71.64204 | 5.85 |
| 4840 | 353.769  | -42.6151 | 4.71 |
| 4841 | 354.097  | 2.102222 | 5.7  |
| 4842 | 354.3835 | 44.42899 | 5.82 |
| 4843 | 354.391  | 46.45815 | 3.87 |
| 4844 | 354.4148 | -13.0602 | 5.66 |
| 4845 | 354.4625 | -45.4924 | 4.74 |
| 4846 | 354.4867 | 18.40067 | 5.49 |
| 4847 | 354.5342 | 43.26807 | 4.29 |
| 4848 | 354.5995 | -76.8696 | 5.99 |
| 4849 | 354.7847 | 50.47173 | 5.35 |
| 4850 | 354.7924 | 75.29288 | 5.96 |
| 4851 | 354.8369 | 77.63228 | 3.22 |
| 4852 | 354.8381 | 74.00263 | 5.98 |
| 4853 | 354.9461 | -14.2222 | 4.98 |
| 4854 | 354.9793 | 9.677294 | 5.99 |
| 4855 | 354.9877 | 5.626292 | 4.14 |
| 4856 | 355.1021 | 44.33393 | 4.15 |
| 4857 | 355.159  | -32.0731 | 5.31 |
| 4858 | 355.2871 | -11.6807 | 5.89 |
| 4859 | 355.3937 | -18.0271 | 5.35 |
| 4860 | 355.4409 | -17.8165 | 4.82 |
| 4861 | 355.4862 | 7.250546 | 5.9  |
| 4862 | 355.5117 | 1.780041 | 4.5  |
| 4863 | 355.6159 | -15.448  | 5.26 |
| 4864 | 355.6806 | -14.5449 | 4.49 |
| 4865 | 355.8432 | 10.33154 | 5.1  |
| 4866 | 355.9979 | 29.36145 | 4.94 |
| 4867 | 356.0502 | -64.4045 | 5.72 |
| 4868 | 356.0503 | -18.2769 | 5.24 |
| 4869 | 356.1702 | -78.7914 | 5.74 |
| 4870 | 356.5038 | -18.6783 | 5.63 |
| 4871 | 356.5085 | 46.42027 | 4.98 |
| 4872 | 356.598  | 3.486811 | 5.02 |
| 4873 | 356.6531 | 66.78224 | 5.95 |
| 4874 | 356.758  | 57.45136 | 5.53 |
| 4875 | 356.7644 | 58.65199 | 4.88 |
| 4876 | 356.8163 | -11.9111 | 5.73 |
| 4877 | 356.8166 | -50.2265 | 5.17 |
| 4878 | 356.9782 | 67.80681 | 5.05 |
| 4879 | 356.9856 | -2.7616  | 5.5  |
| 4880 | 357.2314 | -28.1303 | 4.58 |
| 4881 | 357.3645 | 1.076131 | 5.77 |
| 4882 | 357.4141 | 28.84239 | 5.96 |
| 4883 | 357.4207 | 36.42528 | 5.87 |
| 4884 | 357.5614 | -9.97414 | 5.93 |
| 4885 | 357.6387 | -14.4015 | 5.7  |
| 4886 | 357.8385 | 9.313351 | 5.8  |
| 4887 | 357.8389 | -18.9092 | 5.19 |
| 4888 | 357.991  | 2.930384 | 5.58 |
| 4889 | 358.027  | -82.0188 | 5.11 |
| 4890 | 358.122  | 19.12029 | 5.08 |
| 4891 | 358.125  | -14.2512 | 5.84 |
| 4892 | 358.1546 | 10.94732 | 5.31 |
| 4893 | 358.2105 | -8.99676 | 5.75 |
| 4894 | 358.2315 | -3.15548 | 5.93 |
| 4895 | 358.596  | 57.49938 | 4.51 |
| 4896 | 358.6943 | 0.109309 | 5.86 |
| 4897 | 358.8895 | 47.3558  | 6    |

|      |          |          |      |
|------|----------|----------|------|
| 4898 | 359.2853 | 55.70571 | 5.57 |
| 4899 | 359.3329 | -62.9566 | 5.96 |
| 4900 | 359.387  | -82.1698 | 5.73 |
| 4901 | 359.3962 | -64.2982 | 5    |
| 4902 | 359.4397 | 25.1414  | 4.66 |
| 4903 | 359.6682 | -3.55598 | 4.88 |
| 4904 | 359.7324 | -52.7458 | 5.13 |
| 4905 | 359.7522 | 55.75493 | 4.88 |
| 4906 | 359.8279 | 6.863321 | 4.03 |
| 4907 | 359.8662 | -29.4852 | 5.59 |
| 4908 | 359.9791 | -65.5771 | 4.5  |
