# Supplementary material for: A Star Pattern Recognition Algorithm Based on the Radial Companion-Circumferential Feature
Source: Hindawi journal article supplement (doi:10.1155/2022/1857481), 2022-09-13
Supplement: f1 [file 1857481.f1.zip › 1857481.f1/Annex 3- 8 star maps data.pdf]

|     |        |        |  |     |        |        |
|-----|--------|--------|--|-----|--------|--------|
| A01 | 22.64  | 489.48 |  | B01 | 24.23  | 38.41  |
| A02 | 38.14  | 117.35 |  | B02 | 201.29 | 14.37  |
| A03 | 75.33  | 189.14 |  | B03 | 24.39  | 154.16 |
| A04 | 108.24 | 409.06 |  | B04 | 364.31 | 50.23  |
| A05 | 141.67 | 352.92 |  | B05 | 198.44 | 145.88 |
| A06 | 226.09 | 66.51  |  | B06 | 265.22 | 119.01 |
| A07 | 240.17 | 29.74  |  | B07 | 268.41 | 222.59 |
| A08 | 236.45 | 158.81 |  | B08 | 217.73 | 279.38 |
| A09 | 256.51 | 149.01 |  | B09 | 292.36 | 249.03 |
| A10 | 264.27 | 437.95 |  | B10 | 229.82 | 287.51 |
| A11 | 283.75 | 431.53 |  | B11 | 123.64 | 420.49 |
| A12 | 352.29 | 287.05 |  | B12 | 382.53 | 282.53 |
| A13 | 393.39 | 495.09 |  | B13 | 260.42 | 384.87 |
| A14 | 425.09 | 438.75 |  | B14 | 125.27 | 485.79 |
| A15 | 461.93 | 200.34 |  | B15 | 453.94 | 338.11 |
|     |        |        |  | B16 | 436.79 | 506.43 |
|     |        |        |  |     |        |        |
|     |        |        |  |     |        |        |
| C01 | 2.6    | 364.78 |  | D01 | 11.22  | 68.58  |
| C02 | 183.05 | 513.7  |  | D02 | 42.37  | 277.23 |
| C03 | 221.58 | 277.97 |  | D03 | 131.74 | 324.91 |
| C04 | 259.24 | 501.8  |  | D04 | 202.12 | 115.63 |
| C05 | 323.88 | 497.1  |  | D05 | 241.29 | 480.2  |
| C06 | 339.12 | 413.82 |  | D06 | 327.02 | 219.08 |
| C07 | 415.16 | 74.13  |  | D07 | 334.61 | 130.37 |
|     |        |        |  | D08 | 357.63 | 344.18 |
|     |        |        |  | D09 | 370.56 | 88.89  |
|     |        |        |  | D10 | 400.67 | 80.41  |
|     |        |        |  | D11 | 439.67 | 224.07 |
|     |        |        |  | D12 | 442.85 | 198.43 |
|     |        |        |  |     |        |        |
| E01 | 4.91   | 425.5  |  | F01 | 18.12  | 376.81 |
| E02 | 30.33  | 279.45 |  | F02 | 45.17  | 9.17   |
| E03 | 78.11  | 33.91  |  | F03 | 78.56  | 78.44  |
| E04 | 149.33 | 61.23  |  | F04 | 105.59 | 299.34 |
| E05 | 193.56 | 36.64  |  | F05 | 145.5  | 264.35 |
| E06 | 196.47 | 401.69 |  | F06 | 213.02 | 407.92 |
| E07 | 330.96 | 36.78  |  | F07 | 240.85 | 52.77  |
| E08 | 404.25 | 360.57 |  | F08 | 231.25 | 63.51  |
| E09 | 490.23 | 345.61 |  | F09 | 280.04 | 326.91 |
|     |        |        |  | F10 | 352.93 | 184.78 |
|     |        |        |  | F11 | 420.78 | 338.27 |
|     |        |        |  | F12 | 465.44 | 101.18 |
|     |        |        |  |     |        |        |

|     |         |         |  |     |         |        |
|-----|---------|---------|--|-----|---------|--------|
|     |         |         |  |     |         |        |
| G01 | 22.77   | 328.8   |  | H01 | 6.79    | 739.29 |
| G02 | 29.24   | 431.41  |  | H02 | 11.27   | 277.98 |
| G03 | 59.25   | 103.16  |  | H03 | 58.92   | 978.6  |
| G04 | 56.82   | 867.24  |  | H04 | 110.18  | 877.78 |
| G05 | 70.31   | 978.7   |  | H05 | 150.56  | 757.88 |
| G06 | 68.94   | 670.41  |  | H06 | 158.92  | 803.94 |
| G07 | 123.7   | 776.23  |  | H07 | 166.32  | 186.48 |
| G08 | 126.43  | 294.83  |  | H08 | 176.86  | 980.53 |
| G09 | 124.69  | 574.967 |  | H09 | 169.07  | 797.91 |
| G10 | 162.95  | 445.94  |  | H10 | 219.26  | 953.14 |
| G11 | 183.36  | 887.32  |  | H11 | 209.71  | 297.23 |
| G12 | 171.05  | 459.26  |  | H12 | 271.09  | 590.43 |
| G13 | 178.32  | 349.02  |  | H13 | 318.91  | 852.4  |
| G14 | 176.86  | 505.38  |  | H14 | 356.73  | 783.47 |
| G15 | 185.1   | 680.03  |  | H15 | 455.98  | 975.2  |
| G16 | 187.25  | 500.09  |  | H16 | 460.96  | 394.12 |
| G17 | 228.42  | 656.02  |  | H17 | 485.4   | 534.91 |
| G18 | 258.28  | 212.97  |  | H18 | 507.01  | 880.3  |
| G19 | 288.04  | 987.54  |  | H19 | 530.06  | 871.72 |
| G20 | 300.47  | 300.32  |  | H20 | 605.58  | 695.42 |
| G21 | 332.69  | 563.67  |  | H21 | 664.21  | 943.43 |
| G22 | 374.3   | 498.11  |  | H22 | 697.04  | 238.49 |
| G23 | 437.01  | 74.76   |  | H23 | 732.18  | 587.26 |
| G24 | 460.77  | 693.11  |  | H24 | 769.78  | 265.92 |
| G25 | 484.8   | 158.6   |  | H25 | 806.02  | 706.71 |
| G26 | 502.94  | 114.87  |  | H26 | 859.72  | 386.03 |
| G27 | 493.94  | 269.72  |  | H27 | 902.25  | 279.16 |
| G28 | 518.26  | 258.68  |  | H28 | 954.18  | 351.66 |
| G29 | 517.27  | 603.46  |  | H29 | 1005.41 | 320.21 |
| G30 | 540.66  | 596.53  |  |     |         |        |
| G31 | 627.55  | 427.1   |  |     |         |        |
| G32 | 668.6   | 675.71  |  |     |         |        |
| G33 | 708.44  | 610.08  |  |     |         |        |
| G34 | 761.68  | 327.43  |  |     |         |        |
| G35 | 823.56  | 4.54    |  |     |         |        |
| G36 | 826.51  | 451.5   |  |     |         |        |
| G37 | 838.97  | 392.79  |  |     |         |        |
| G38 | 905.08  | 132.88  |  |     |         |        |
| G39 | 956.54  | 26.81   |  |     |         |        |
| G40 | 994.97  | 1005.55 |  |     |         |        |
| G41 | 1003.12 | 104.16  |  |     |         |        |
